# Supplementary material for: Genome-Wide Association Study of Leaf Rust Resistance at Seedling and Adult Plant Stages in a Global Barley Panel
Source: MDPI journal article supplement (doi:10.3390/agriculture12111829), 2022-11-01
Supplement: s1 [file s1]

Archive with 7 entries (7 files):
- agriculture-1930506-supplementary/Supplementary Figures.pdf
- agriculture-1930506-supplementary/Supplementary Table S1.xlsx
- agriculture-1930506-supplementary/Supplementary Table S3.xlsx
- agriculture-1930506-supplementary/Supplementary Table S5.xlsx
- agriculture-1930506-supplementary/Supplementary Table S6.xlsx
- agriculture-1930506-supplementary/Supplimentary Table S2.xlsx
- agriculture-1930506-supplementary/Supplimentary Table S4.xlsx
