# Supplementary material for: Genome-Wide Association Study of Leaf Rust Resistance at Seedling and Adult Plant Stages in a Global Barley Panel
Source: MDPI journal article supplement (doi:10.3390/agriculture12111829), 2022-11-01
Supplement: s1 [file s1 › agriculture-1930506-supplementary/Supplementary Table S1.xlsx]

## Sheet: Sheet1
Entry #	Pedigree	Row type	Seedling resistance		Adult plant resistance
			SRT-MCH	SRT-SAT	APR-SAT17	APR-SAT19
AM1	CI7584	6	2	3.5	294	50
AM2	H.spont.41-1/WI3257	2	1	3	168	50
AM3	Coss/OWB71080-44-1H//Viringa'S'/3/WI3180	2	2.5	2.5	7	24
AM4	Momtaz	6	1.5	1	196	60
AM5	ICARDA SN326	6	2.5	1.5	56	24
AM6	M122 (Quest)	6	2.5	1	196	24
AM7	WI2291	2	2	2.5	-	50
AM8	ESMERALDA/LEGACY/6/P.STO/3/LBIRAN/UNA80//LIGNEE640/4/BLLU/5/PETUNIA 1	6	3.5	2.5	266	50
AM9	QUINA/MJA//SCARLETT	6	2	2.5	231	16
AM10	CI19819	2	3	1	238	24
AM11	Pol2	6	2.5	0	196	24
AM12	TR03189	2	1	3	329	50
AM13	CIRUELO	6	3	2	322	50
AM14	Manal	6	3	0	140	24
AM15	PETUNIA 1	6	2	2.5	350	40
AM16	P.STO/3/LBIRAN/UNA80//LIGNEE640/4/BLLU/5/PETUNIA 1	2	3	3.5	4.2	50
AM17	WI3167/6/ANCA/2469//TOJI/3/SHYRI/4/ATACO/5/ALELI/7/Arar/Lignee527//Zy/DL69	2	2	3	252	24
AM18	Alanda/5/Aths/4/Pro/TolI//Cer12/TolI/3/5106/6/Aths/7/Giza129	6	2	2	42	50
AM19	PENCO/CHEVRON-BAR	6	3	1	70	-
AM20	Alanda 01	6	2.5	1.5	21	16
AM21	TR250	2	3	4	-	50
AM22	Harmal	2	3	3.5	35	60
AM23	CI3576	2	3	3.5	252	40
AM24	LAKHAN (K226)	6	3.5	3.5	224	40
AM25	WI3180/4/ALISO/CI3909.2//HB602/3/MOLA/SHYRI//ARUPO*2/JET	6	2.5	1	42	24
AM26	Barjouj	6	2	0	98	24
AM27	Nawair-01	2	2.5	3	56	50
AM28	Haruna Nijo	6	3	1	294	50
AM29	CI5791	6	2.5	1	196	16
AM30	H96117004	6	1.5	2	112	50
AM31	ATACO/BERMEJO//HIGO/3/CALI92/ROBUST/4/PETUNIA 1/5/PETUNIA 1/CHINIA/3/ATACO/BERMEJO//HIGO/6/ZIGZIG/3/M9846//CCXX14.ARZ3/PACO CBSS01M00763D-0TOPY-7M-2M-1Y-1M-0Y	6	2	2.5	385	50
AM32	Rihane-03	6	2	1	280	-
AM33	CPOLO 9109/PETUNIA 2 M00053001 08/1G0035	6	2	2.5	112	50
AM34	VMorales/6/ZIGZIG/4/EGYPT4/TERAN78//P.STO/3/QUINA CBSS04B00042S-0M-0Y-0M-0Y-1M-0AP	6	3	2.5	14	-
AM35	PETUNIA 1/RITA PELADA	6	2.5	2.5	14	60
AM36	BBSC/CONGONA//FRESA CBSS05Y00126S-20Y-0M-0Y-0M-2AP	6	3	1	231	50
AM37	TR05671	2	2.5	2.5	14	16
AM38	MSEL/LOGAN-BAR CBSS03B00016S-0M-0Y-0M-0Y-1M-0Y	2	3	2	196	16
AM39	M104/PFC 88210//DOÑA JOSEFA	6	3	2.5	24.5	40
AM40	Chigwell	6	2	1	9.8	24
AM41	Busby	2	1.5	2.5	112	40
AM42	Bentley	2	2	3	350	40
AM43	Xena	2	2	4	217	40
AM44	Celebration	6	2.5	3.5	168	50
AM45	SVANHALS-BAR/MSEL//AZAF/GOB24DH/3/NE167/CLE176 CBSS05Y00056S-10Y-0M-0Y-0M-3AP	2	2.5	2.5	56	16
AM46	San Cristobal	2	2	2.5	7	24
AM47	CIRU/ZIGZIG	6	2.5	1.5	-	50
AM48	Horonera	2	3	2.5	63	50
AM49	Canela	2	3	1.5	30.8	40
AM50	Scarlett	2	2	1	14	40
AM51	HB511/JAEGER H00056005 09/3H0078	6	2.5	2.5	-	24
AM52	LACEY	6	2.5	1.5	322	60
AM53	P.STO/3/LBIRAN/UNA80//LIGNEE640/4/BLLU/5/PETUNIA 1/6/CHAMICO/TOCTE//CONGONA	6	2.5	1.5	392	24
AM54	Legacy	6	1	2	357	40
AM55	P.STO/3/LBIRAN/UNA80//LIGNEE640/4/BLLU/5/PETUNIA 1/6/P.STO/3/LBIRAN/UNA80//LIGNEE640/4/BLLU/5/PETUNIA 1	6	2.5	2	266	24
AM56	PENCO/CHEVRON-BAR/3/LEGACY//PENCO/CHEVRON-BAR CBSS04Y00048S-23Y-2M-0Y-0M-0Y-0AP	6	2.5	1.5	294	40
AM57	ICARO	2	2.5	2.5	490	40
AM58	CANELA/DEFRA	2	2	2.5	322	50
AM59	MSEL/FNC1	2	2	1.5	385	16
AM60	LOGAN-BAR/MSEL//AZAF	2	1.5	1.25	490	24
AM61	MERIT,B/4/AZAF/3/ARUPO/K8755//MORA/5/MSEL	2	2	2	322	8
AM62	ALELI/SCARLETT CBSS05M00148S-2M-0Y-0M-0AP-0TR	2	1	1.5	56	24
AM63	ACUARIO T95/BCD12DH	2	2	1.75	147	32
AM64	MSEL//DEFRA/CL128	2	2.5	1.5	245	16
AM65	SUMBARD400	6	2	2.5	322	50
AM66	R.T.RAMAGE	6	2.5	0	168	16
AM67	DWR28	2	2.5	2	56	50
AM68	DWRUB52	2	1	2	266	60
AM69	FIRAT	2	1	2	259	50
AM70	ATILIR	2	1	2.75	182	8
AM71	CABUYA/MJA//PETUNIA 1/5/PENCO/CHEVRON-BAR/3/ATACO/ BERMEJO//HIGO/4/PETUNIA 1	6	1	2.5	168	50
AM72	Moronera	2	1	2	16.8	24
AM73	Grignon	2	1	1.5	280	50
AM74	Pasadena	2	1.5	2	126	24
AM75	Mauritia	2	1	2	322	16
AM76	Philadelphia	2	1	1	294	8
AM77	Bodega	2	2	2.5	490	40
AM78	Tocada	2	2	2.5	56	30
AM79	Conchita	2	1	1	224	-
AM80	Aricada	2	2.5	3.5	322	70
AM81	Victoriana	2	2.5	1	154	30
AM82	Flagon	2	2	1	42	24
AM83	Suzuka	2	2.5	2.5	322	-
AM84	Braemar	2	2	2	-	60
AM85	Cristalia	2	2.5	2.5	560	24
AM86	Cocktail	6	2	3	56	16
AM87	NFC Tipple	2	1.5	1.5	294	16
AM88	Orria	2	1.5	1	350	40
AM89	Barabas	2	1.5	2	490	24
AM90	Christina	2	2.5	2	350	8
AM91	Frontier	2	1	1	294	32
AM92	Nymfe	2	3	2	168	16
AM93	Poet	2	1	1	315	32
AM94	Power	6	1.5	2.5	385	50
AM95	Sebastian	2	2	2	490	40
AM96	SJ055066	2	2	1	385	18
AM97	SJ056089	2	1	1	490	8
AM98	SJ056576	2	1	1	126	32
AM99	MSEL/LOGAN-BAR	2	1	2	350	32
AM100	AZAF/SCARLETT	2	1	3	70	16
AM101	ESMERALDA/3/SLLO/ROBUST//QUINA/4/M104	6	1.5	2	385	50
AM102	BRS195/SCARLETT	2	1.5	2	490	50
AM103	PFC9202//LM 844/QUILMES PAMPA/3/CANELA	2	2	2.5	490	70
AM104	PFC9214//PENCO/CHEVRON-BAR	2	2.5	3	140	50
AM105	LIMON/BICHY2000/4/ALELI/3/ARUPO/K8755//MORA/5/MSEL	2	3.5	2.5	196	50
AM106	80.5162/MSEL//GLORIA-BAR/IAR.H.485	2	4	3.5	455	16
AM107	ATACO/BERMEJO//HIGO/3/CALI92/ROBUST/4/PETUNIA1/5/PETUNIA/CHINIA/3/ATACO/BERMEJO//HIGO/6/ZIGZIG/3/M9846//CCXX14.ARZ3/PACO	6	3	2	2.8	32
AM108	P.STO/3/LBIRAN/UNA80//LIGNEE640/4/BLLU/5/PETUNIA 1/6/M9846//CCXX14.ARZ3/PACO/3/PALTON	6	2.5	2.5	350	32
AM109	BRS195/ND19098-1	2	1.5	3.5	28	16
AM110	P.STO/3/LBIRAN/UNA80//LIGNEE640/4/BLLU/5/PETUNIA 1/6/ZIGZIG/4/EGYPT4/TERAN78//P.STO/3/QUINA	6	1.5	2.5	322	50
AM111	BICHY2000//GOB/HUMAI10	2	1.5	2.5	294	24
AM112	P.STO/3/LBIRAN/UNA80//LIGNEE640/4/BLLU/5/PETUNIA 1/6/M111/7/LEGACY/3/SVANHALSBAR/MSEL//AZAF/GOB24DH	6	2	2	56	40
AM113	MSEL/LA MOLINA 95	2	1.5	3	252	50
AM114	SARA1-BAR/CAPUCHONA 20	6	2	3	294	40
AM115	MSEL/ND19098-1//CANELA	2	1.5	3	490	40
AM116	PETUNIA 2/M111	6	2	3.5	525	50
AM117	C-84	6	3	2	350	-
AM118	Arta	6	2	1.5	455	50
AM119	PL 172	6	3	2	322	16
AM120	PL426	6	2.5	2	350	40
AM121	RD2552	6	2.5	1.5	287	40
AM122	RD2660	6	2.5	2	168	40
AM123	CLASS	2	2	1	294	60
AM124	SIMBA	2	1.5	2	322	24
AM125	KEOPS	2	2	3	560	50
AM126	QUENCH	2	2	2.5	525	60
AM127	HENLEY	2	2	2	385	50
AM128	FAIRYTALE	2	2	2	70	60
AM129	UMBRELLA	2	1	1	322	60
AM130	ANAKIN	2	2	2	252	-
AM131	CHARMAY	2	2	1	322	50
AM132	IRON	2	2.5	1	490	-
AM133	JB FLAVOUR	2	3	0	168	50
AM134	KONTIKI	2	3.5	3.5	252	60
AM135	STINE	2	3.5	2.5	193.2	50
AM136	CALCULE	2	2.5	2	490	50
AM137	MAGALY	2	2.5	1	385	40
AM138	JB MALTASIA	2	1	2	385	60
AM139	MARTHE	2	2	2	70	40
AM140	ESSENTIAL	2	1.5	1	224	-
AM141	CHAKIRA 3 UNIDADES / PEDIDO: 1 UNIDAD MAS	2	2	1	322	-
AM142	6B10-4515	6	2	2	357	-
AM143	TRADITION	6	2	2	224	50
AM144	INNOVATION	6	2	2	490	40
AM145	STELLAR ND	6	2.5	2	168	24
AM146	2B10-4274	2	2.5	2.5	-	50
AM147	2B10-4543	2	3	2.5	385	60
AM148	ABI VOYAGER	2	3.5	1	231	40
AM149	MERIT 57	2	3	1.5	140	60
AM150	CONRAD	2	3	2	140	50
AM151	MADRE SELVA/Keel	6	2	1	455	40
AM152	MADRE SELVA/Barque	6	1.5	1	322	40
AM153	Petunia1//Atahualpa/IraqiBlack	2	1.5	1	56	40
AM154	Alanda-01/Petunia1	2	1	2.5	490	40
AM155	MADRE SELVA/Malt 1	6	1.5	2.5	2.8
AM156	SEN	2	1.5	2	385	50
AM157	Harrington/Arta//Malt 1	6	1	2	490	50
AM159	MADRE SELVA/Malt 2	6	4	2	168	50
AM161	PENCO/CHEVRON-BAR//BREA/DL70	6	3	1.5	14	50
AM162	PENCO/CHEVRON-BAR//ND20493	6	3.5	1.5	322	60
AM163	PENCO/CHEVRON-BAR//GRIT	6	2	1.5	385	70
AM164	BREA/DL70//3*TOCTE/3/6B89.2027/CHAMICO	6	2	2	14	16
AM165	BREA/DL70//TOCTE/3/BREA/DL70//CABUYA/4/BREA/DL70//CABUYA	6	2	2.5	322	60
AM166	LEGACY/CHAMICO//TRADITION	6	2.5	3	140	60
AM167	LEGACY/4/TOCTE//GOB/HUMAI10/3/ATAH92/ALELI/5/LEGACY/CHAMICO	6	1.5	1.5	350	50
AM168	LEGACY/4/TOCTE//GOB/HUMAI10/3/ATAH92/ALELI/5/CIRUELO	2	2	3	420	50
AM169	LEGACY/CHAMICO//ATAH92/GOB	6	2	1.5	252	40
AM170	GADA/PYE//VADA	2	2	2.5	28	40
AM171	ZIG ZIG/PUNGSANCHAPSSALBORI	6	2	4	98	60
AM172	BREA/DL70/M97.106	6	2	4	385	50
AM173	BGCLM 157.MBV/ND20493	6	2	3	490	60
AM174	ORCA-BAR/WC46310	6	3	2	350	24
AM175	BISON 217/3/SVANHALS-BAR/MSEL//AZAF/GOB24DH	2	4	1	420	60
AM176	ORCA-BAR/GUAYABA	2	4	2.5	210	60
AM177	SHYRI/3/ZHEDAR#1/SHYRI//OLMO	2	3	1.5	224	50
AM178	SHYRI/3/SVANHALS-BAR/MSEL//AZAF/GOB24DH	2	3	1.5	42	50
AM179	OPS 19/CANELA	6	2	2	196	50
AM180	TANGO-BAR/MALEBO	2	2	3	287	60
AM181	BISON 129/CANELA	2	2	3	224	16
AM182	OPS 66/CANELA	2	2.5	3	84	50
AM183	SICH84.80/BISON 129	2	2.5	2.5	294	60
AM184	SICH84.80/BISON 216.4	2	2.5	2.5	196	40
AM185	ORW11/OPS 78	2	3	2.5	350	60
AM186	STRIDER/3/GRIT/VALERIANA//GLORIA-BAR/COPAL	2	2.5	2.5	112	50
AM187	STAB33/PASION	2	3	1.5	630	60
AM188	RD 2794	6	1.5	2	385	-
AM189	PL 419	6	3.5	2.5	266	-
AM190	BH 75	6	4	2	385	-
AM191	HBL 316	6	3	2	224	-
AM192	K 409	6	3	2.5	322	50
AM193	PL 172	6	3.5	2	196	40
AM194	V Morales	6	2	1.25	224	32
AM195	BHS 380	6	2	3	28	50
AM196	BH 393	6	2	2	322	50
AM197	RANTIT	6	2.5	2	189	40
AM198	VLB 1	6	2.5	2	294	40
AM199	RD 2786	6	2.5	2	35	40
AM200	RD 2035	6	2.5	2	350	40
AM201	VLB 118	6	3	2	385	50
AM202	BCU 73	2	2.5	2	385	40
AM203	K 508	6	1	1	455	24
AM204	HBL 113	2	1	2.5	224	40
AM205	ALFA 93	2	1.5	1.5	490	50
AM206	PL 751	6	2	2	350	50
AM207	DWRB 73	2	1.5	2	357	30
AM208	K 603	6	3.5	2	238	50
AM209	BHS 169	6	3.5	2	280	50
AM210	BH 902	6	2.5	1	42	40
AM211	DWRB 92	2	2.5	1.5	217	32
AM212	SONU	6	1.5	1.5	252	24
AM213	NB 1	6	3	1.5	-	-
AM214	HUB 113 (BCU-8017)	6	1	2	350	50
AM215	BHS 400 (BCU-8019)	6	2	2	-	24
AM216	BH 885	2	1.5	2.5	350	-
AM217	SEEBE	2	2.5	1.5	-	40
AM218	H01063002 09/2S0009	6	2.5	1.5	287	40
AM219	J02006004 09/2T0095	2	1	1	224	60
AM220	J02077006 09/2T0166	2	1	2	16.8	-
AM221	J04079115 09/3T0039	2	2	2	357	50
AM222	C 50	2	1.5	2.5	455	40
AM223	Arar/H.spont.19-15//Hml/3/H.spont.41-1/Tadmor/4/Tadmor//ER/Apm	2	1	1.5	350	24
AM224	ASSI	6	2	2	490	24
AM225	CANELA/BICHY2000	6	2.5	1	294	40
AM226	IQBA07-22	6	3	2	231	40
AM227	H00010002 09/3H0006	6	2	2	231	16
AM228	Rhn-03/Alanda	6	2	1	21	30
AM229	Atahualpa/DD-21//Malt 2	6	1	1.5	420	16
AM230	Zanbaka	2	2	1.5	112	40
AM231	Zanbaka/5/Pyo/Cam//Avt/RM1508/3/Pon/4/Mona/Ben//Cam/6/Mundah	2	2.5	2	420	24
AM232	Carina/Moroc9-75//WI3257	2	1	2	266	24
AM233	Furat-3	2	2	1	294	40
AM234	6B89.2027/CHAMICO//TRADITION	6	1.5	2	294	50
AM235	Alanda-01//Atahualpa/IraqiBlack	2	2	2.5	-	40
AM236	Hooded 3	6	2.5	3	168	24
AM237	Hooded 4	6	2.5	2	-	50
AM238	Hooded 5	6	2.5	1.5	350	24
AM239	Hooded 6	6	2	1	168	16
AM240	CDC Fibar	2	2.5	2.5	350	24
AM241	CDC Candle	2	2	2	266	-
AM242	CDC Rattan	2	1	1.5	168	50
AM243	CDC Alamo	2	2.5	1.5	357	24
AM244	ARAMIR/COSSACK	2	2	2	0	24
AM245	C 8806	2	2.5	1.5	525	24
AM246	C9430	2	1.5	1.5	322	24
AM247	CLE 202	2	2	2	420	50
AM248	GoldMarker	6	2	2.5	350	16
AM249	Isaria	2	2	2	385	24
AM250	Piroline	2	2.5	2	56	24
AM251	Stirling	2	2.5	2	259	24
AM252	Harrington	2	3	2.5	294	40
AM253	Ymer	2	1.5	2	560	24
AM254	Emir	6	1.5	2	525	16
AM255	Kenia	2	2	3.5	525	24
AM256	2Ab09-X06F084-51	2	2	2	525	-
AM257	Transit	2	2	2.5	350	-
AM258	Julie	2	2.5	2.5	294	40
AM259	15UCM 49	2	2	2.5	224	40
AM260	15UCM 74	2	2	2	350	50
AM261	15UCM 64	2	2.5	2.5	322	24
AM262	15UCM 53	2	2	3	196	50
AM263	15UCM 32	2	2	3.5	5.6	40
AM264	15UCM 87	2	2	3	322	24
AM265	15UCM 59	2	1.5	2	385	40
AM266	Andreia	2	2.5	1	322	16
AM267	15UCM 16	2	2	2	322	16
AM268	15UCM 102	2	2	3	252	50
AM269	15UCM 18	2	2	2.5	350	40
AM270	15UCM 20	2	1.5	3	140	50
AM271	15UCM 67	2	2	3.5	259	50
AM272	15UCM 92	2	1.5	3.5	490	24
AM273	15UCM 88	2	2.5	2.5	350	32
AM274	15UCM34	2	2	2	294	40
AM275	15UCM 22	2	2	2.5	168	32
AM276	15UCM 47	2	1	2	112	18
AM277	15UCM9	2	2	3.5	112	16
AM278	15UCM23	2	2	3	266	24
AM279	15UCM 72	2	2	2	350	32
AM280	15UCM 92	2	2.5	2	105	16
AM281	15UCM 52	2	1.5	1.5	168	32
AM282	15UCM 17	2	1.5	3	266	40
AM283	15UCM 58	2	2.5	2.5	357	24
AM284	IG 144015	6	1	2.5	224	-
AM285	IG 144107	6	2	2.5	56	16
AM286	Filler (V Morales) (IG 144146)	6	2.5	1.5	259	40
AM287	IG 144149	6	1.5	1	378	24
AM288	IG 143951	6	3	2.5	490	40
AM289	Mari/aths*2	6	2.5	2.5	490	40
AM290	IG 24435	6	2	2	56	24
AM291	IG 26731	6	2	3	294	-
AM292	IG 26051	6	2.5	1	322	-
AM293	IG 24770	6	2	1	14	60
AM294	IG 17007	6	0.5	1	315	40
AM295	IG 24414	6	2	3	420	40
AM296	AC-6629	6	3	2.5	224	24
AM297	Alanda//Lignee527/Arar/3/BF891M-617	6	2.5	2.5	98	16
AM298	RWA.M54/3/K-247/2401-13//Vavilon/4/Meteor	6	3.5	3	266	40
AM299	RABAT 071	6	3	2.5	14	16
AM300	Arbayan/NK1272/6/CI01021/4/CM67/U.Sask.1800//Pro/CM67/3/DL70/5/Nacha2	6	2	1	378	8
AM301	MERZAGA 077	6	2.5	1	287	16
AM302	AGLOU (ER/APM"S")	2	2	2	266	24
AM303	AMALOU (CC33MS/5/NY65005-18/3/13929/NUM/ASSE/4/KBR)	6	3	2	259	40
AM304	AMIRA (WI2198/EMIR//ARAR/ESPERANCE)	6	4	2.5	168	24
AM305	TAFFA (INRA1705/MOTON)	6	2	2.5	168	16
AM306	ARIG 8	6	2.5	2.5	196	40
AM307	FIRDAWS (NK/272/RM1508/NY65005-18/3/13929/NUM/ASSE/4/KBR)	6	2.5	4	315	24
AM308	TISSA (CalsbergII*inconnue)	2	2	2	385	16
AM309	TAMELLALT (Esperance/Minerva//Brasserie-maroc)	2	2	2	420	16
AM310	ADRAR (LM1658)	2	2	3	259	24
AM311	MASSINE (INRA1705/5/NY65005-18/3/13929/NUM/ASSE/4/KBR)	6	2.5	2	455	16
AM312	BBSC/CONGONA	6	2	2	-	40
AM313	Alanda//Lignee527/Arar/3/Asal/4/AwBlack/Aths//Rhn-08/7/Man/4/Bal16/Pro//Apm/DwII-1Y/3/Api/CM67/5/Gas/OreS/6/Atahualpa	6	2.5	1	-	16
AM314	Tichedrette	2	2	2.5	420	16
AM315	CABUYA/MJA//PETUNIA1/5/PENCO/CHEVRON-BAR/3/ATACO/BERMEJO//HIGO/4/PETUNIA1	6	2.5	1	196	24
AM316	Katara//SLB34-65/Arar	6	0	1	196	24
AM317	Petunia1	6	3	1.5	322	16
AM318	Atahualpa	2	2.5	3.5	385	16
