# Supplementary material for: Genome-Wide Association Study of Leaf Rust Resistance at Seedling and Adult Plant Stages in a Global Barley Panel
Source: MDPI journal article supplement (doi:10.3390/agriculture12111829), 2022-11-01
Supplement: s1 [file s1 › agriculture-1930506-supplementary/Supplementary Table S3.xlsx]

## Sheet: Markers for Structure
	Table S3 Genetic and physical positions, polymorphic information content, and gene diversity of 2065 SNP markers selected for population structure analysis.
Serial #	Marker	Chr	Pos (POPSEQ, cM)	Positon (bp)	PIC	Gene diversity
1	JHI-Hv50k-2016-273	1	0.11	277479	0.373526	0.49706
2	BOPA1_6195-2137	1	2.34	1431782	0.315937	0.393266
3	JHI-Hv50k-2016-1691	1	3.19	1546970	0.370545	0.491167
4	JHI-Hv50k-2016-2092	1	4.11	2112412	0.37491	0.49982
5	JHI-Hv50k-2016-5448	1	4.96	4675402	0.374997	0.499995
6	BOPA2_12_30933	1	6.02	5770474	0.372722	0.495465
7	JHI-Hv50k-2016-7228	1	8.43	6249804	0.374997	0.499995
8	JHI-Hv50k-2016-7618	1	8.46	6573692	0.344092	0.441596
9	JHI-Hv50k-2016-7983	1	9.92	7424578	0.372423	0.494873
10	JHI-Hv50k-2016-8609	1	10.38	8163219	0.337709	0.43028
11	SCRI_RS_222250	1	10.91	8354814	0.357923	0.466939
12	BOPA2_12_30918	1	11.76	8935905	0.36981	0.489726
13	JHI-Hv50k-2016-9983	1	12.46	9238603	0.371549	0.493145
14	JHI-Hv50k-2016-9731	1	12.92	9087251	0.258098	0.304439
15	JHI-Hv50k-2016-10265	1	13.39	9848504	0.28426	0.343129
16	JHI-Hv50k-2016-10363	1	15.08	10246449	0.342655	0.439027
17	JHI-Hv50k-2016-10336	1	15.09	10239199	0.369879	0.48986
18	JHI-Hv50k-2016-10570	1	16.36	10963569	0.372259	0.494547
19	JHI-Hv50k-2016-11229	1	16.43	11665121	0.374937	0.499875
20	JHI-Hv50k-2016-10800	1	17.05	11212937	0.369577	0.489269
21	JHI-Hv50k-2016-11098	1	17.28	11498533	0.28884	0.350139
22	SCRI_RS_189465	1	18.82	12227429	0.374937	0.499874
23	JHI-Hv50k-2016-11910	1	19.79	12527946	0.372872	0.495762
24	JHI-Hv50k-2016-11876	1	19.83	12500454	0.371359	0.49277
25	JHI-Hv50k-2016-12802	1	21.25	13590219	0.373785	0.497577
26	JHI-Hv50k-2016-12669	1	21.69	13523367	0.367025	0.484297
27	JHI-Hv50k-2016-13154	1	23.69	14279579	0.246694	0.288234
28	SCRI_RS_117492	1	24.73	17908362	0.364467	0.47936
29	JHI-Hv50k-2016-13113	1	25.91	14209162	0.289962	0.351867
30	JHI-Hv50k-2016-13282	1	27.27	14600265	0.373302	0.496615
31	JHI-Hv50k-2016-14932	1	27.41	18642819	0.36909	0.488316
32	SCRI_RS_155382	1	27.55	18358066	0.372259	0.494547
33	JHI-Hv50k-2016-15135	1	27.86	18802952	0.37343	0.49687
34	BOPA1_5318-436	1	28.12	18359684	0.374977	0.499955
35	JHI-Hv50k-2016-14904	1	28.4	18561778	0.368139	0.486461
36	JHI-Hv50k-2016-15206	1	30.45	18848388	0.362796	0.476161
37	SCRI_RS_128285	1	31.44	22176692	0.367262	0.484757
38	JHI-Hv50k-2016-15608	1	32.15	20318440	0.36909	0.488316
39	JHI-Hv50k-2016-16150	1	34.59	22839699	0.366133	0.48257
40	JHI-Hv50k-2016-16461	1	35.69	23936886	0.37499	0.499979
41	SCRI_RS_126734	1	35.78	22837846	0.319866	0.399777
42	JHI-Hv50k-2016-16559	1	36.98	24024792	0.369646	0.489405
43	JHI-Hv50k-2016-17144	1	38.03	30795243	0.375	0.5
44	JHI-Hv50k-2016-17219	1	40.08	31208313	0.374997	0.499995
45	SCRI_RS_153785	1	41.5	33444893	0.332821	0.421762
46	JHI-Hv50k-2016-17898	1	41.64	35727509	0.37496	0.499919
47	JHI-Hv50k-2016-17993	1	41.93	36170507	0.374695	0.49939
48	JHI-Hv50k-2016-18373	1	42.35	38710671	0.373168	0.49635
49	JHI-Hv50k-2016-18381	1	43.2	38768908	0.36805	0.486287
50	JHI-Hv50k-2016-22869	1	46.46	309276492	0.373893	0.497792
51	SCRI_RS_214559	1	46.53	41878298	0.374275	0.498553
52	SCRI_RS_165215	1	47.66	561957209	0.346454	0.445842
53	JHI-Hv50k-2016-18885	1	47.83	58858031	0.374796	0.499592
54	JHI-Hv50k-2016-26957	1	47.93	370588036	0.260321	0.307643
55	JHI-Hv50k-2016-18747	1	47.94	57894042	0.374977	0.499955
56	BOPA2_12_31134	1	48.09	357285032	0.374877	0.499755
57	SCRI_RS_116685	1	48.16	360030236	0.374997	0.499995
58	SCRI_RS_158003	1	48.23	360661211	0.374997	0.499995
59	JHI-Hv50k-2016-25723	1	48.3	352321942	0.373168	0.49635
60	JHI-Hv50k-2016-21903	1	48.37	287652833	0.370962	0.491988
61	JHI-Hv50k-2016-27566	1	48.51	378441681	0.374877	0.499753
62	JHI-Hv50k-2016-21844	1	48.52	285706331	0.369128	0.48839
63	SCRI_RS_118168	1	48.76	377585383	0.374793	0.499587
64	JHI-Hv50k-2016-27562	1	49.08	378191835	0.37484	0.49968
65	JHI-Hv50k-2016-33319	1	49.24	444163022	0.374503	0.499006
66	BOPA1_7284-710	1	49.58	379465886	0.373302	0.496615
67	BOPA2_12_30243	1	49.76	389343900	0.196672	0.221118
68	SCRI_RS_198546	1	50.57	383207519	0.372339	0.494706
69	JHI-Hv50k-2016-28380	1	50.85	401043669	0.374977	0.499954
70	JHI-Hv50k-2016-28716	1	51.16	402965731	0.148469	0.161513
71	JHI-Hv50k-2016-28125	1	51.42	394740419	0.374937	0.499875
72	JHI-Hv50k-2016-29861	1	52.34	413586549	0.37499	0.49998
73	JHI-Hv50k-2016-265803	1	52.48	621058008	0.368139	0.486461
74	SCRI_RS_1445	1	52.51	410433523	0.37491	0.49982
75	SCRI_RS_193401	1	52.55	410775836	0.373997	0.497997
76	JHI-Hv50k-2016-30491	1	53.63	418913041	0.216126	0.24651
77	JHI-Hv50k-2016-33292	1	54.46	444032429	0.374574	0.499148
78	JHI-Hv50k-2016-30022	1	54.53	414511361	0.37499	0.49998
79	BOPA2_12_10201	1	54.71	428364193	0.315937	0.393266
80	JHI-Hv50k-2016-29875	1	54.89	413955003	0.37499	0.49998
81	JHI-Hv50k-2016-31090	1	54.95	422179266	0.374639	0.499279
82	JHI-Hv50k-2016-31358	1	55.13	425499908	0.363155	0.476847
83	JHI-Hv50k-2016-32385	1	55.38	432246768	0.37499	0.499979
84	JHI-Hv50k-2016-32030	1	55.45	430860379	0.372407	0.49484
85	JHI-Hv50k-2016-31529	1	55.81	427022223	0.368663	0.487482
86	JHI-Hv50k-2016-33006	1	56.02	437345403	0.300661	0.368591
87	JHI-Hv50k-2016-32394	1	56.44	432304723	0.32646	0.410864
88	JHI-Hv50k-2016-33086	1	56.51	438893078	0.369646	0.489405
89	JHI-Hv50k-2016-378036	1	56.92	18484902	0.374697	0.499394
90	JHI-Hv50k-2016-33399	1	57.29	444533274	0.374796	0.499592
91	JHI-Hv50k-2016-33266	1	57.32	443921406	0.374639	0.499279
92	JHI-Hv50k-2016-32542	1	57.76	433684624	0.274416	0.328309
93	JHI-Hv50k-2016-34151	1	58.13	450208875	0.366572	0.483418
94	JHI-Hv50k-2016-33097	1	58.22	439174674	0.374695	0.49939
95	JHI-Hv50k-2016-34012	1	58.29	449869037	0.268283	0.31924
96	JHI-Hv50k-2016-54586	1	58.75	548886606	0.210976	0.239705
97	JHI-Hv50k-2016-34594	1	59.01	453801629	0.347977	0.448597
98	JHI-Hv50k-2016-35165	1	60.84	456418960	0.37499	0.49998
99	BOPA1_7299-183	1	61.51	458916428	0.342843	0.439363
100	JHI-Hv50k-2016-35448	1	61.54	459030078	0.342871	0.439413
101	JHI-Hv50k-2016-35714	1	61.83	462188490	0.367593	0.485399
102	JHI-Hv50k-2016-35920	1	62.32	463490755	0.37484	0.49968
103	SCRI_RS_157039	1	62.57	464421881	0.361684	0.474043
104	JHI-Hv50k-2016-35395	1	62.77	458198186	0.373893	0.497792
105	JHI-Hv50k-2016-35883	1	62.82	463317375	0.37475	0.499499
106	JHI-Hv50k-2016-36284	1	63.75	466827991	0.371734	0.493511
107	JHI-Hv50k-2016-36356	1	64.74	467266774	0.367593	0.485399
108	JHI-Hv50k-2016-36460	1	65.23	469008065	0.368917	0.487978
109	BOPA2_12_10166	1	65.73	468278886	0.34871	0.449928
110	JHI-Hv50k-2016-36393	1	66.15	467878251	0.374089	0.498181
111	JHI-Hv50k-2016-36528	1	66.22	469543727	0.0966243	0.101807
112	JHI-Hv50k-2016-36848	1	66.29	472924285	0.37475	0.499499
113	JHI-Hv50k-2016-36557	1	66.73	469554173	0.116381	0.124079
114	JHI-Hv50k-2016-36605	1	66.86	469804604	0.374574	0.499148
115	SCRI_RS_160234	1	67.73	479978068	0.373168	0.49635
116	SCRI_RS_156208	1	68.77	481942863	0.374509	0.499019
117	BOPA1_5772-1176	1	69.29	482441231	0.37435	0.498702
118	JHI-Hv50k-2016-37483	1	70.25	479078121	0.373893	0.497792
119	SCRI_RS_181239	1	71.1	480725355	0.25339	0.297704
120	BOPA2_12_11267	1	71.18	481468950	0.192963	0.216372
121	JHI-Hv50k-2016-37584	1	72.52	482689583	0.330616	0.417962
122	JHI-Hv50k-2016-37756	1	73.6	491094978	0.346841	0.446541
123	JHI-Hv50k-2016-37760	1	78.58	492361105	0.121155	0.129547
124	JHI-Hv50k-2016-37874	1	80.24	493362250	0.363856	0.478189
125	JHI-Hv50k-2016-37851	1	80.63	492788423	0.160015	0.175398
126	JHI-Hv50k-2016-37898	1	80.78	493622590	0.373638	0.497283
127	JHI-Hv50k-2016-38566	1	81.73	498515697	0.374937	0.499875
128	BOPA1_34-472	1	82.12	496933333	0.374095	0.498192
129	JHI-Hv50k-2016-38723	1	82.58	498778878	0.358034	0.467148
130	JHI-Hv50k-2016-38098	1	82.94	495457023	0.365511	0.481368
131	JHI-Hv50k-2016-38828	1	83	499895780	0.367868	0.485935
132	JHI-Hv50k-2016-38321	1	83.48	497144520	0.372582	0.495188
133	SCRI_RS_236576	1	83.57	500894427	0.368917	0.487978
134	JHI-Hv50k-2016-38946	1	83.64	501297767	0.37475	0.499499
135	JHI-Hv50k-2016-38640	1	84.01	498651618	0.374977	0.499955
136	JHI-Hv50k-2016-38881	1	85.05	501000875	0.375	0.5
137	JHI-Hv50k-2016-39885	1	86.08	506349647	0.374574	0.499148
138	JHI-Hv50k-2016-39065	1	86.47	503131342	0.265671	0.315414
139	JHI-Hv50k-2016-40802	1	86.54	509275515	0.374959	0.499919
140	JHI-Hv50k-2016-41553	1	88.54	511203194	0.374275	0.498553
141	JHI-Hv50k-2016-41034	1	89.02	509585024	0.374574	0.499148
142	JHI-Hv50k-2016-40910	1	89.31	509521952	0.364866	0.480126
143	JHI-Hv50k-2016-41265	1	89.73	510257705	0.359715	0.470312
144	JHI-Hv50k-2016-41982	1	90.3	512692741	0.367025	0.484297
145	JHI-Hv50k-2016-41873	1	90.44	512548384	0.371163	0.492384
146	JHI-Hv50k-2016-42490	1	92.21	513781830	0.374577	0.499154
147	JHI-Hv50k-2016-42132	1	92.35	513140755	0.373029	0.496074
148	JHI-Hv50k-2016-42591	1	92.49	514260699	0.228206	0.262716
149	JHI-Hv50k-2016-42815	1	93.06	514928069	0.343273	0.440131
150	JHI-Hv50k-2016-43016	1	93.7	515709607	0.341622	0.43719
151	JHI-Hv50k-2016-42970	1	93.94	515694612	0.368663	0.487482
152	JHI-Hv50k-2016-43075	1	94.19	515901017	0.305182	0.375792
153	JHI-Hv50k-2016-44742	1	94.76	519277410	0.368663	0.487482
154	JHI-Hv50k-2016-43542	1	95.18	516831429	0.372708	0.495436
155	JHI-Hv50k-2016-43475	1	95.61	516753875	0.361684	0.474043
156	BOPA1_2711-234	1	95.82	517540377	0.372886	0.495789
157	JHI-Hv50k-2016-43969	1	95.86	517977319	0.374577	0.499154
158	JHI-Hv50k-2016-43900	1	95.89	517840464	0.372886	0.495789
159	JHI-Hv50k-2016-44353	1	96.74	518803235	0.369879	0.48986
160	JHI-Hv50k-2016-44590	1	96.88	519113582	0.374275	0.498553
161	JHI-Hv50k-2016-44905	1	97.52	519648766	0.366733	0.483732
162	JHI-Hv50k-2016-45022	1	97.73	519774271	0.374936	0.499872
163	JHI-Hv50k-2016-45661	1	97.84	522552451	0.374639	0.499279
164	JHI-Hv50k-2016-46627	1	99.94	524418644	0.350862	0.453854
165	BOPA2_12_31181	1	100.07	523082507	0.374436	0.498873
166	JHI-Hv50k-2016-47625	1	100.11	527539520	0.230903	0.266384
167	JHI-Hv50k-2016-46229	1	100.14	523376160	0.367822	0.485845
168	JHI-Hv50k-2016-46381	1	100.57	523967704	0.367868	0.485935
169	JHI-Hv50k-2016-47019	1	100.71	525405677	0.373029	0.496074
170	JHI-Hv50k-2016-47250	1	100.78	526117064	0.373302	0.496615
171	JHI-Hv50k-2016-45614	1	101.27	522492014	0.374959	0.499918
172	JHI-Hv50k-2016-46789	1	101.73	524656564	0.362474	0.475545
173	JHI-Hv50k-2016-47937	1	103.82	528009631	0.374931	0.499862
174	JHI-Hv50k-2016-47309	1	104.01	526252531	0.372582	0.495188
175	JHI-Hv50k-2016-48696	1	104.75	529762084	0.374637	0.499274
176	JHI-Hv50k-2016-47628	1	105.36	527540753	0.231407	0.26707
177	JHI-Hv50k-2016-47599	1	105.81	526846115	0.17403	0.192572
178	JHI-Hv50k-2016-49002	1	105.91	530532842	0.21831	0.249413
179	JHI-Hv50k-2016-48807	1	106.16	529855909	0.354885	0.46127
180	JHI-Hv50k-2016-47631	1	106.7	527649259	0.234468	0.271258
181	JHI-Hv50k-2016-49076	1	107.29	531237516	0.148469	0.161513
182	JHI-Hv50k-2016-48869	1	109.36	530071049	0.353898	0.459442
183	JHI-Hv50k-2016-49136	1	110.24	532268025	0.369879	0.48986
184	JHI-Hv50k-2016-49294	1	111.12	532903313	0.37499	0.49998
185	BOPA2_12_31511	1	111.4	1813348	0.207478	0.235119
186	JHI-Hv50k-2016-49793	1	111.55	534262683	0.161298	0.176955
187	JHI-Hv50k-2016-49438	1	111.83	533211387	0.374639	0.499279
188	JHI-Hv50k-2016-49933	1	111.99	534540566	0.200327	0.225825
189	JHI-Hv50k-2016-49722	1	112.25	533931642	0.374509	0.499019
190	JHI-Hv50k-2016-51526	1	114.57	538483983	0.313291	0.38892
191	JHI-Hv50k-2016-50263	1	116.39	535898976	0.278316	0.334141
192	JHI-Hv50k-2016-50954	1	116.5	537067636	0.374997	0.499995
193	JHI-Hv50k-2016-51019	1	116.78	537116801	0.374997	0.499995
194	JHI-Hv50k-2016-51431	1	117.49	538411545	0.372188	0.494406
195	JHI-Hv50k-2016-51564	1	117.67	538504510	0.371163	0.492384
196	JHI-Hv50k-2016-51655	1	117.85	538660204	0.37491	0.49982
197	SCRI_RS_159031	1	118.13	539092721	0.346454	0.445842
198	JHI-Hv50k-2016-51959	1	118.34	539104723	0.374796	0.499592
199	JHI-Hv50k-2016-52082	1	119.05	539694343	0.359715	0.470312
200	JHI-Hv50k-2016-52477	1	119.23	540987717	0.373997	0.497997
201	JHI-Hv50k-2016-52321	1	119.41	540715837	0.28542	0.344897
202	JHI-Hv50k-2016-52533	1	119.69	541005990	0.370268	0.490623
203	JHI-Hv50k-2016-52879	1	121.3	542682805	0.313239	0.388835
204	JHI-Hv50k-2016-52995	1	121.71	543388537	0.257581	0.303697
205	JHI-Hv50k-2016-53046	1	121.95	543762553	0.366133	0.48257
206	JHI-Hv50k-2016-52736	1	122.1	542206974	0.372259	0.494547
207	JHI-Hv50k-2016-52623	1	122.12	541997010	0.367025	0.484297
208	JHI-Hv50k-2016-53420	1	122.53	545791102	0.31942	0.399035
209	JHI-Hv50k-2016-53427	1	124.16	545843574	0.333541	0.423009
210	JHI-Hv50k-2016-54358	1	125.08	548352814	0.374432	0.498866
211	JHI-Hv50k-2016-53638	1	125.37	546840682	0.312322	0.387338
212	JHI-Hv50k-2016-53944	1	125.99	547248717	0.370936	0.491938
213	JHI-Hv50k-2016-54180	1	126.06	547774629	0.37496	0.499919
214	JHI-Hv50k-2016-54529	1	126.57	548766363	0.361213	0.473147
215	SCRI_RS_165476	1	126.97	548452630	0.374275	0.498553
216	JHI-Hv50k-2016-55083	1	128.19	550268699	0.374577	0.499154
217	JHI-Hv50k-2016-55151	1	128.33	550316682	0.374577	0.499154
218	SCRI_RS_206532	1	128.55	548750611	0.366436	0.483156
219	JHI-Hv50k-2016-54620	1	128.95	548928574	0.374697	0.499394
220	BOPA1_ABC05061-1-1-159	1	129.34	551573705	0.368622	0.487402
221	JHI-Hv50k-2016-55665	1	129.67	551613884	0.37499	0.49998
222	JHI-Hv50k-2016-55628	1	130.12	551391553	0.352409	0.456693
223	JHI-Hv50k-2016-55942	1	130.59	552981444	0.342655	0.439027
224	JHI-Hv50k-2016-56682	1	130.81	554564536	0.371734	0.493511
225	JHI-Hv50k-2016-56701	1	130.9	554602964	0.362717	0.476009
226	JHI-Hv50k-2016-56329	1	131.37	554074385	0.367162	0.484561
227	JHI-Hv50k-2016-56644	1	131.94	554554827	0.371163	0.492384
228	SCRI_RS_175218	1	132.08	556480813	0.347596	0.447905
229	JHI-Hv50k-2016-57415	1	132.37	556420134	0.374577	0.499154
230	JHI-Hv50k-2016-57152	1	132.51	555721039	0.372621	0.495265
231	JHI-Hv50k-2016-58202	1	132.72	558020501	0.362796	0.476161
232	JHI-Hv50k-2016-57547	1	132.86	556785446	0.374959	0.499919
233	SCRI_RS_219333	2	0	35977	0.374509	0.499019
234	JHI-Hv50k-2016-59426	2	0.99	1265662	0.293192	0.35687
235	JHI-Hv50k-2016-59270	2	1.98	1027793	0.374095	0.498192
236	JHI-Hv50k-2016-60404	2	2.12	2852038	0.374796	0.499592
237	BOPA2_12_31446	2	2.16	2096964	0.295426	0.360354
238	JHI-Hv50k-2016-60538	2	2.2	2960326	0.375	0.5
239	SCRI_RS_10642	2	2.27	5023326	0.355332	0.4621
240	JHI-Hv50k-2016-61614	2	3.82	4547534	0.370545	0.491167
241	JHI-Hv50k-2016-61113	2	4.01	3812672	0.116381	0.124079
242	JHI-Hv50k-2016-61289	2	4.29	4233198	0.372052	0.494138
243	JHI-Hv50k-2016-62324	2	4.53	6428637	0.374977	0.499955
244	JHI-Hv50k-2016-61157	2	4.59	3990325	0.374436	0.498873
245	JHI-Hv50k-2016-61729	2	4.9	4689465	0.249613	0.292346
246	JHI-Hv50k-2016-62968	2	5.38	8042647	0.373302	0.496615
247	JHI-Hv50k-2016-63299	2	5.52	8945111	0.358355	0.46775
248	JHI-Hv50k-2016-62455	2	5.88	6753815	0.368663	0.487482
249	JHI-Hv50k-2016-62854	2	6.3	7490455	0.179554	0.199442
250	SCRI_RS_88391	2	6.44	10900150	0.374977	0.499955
251	JHI-Hv50k-2016-63896	2	6.52	9641628	0.373302	0.496615
252	JHI-Hv50k-2016-64131	2	6.91	10388420	0.373872	0.497749
253	JHI-Hv50k-2016-65312	2	7.22	12351439	0.289351	0.350925
254	SCRI_RS_164876	2	7.44	11118072	0.374089	0.498181
255	BOPA2_12_30424	2	7.61	11270655	0.374432	0.498866
256	JHI-Hv50k-2016-64656	2	7.79	11389805	0.37343	0.49687
257	JHI-Hv50k-2016-65186	2	7.93	12213031	0.372722	0.495465
258	JHI-Hv50k-2016-63498	2	8.19	9181416	0.363856	0.478189
259	JHI-Hv50k-2016-65394	2	8.29	12693767	0.374997	0.499995
260	SCRI_RS_192552	2	8.57	12868672	0.374577	0.499154
261	JHI-Hv50k-2016-65928	2	8.85	13135603	0.310012	0.383578
262	JHI-Hv50k-2016-64557	2	9	11310450	0.372241	0.494512
263	JHI-Hv50k-2016-67550	2	9.21	15418766	0.372722	0.495465
264	JHI-Hv50k-2016-67571	2	9.35	15437024	0.374876	0.499752
265	JHI-Hv50k-2016-67901	2	10.48	16422509	0.362796	0.476161
266	JHI-Hv50k-2016-68195	2	10.94	16813871	0.351435	0.454904
267	JHI-Hv50k-2016-67965	2	11.4	16650044	0.371914	0.493866
268	JHI-Hv50k-2016-68874	2	11.61	18556167	0.124564	0.133472
269	SCRI_RS_141564	2	12.11	18589428	0.373997	0.497997
270	SCRI_RS_231806	2	12.25	18835372	0.373778	0.497561
271	JHI-Hv50k-2016-69628	2	12.54	19469597	0.349258	0.450924
272	JHI-Hv50k-2016-69616	2	12.64	19468650	0.257581	0.303697
273	JHI-Hv50k-2016-69930	2	12.75	19959058	0.374997	0.499995
274	JHI-Hv50k-2016-69235	2	13.31	18943379	0.348535	0.449609
275	JHI-Hv50k-2016-70377	2	13.46	20580400	0.367349	0.484926
276	SCRI_RS_198643	2	14.38	23189369	0.374275	0.498553
277	SCRI_RS_168461	2	14.48	21509540	0.369372	0.488869
278	SCRI_RS_159228	2	16.78	24866696	0.374997	0.499995
279	JHI-Hv50k-2016-72154	2	18.13	25566833	0.368663	0.487482
280	SCRI_RS_205712	2	18.91	25840550	0.375	0.5
281	JHI-Hv50k-2016-73141	2	19.05	28617290	0.307615	0.379702
282	JHI-Hv50k-2016-73712	2	19.9	29727848	0.366381	0.483049
283	SCRI_RS_131218	2	22.17	29839795	0.373291	0.496594
284	JHI-Hv50k-2016-74231	2	23.02	31564927	0.374697	0.499394
285	JHI-Hv50k-2016-74094	2	23.16	31204495	0.374697	0.499394
286	BOPA1_2029-1143	2	24.5	32348627	0.374877	0.499755
287	JHI-Hv50k-2016-75581	2	25.32	37727482	0.161298	0.176955
288	JHI-Hv50k-2016-75338	2	26.06	35770807	0.309091	0.382085
289	JHI-Hv50k-2016-76610	2	28.68	40851614	0.337033	0.429093
290	JHI-Hv50k-2016-76847	2	33.68	42963670	0.34225	0.438306
291	SCRI_RS_5552	2	33.85	308234181	0.31682	0.394723
292	JHI-Hv50k-2016-77415	2	37.96	46832540	0.374509	0.499019
293	JHI-Hv50k-2016-75728	2	38.07	38132306	0.34871	0.449928
294	JHI-Hv50k-2016-77472	2	38.1	47246049	0.37496	0.49992
295	JHI-Hv50k-2016-77669	2	39.09	48229930	0.263017	0.311549
296	JHI-Hv50k-2016-76569	2	39.21	39982873	0.373291	0.496594
297	JHI-Hv50k-2016-77818	2	39.38	49749337	0.37481	0.49962
298	BOPA1_2964-382	2	39.66	50467754	0.375	0.5
299	BOPA1_6338-682	2	40.09	51957324	0.374509	0.499019
300	BOPA1_7623-818	2	40.16	52014030	0.372423	0.494873
301	JHI-Hv50k-2016-78424	2	40.23	51928516	0.360121	0.471078
302	JHI-Hv50k-2016-76651	2	40.33	41250237	0.337457	0.429836
303	JHI-Hv50k-2016-78639	2	40.37	52893033	0.374997	0.499995
304	JHI-Hv50k-2016-79149	2	40.79	54790156	0.373302	0.496615
305	JHI-Hv50k-2016-77038	2	40.89	44786265	0.373017	0.496049
306	JHI-Hv50k-2016-79131	2	41.22	54787893	0.37499	0.49998
307	JHI-Hv50k-2016-77334	2	41.44	45847354	0.352892	0.457583
308	JHI-Hv50k-2016-79404	2	41.86	57647943	0.37496	0.49992
309	SCRI_RS_135619	2	43.62	53459453	0.374266	0.498534
310	JHI-Hv50k-2016-78857	2	44.16	53903404	0.371734	0.493511
311	JHI-Hv50k-2016-79994	2	44.69	60581847	0.350862	0.453854
312	JHI-Hv50k-2016-77607	2	45.22	47924451	0.269573	0.321137
313	JHI-Hv50k-2016-80336	2	45.74	65412460	0.354552	0.460652
314	JHI-Hv50k-2016-80527	2	46.77	66381564	0.374796	0.499592
315	JHI-Hv50k-2016-80482	2	47.28	65981072	0.339042	0.432623
316	JHI-Hv50k-2016-80633	2	47.78	67505084	0.365825	0.481974
317	JHI-Hv50k-2016-81372	2	48.44	75777178	0.373302	0.496615
318	JHI-Hv50k-2016-81297	2	48.58	74594219	0.374188	0.498378
319	JHI-Hv50k-2016-81332	2	48.8	74788329	0.360914	0.472581
320	JHI-Hv50k-2016-81421	2	49.43	76447452	0.374977	0.499955
321	JHI-Hv50k-2016-80907	2	49.73	72243329	0.374977	0.499955
322	SCRI_RS_239231	2	49.75	76954511	0.37499	0.49998
323	JHI-Hv50k-2016-81878	2	50.07	78910212	0.37499	0.49998
324	JHI-Hv50k-2016-81840	2	50.35	78374908	0.374937	0.499874
325	JHI-Hv50k-2016-81429	2	50.42	76510829	0.375	0.5
326	JHI-Hv50k-2016-81491	2	50.78	77271705	0.37496	0.49992
327	JHI-Hv50k-2016-83435	2	50.92	89583080	0.37496	0.49992
328	JHI-Hv50k-2016-84178	2	51.49	94763927	0.374997	0.499995
329	BOPA1_5379-595	2	51.84	94908103	0.34203	0.437914
330	JHI-Hv50k-2016-84516	2	52.2	96160663	0.366436	0.483156
331	JHI-Hv50k-2016-87978	2	52.52	128351383	0.133525	0.143875
332	JHI-Hv50k-2016-85724	2	53.19	107639072	0.371734	0.493511
333	JHI-Hv50k-2016-85810	2	53.22	108402884	0.369646	0.489405
334	JHI-Hv50k-2016-104098	2	53.48	635867055	0.34203	0.437914
335	JHI-Hv50k-2016-86431	2	53.68	113044461	0.368139	0.486461
336	SCRI_RS_155546	2	53.75	113639907	0.37499	0.49998
337	BOPA1_8889-842	2	53.79	132767421	0.35671	0.464669
338	JHI-Hv50k-2016-86743	2	54.25	114954955	0.268283	0.31924
339	SCRI_RS_103572	2	54.39	157579338	0.368361	0.486893
340	JHI-Hv50k-2016-86920	2	55.01	116057536	0.374997	0.499995
341	JHI-Hv50k-2016-87662	2	55.53	123139595	0.327571	0.412754
342	JHI-Hv50k-2016-89269	2	55.56	153969048	0.244243	0.284799
343	JHI-Hv50k-2016-91201	2	55.59	221773839	0.373554	0.497116
344	JHI-Hv50k-2016-89680	2	55.63	166772784	0.37475	0.499499
345	BOPA1_411-495	2	55.67	197904597	0.374937	0.499873
346	BOPA1_ABC01644-1-3-379	2	55.95	205975238	0.37475	0.499499
347	BOPA1_4630-1036	2	56.09	165634886	0.37091	0.491886
348	JHI-Hv50k-2016-91390	2	56.37	234392747	0.374358	0.498718
349	JHI-Hv50k-2016-90954	2	56.52	202967834	0.373997	0.497997
350	JHI-Hv50k-2016-91131	2	56.62	212462186	0.362431	0.475465
351	JHI-Hv50k-2016-91125	2	56.66	211507009	0.37475	0.499499
352	JHI-Hv50k-2016-91495	2	56.73	235948766	0.374509	0.499019
353	JHI-Hv50k-2016-91257	2	56.87	230223454	0.373554	0.497116
354	JHI-Hv50k-2016-91028	2	57.01	205855845	0.368663	0.487482
355	JHI-Hv50k-2016-91226	2	57.05	224822554	0.373664	0.497334
356	JHI-Hv50k-2016-90815	2	57.15	197071852	0.370106	0.490306
357	JHI-Hv50k-2016-89707	2	57.22	167096509	0.374639	0.499279
358	JHI-Hv50k-2016-93670	2	57.58	456749952	0.125865	0.134974
359	JHI-Hv50k-2016-91144	2	57.72	214721799	0.373997	0.497997
360	JHI-Hv50k-2016-90638	2	57.86	193498707	0.370298	0.490683
361	JHI-Hv50k-2016-89723	2	58	167385364	0.374697	0.499394
362	JHI-Hv50k-2016-92462	2	58.05	361827140	0.368663	0.487482
363	JHI-Hv50k-2016-297867	2	58.07	317170450	0.375	0.5
364	JHI-Hv50k-2016-89286	2	58.28	155955153	0.368663	0.487482
365	JHI-Hv50k-2016-89822	2	58.64	168071302	0.374639	0.499279
366	JHI-Hv50k-2016-93148	2	58.66	432905090	0.35486	0.461224
367	BOPA2_12_20861	2	58.67	510431182	0.324405	0.407387
368	JHI-Hv50k-2016-90058	2	58.68	173218954	0.373302	0.496615
369	JHI-Hv50k-2016-507910	2	58.69	635205328	0.367593	0.485399
370	JHI-Hv50k-2016-90437	2	58.71	185344286	0.135094	0.14571
371	JHI-Hv50k-2016-92837	2	58.78	403313659	0.37499	0.49998
372	JHI-Hv50k-2016-91815	2	58.85	250266168	0.366436	0.483156
373	JHI-Hv50k-2016-91451	2	58.92	235356262	0.372089	0.494212
374	SCRI_RS_173145	2	59.07	132035921	0.36668	0.483628
375	JHI-Hv50k-2016-100152	2	59.17	604033148	0.157082	0.171847
376	JHI-Hv50k-2016-86885	2	59.21	115544238	0.374089	0.498181
377	JHI-Hv50k-2016-98990	2	59.35	570839933	0.374997	0.499995
378	JHI-Hv50k-2016-99004	2	59.42	573154740	0.37496	0.49992
379	JHI-Hv50k-2016-89203	2	59.56	150903868	0.367593	0.485399
380	JHI-Hv50k-2016-99929	2	59.95	586099829	0.370936	0.491938
381	JHI-Hv50k-2016-100426	2	60.87	607338581	0.319891	0.399819
382	JHI-Hv50k-2016-100999	2	61.98	612012139	0.365825	0.481974
383	BOPA1_6804-1197	2	62.04	590822206	0.366436	0.483156
384	JHI-Hv50k-2016-99984	2	62.46	589508522	0.374639	0.499279
385	JHI-Hv50k-2016-100794	2	62.49	611117590	0.374271	0.498544
386	JHI-Hv50k-2016-101516	2	63.63	617257732	0.37484	0.49968
387	JHI-Hv50k-2016-100937	2	64.59	611959025	0.37499	0.49998
388	JHI-Hv50k-2016-101735	2	64.73	618671917	0.347596	0.447905
389	JHI-Hv50k-2016-102148	2	64.87	620231732	0.358463	0.467954
390	JHI-Hv50k-2016-102158	2	65	620289122	0.237156	0.274956
391	JHI-Hv50k-2016-102223	2	65.37	620615023	0.305182	0.375792
392	JHI-Hv50k-2016-102289	2	65.83	620806132	0.363434	0.47738
393	JHI-Hv50k-2016-102425	2	66.36	620958023	0.373029	0.496074
394	JHI-Hv50k-2016-102396	2	66.43	620951946	0.339042	0.432623
395	BOPA2_12_31383	2	66.45	620408210	0.363509	0.477523
396	JHI-Hv50k-2016-102530	2	66.71	621116966	0.37475	0.499499
397	SCRI_RS_150266	2	66.93	621090749	0.366133	0.48257
398	JHI-Hv50k-2016-102798	2	67.35	623320711	0.373535	0.497079
399	JHI-Hv50k-2016-102972	2	67.49	624657645	0.374977	0.499955
400	JHI-Hv50k-2016-103057	2	67.92	625541034	0.374997	0.499994
401	JHI-Hv50k-2016-103868	2	68.56	633763055	0.372567	0.495157
402	SCRI_RS_172667	2	70.82	637003220	0.37475	0.499499
403	JHI-Hv50k-2016-104650	2	71.65	638687907	0.370106	0.490306
404	JHI-Hv50k-2016-104514	2	72.45	638564779	0.338131	0.43102
405	JHI-Hv50k-2016-104828	2	72.59	639288085	0.374639	0.499279
406	JHI-Hv50k-2016-105276	2	72.72	641738279	0.306648	0.378145
407	JHI-Hv50k-2016-105050	2	73.05	640266415	0.371686	0.493416
408	JHI-Hv50k-2016-105697	2	73.25	644660328	0.370106	0.490306
409	JHI-Hv50k-2016-104699	2	73.51	638902015	0.374509	0.499019
410	JHI-Hv50k-2016-105320	2	73.73	641997219	0.374639	0.499279
411	JHI-Hv50k-2016-105653	2	73.79	644169239	0.369372	0.488869
412	JHI-Hv50k-2016-106061	2	74.08	645390195	0.361213	0.473147
413	JHI-Hv50k-2016-105525	2	74.11	643535273	0.357599	0.466332
414	JHI-Hv50k-2016-105384	2	74.15	642679147	0.374959	0.499918
415	JHI-Hv50k-2016-106126	2	75.57	645578408	0.374937	0.499874
416	JHI-Hv50k-2016-106171	2	75.81	645955376	0.374797	0.499594
417	JHI-Hv50k-2016-106377	2	76.06	647317565	0.37484	0.49968
418	JHI-Hv50k-2016-106267	2	76.2	646876805	0.371734	0.493511
419	JHI-Hv50k-2016-106554	2	76.77	648053729	0.369646	0.489405
420	JHI-Hv50k-2016-106749	2	76.91	648513853	0.37484	0.49968
421	JHI-Hv50k-2016-107708	2	77.43	652251444	0.293268	0.356989
422	JHI-Hv50k-2016-107038	2	77.93	649735111	0.36668	0.483628
423	JHI-Hv50k-2016-106783	2	78.33	649311585	0.371875	0.493788
424	JHI-Hv50k-2016-107311	2	79.39	650225707	0.343675	0.44085
425	BOPA2_12_30897	2	79.89	652031329	0.37496	0.49992
426	JHI-Hv50k-2016-107664	2	80.03	651676578	0.37499	0.49998
427	JHI-Hv50k-2016-108358	2	80.1	655545177	0.374875	0.49975
428	JHI-Hv50k-2016-107864	2	80.17	653526322	0.373017	0.496049
429	JHI-Hv50k-2016-107997	2	80.38	654125881	0.367337	0.484902
430	JHI-Hv50k-2016-108035	2	80.59	654161868	0.361684	0.474043
431	JHI-Hv50k-2016-107970	2	80.74	653940342	0.340346	0.434926
432	JHI-Hv50k-2016-108250	2	80.88	655481375	0.373886	0.497778
433	JHI-Hv50k-2016-108241	2	80.91	655480078	0.373872	0.497749
434	JHI-Hv50k-2016-108204	2	81.23	655349005	0.312322	0.387338
435	JHI-Hv50k-2016-108518	2	81.52	656188908	0.374997	0.499995
436	SCRI_RS_185505	2	81.8	656412102	0.37499	0.49998
437	SCRI_RS_182039	2	82.08	662300246	0.370545	0.491167
438	JHI-Hv50k-2016-108797	2	82.29	658831583	0.373997	0.497997
439	BOPA2_12_10936	2	82.51	659264767	0.374997	0.499995
440	BOPA2_12_20793	2	83.38	39718323	0.217818	0.248758
441	JHI-Hv50k-2016-109430	2	85.85	669741446	0.351384	0.45481
442	JHI-Hv50k-2016-109865	2	86.61	673053023	0.374095	0.498192
443	JHI-Hv50k-2016-109924	2	87.57	673522487	0.372423	0.494873
444	JHI-Hv50k-2016-109934	2	88.39	673529240	0.332821	0.421762
445	SCRI_RS_165509	2	88.53	246836054	0.372089	0.494212
446	SCRI_RS_154111	2	88.79	314025160	0.328344	0.414071
447	JHI-Hv50k-2016-110163	2	89.66	674306695	0.371914	0.493866
448	SCRI_RS_140972	2	89.77	680389013	0.365191	0.480752
449	JHI-Hv50k-2016-110889	2	89.8	677313102	0.37496	0.49992
450	JHI-Hv50k-2016-111314	2	90.72	679384668	0.375	0.5
451	JHI-Hv50k-2016-111822	2	91.01	681290695	0.37491	0.49982
452	JHI-Hv50k-2016-113598	2	92.31	687349885	0.35486	0.461224
453	JHI-Hv50k-2016-113288	2	92.71	685910014	0.374639	0.499279
454	JHI-Hv50k-2016-112097	2	92.78	682197924	0.35659	0.464444
455	JHI-Hv50k-2016-113553	2	93.69	687151554	0.374937	0.499874
456	JHI-Hv50k-2016-112114	2	94.26	682222535	0.249099	0.29162
457	JHI-Hv50k-2016-113633	2	94.66	687578368	0.367593	0.485399
458	SCRI_RS_142188	2	94.69	684036885	0.374877	0.499755
459	JHI-Hv50k-2016-113655	2	95.16	687584504	0.371527	0.493102
460	JHI-Hv50k-2016-113891	2	95.66	688030142	0.374639	0.499279
461	JHI-Hv50k-2016-114963	2	96.15	691997316	0.366436	0.483156
462	JHI-Hv50k-2016-113997	2	96.65	688270453	0.374509	0.499019
463	JHI-Hv50k-2016-115706	2	99.57	694020046	0.363359	0.477235
464	JHI-Hv50k-2016-115446	2	100.54	693341778	0.363155	0.476847
465	SCRI_RS_227965	2	102.04	695298283	0.373526	0.49706
466	JHI-Hv50k-2016-116579	2	104.06	696377672	0.334254	0.424246
467	JHI-Hv50k-2016-116258	2	104.59	695896645	0.374188	0.498378
468	JHI-Hv50k-2016-116224	2	105.08	695865103	0.351746	0.455475
469	BOPA1_2277-634	2	105.56	697331699	0.368403	0.486976
470	JHI-Hv50k-2016-118511	2	106.53	702269767	0.374977	0.499955
471	JHI-Hv50k-2016-119259	2	107.26	704556796	0.37399	0.497984
472	JHI-Hv50k-2016-119229	2	107.36	704392546	0.374937	0.499874
473	JHI-Hv50k-2016-117736	2	107.37	700173748	0.374976	0.499952
474	JHI-Hv50k-2016-119451	2	107.49	704979653	0.35671	0.464669
475	JHI-Hv50k-2016-119679	2	107.93	705822095	0.37484	0.49968
476	SCRI_RS_171852	2	108	705662700	0.370545	0.491167
477	JHI-Hv50k-2016-119963	2	108.22	706471431	0.37491	0.49982
478	JHI-Hv50k-2016-120158	2	108.5	707072146	0.214422	0.244252
479	JHI-Hv50k-2016-120127	2	108.78	706966891	0.367593	0.485399
480	JHI-Hv50k-2016-120485	2	109.28	707643181	0.370545	0.491167
481	JHI-Hv50k-2016-120639	2	109.42	708253750	0.37484	0.49968
482	JHI-Hv50k-2016-120297	2	109.56	707543879	0.312322	0.387338
483	JHI-Hv50k-2016-120667	2	109.77	708297511	0.374358	0.498718
484	BOPA1_7576-818	2	110.2	708638034	0.374358	0.498718
485	JHI-Hv50k-2016-121037	2	111.26	709160717	0.372423	0.494873
486	JHI-Hv50k-2016-121126	2	112.18	709326556	0.372241	0.494512
487	JHI-Hv50k-2016-121151	2	112.32	709349078	0.367025	0.484297
488	JHI-Hv50k-2016-122275	2	113.31	711164880	0.360121	0.471078
489	JHI-Hv50k-2016-122713	2	113.42	712345331	0.111541	0.118571
490	JHI-Hv50k-2016-122449	2	113.53	711656287	0.365825	0.481974
491	JHI-Hv50k-2016-122220	2	113.88	711116734	0.374997	0.499995
492	JHI-Hv50k-2016-122403	2	113.92	711435670	0.106636	0.113023
493	BOPA2_12_30636	2	113.95	712677252	0.346454	0.445842
494	JHI-Hv50k-2016-122831	2	114.09	712754147	0.37484	0.49968
495	JHI-Hv50k-2016-124562	2	114.31	715933490	0.332093	0.420506
496	JHI-Hv50k-2016-126036	2	114.38	718962785	0.37499	0.49998
497	JHI-Hv50k-2016-124089	2	114.45	714094049	0.169556	0.187049
498	SCRI_RS_116197	2	114.94	713305554	0.373664	0.497334
499	JHI-Hv50k-2016-124385	2	115.16	715380972	0.37491	0.49982
500	JHI-Hv50k-2016-124405	2	116.43	715385198	0.374188	0.498378
501	JHI-Hv50k-2016-124112	2	117.11	714102734	0.345287	0.443739
502	JHI-Hv50k-2016-124285	2	118.07	714780165	0.152806	0.1667
503	SCRI_RS_708	2	118.7	718339896	0.369646	0.489405
504	JHI-Hv50k-2016-125845	2	119.03	718434772	0.37491	0.49982
505	JHI-Hv50k-2016-126337	2	119.76	719740314	0.130511	0.140362
506	JHI-Hv50k-2016-126360	2	120.04	719876093	0.263017	0.311549
507	JHI-Hv50k-2016-127160	2	120.68	721665614	0.375	0.5
508	JHI-Hv50k-2016-127867	2	120.75	724202574	0.360521	0.471834
509	JHI-Hv50k-2016-127720	2	122.86	723371810	0.373672	0.497351
510	JHI-Hv50k-2016-128451	2	123.65	725230494	0.374188	0.498378
511	JHI-Hv50k-2016-128068	2	123.81	724707109	0.374316	0.498633
512	SCRI_RS_238605	2	123.94	725523910	0.373997	0.497997
513	JHI-Hv50k-2016-128918	2	124.47	726011296	0.353898	0.459442
514	SCRI_RS_202469	2	124.65	726971542	0.370729	0.491529
515	JHI-Hv50k-2016-129984	2	124.79	727650229	0.374936	0.499872
516	JHI-Hv50k-2016-129366	2	124.93	726904116	0.356134	0.463593
517	JHI-Hv50k-2016-130223	2	125.21	728240034	0.374077	0.498158
518	SCRI_RS_11645	2	126.77	729917528	0.374746	0.499493
519	JHI-Hv50k-2016-130867	2	127.05	729558530	0.372737	0.495494
520	JHI-Hv50k-2016-131068	2	127.19	730852717	0.260321	0.307643
521	JHI-Hv50k-2016-131621	2	127.2	732635281	0.367025	0.484297
522	JHI-Hv50k-2016-131503	2	128.6	732544597	0.332093	0.420506
523	JHI-Hv50k-2016-132440	2	129.07	733926337	0.209785	0.238141
524	JHI-Hv50k-2016-131717	2	129.32	732704168	0.374877	0.499753
525	JHI-Hv50k-2016-131741	2	129.55	732708605	0.372737	0.495494
526	JHI-Hv50k-2016-132415	2	129.78	733917652	0.374608	0.499216
527	BOPA1_3608-2133	2	129.82	733665592	0.374997	0.499995
528	JHI-Hv50k-2016-132763	2	130.31	734858477	0.372259	0.494547
529	JHI-Hv50k-2016-132811	2	131.02	735081531	0.372423	0.494873
530	BOPA2_12_31209	2	131.87	735228887	0.372423	0.494873
531	BOPA1_6157-1233	2	132.15	737661735	0.372423	0.494873
532	JHI-Hv50k-2016-133841	2	132.58	738326718	0.369165	0.488463
533	BOPA1_3910-1648	2	133.29	739142893	0.374089	0.498181
534	SCRI_RS_226193	2	134.99	740677306	0.37496	0.49992
535	JHI-Hv50k-2016-134947	2	135.16	740892231	0.342871	0.439413
536	JHI-Hv50k-2016-135102	2	135.34	741037594	0.374695	0.49939
537	JHI-Hv50k-2016-136007	2	135.69	742632512	0.367025	0.484297
538	JHI-Hv50k-2016-136072	2	135.76	742794992	0.368187	0.486554
539	JHI-Hv50k-2016-136859	2	136.05	744438837	0.278316	0.334141
540	JHI-Hv50k-2016-134353	2	136.26	739466696	0.367545	0.485306
541	JHI-Hv50k-2016-136960	2	136.4	744660594	0.361684	0.474043
542	SCRI_RS_204274	2	136.62	744575473	0.370545	0.491167
543	JHI-Hv50k-2016-137127	2	136.83	744899470	0.371359	0.49277
544	JHI-Hv50k-2016-134323	2	137.43	739332214	0.357253	0.465683
545	JHI-Hv50k-2016-137264	2	137.68	745004616	0.333541	0.423009
546	JHI-Hv50k-2016-137369	2	138.03	745320358	0.337283	0.429532
547	JHI-Hv50k-2016-137740	2	138.46	746482892	0.355332	0.4621
548	JHI-Hv50k-2016-138040	2	138.53	747296729	0.374506	0.499012
549	JHI-Hv50k-2016-137912	2	138.6	746991462	0.369299	0.488726
550	JHI-Hv50k-2016-138169	2	139.59	747543338	0.374358	0.498718
551	JHI-Hv50k-2016-141465	2	140.07	754624512	0.369165	0.488463
552	JHI-Hv50k-2016-138752	2	140.51	749753425	0.374574	0.499148
553	JHI-Hv50k-2016-138290	2	140.58	748177943	0.292683	0.35608
554	BOPA1_570-1376	2	140.79	750535067	0.37496	0.49992
555	JHI-Hv50k-2016-139334	2	141.5	750812375	0.374977	0.499955
556	JHI-Hv50k-2016-139304	2	141.57	750764284	0.289962	0.351867
557	BOPA2_12_31527	2	141.78	752961391	0.375	0.5
558	JHI-Hv50k-2016-140579	2	141.86	753099360	0.345287	0.443739
559	JHI-Hv50k-2016-141429	2	141.93	754603743	0.370729	0.491529
560	JHI-Hv50k-2016-141568	2	142.35	754648076	0.374796	0.499592
561	BOPA2_12_31180	2	144.26	755196313	0.368917	0.487978
562	JHI-Hv50k-2016-142984	2	145.61	758307325	0.367545	0.485306
563	JHI-Hv50k-2016-143149	2	146.1	758369280	0.349631	0.451605
564	JHI-Hv50k-2016-143262	2	146.25	758401785	0.370906	0.491878
565	JHI-Hv50k-2016-142592	2	146.32	757213746	0.331504	0.41949
566	JHI-Hv50k-2016-143696	2	146.39	758824183	0.374509	0.499019
567	JHI-Hv50k-2016-143614	2	146.46	758684801	0.125865	0.134974
568	SCRI_RS_140931	2	146.53	759834094	0.369879	0.48986
569	JHI-Hv50k-2016-159205	2	146.88	23389351	0.121819	0.13031
570	SCRI_RS_170753	2	147.31	760113749	0.374436	0.498873
571	JHI-Hv50k-2016-145709	2	147.38	761623717	0.315046	0.391799
572	JHI-Hv50k-2016-147080	2	149.15	764421012	0.374977	0.499955
573	JHI-Hv50k-2016-148133	2	149.29	767327396	0.370106	0.490306
574	JHI-Hv50k-2016-148247	2	149.5	767940532	0.370328	0.490742
575	JHI-Hv50k-2016-149450	3	0	1655801	0.374509	0.499019
576	JHI-Hv50k-2016-148739	3	0.04	641276	0.374997	0.499995
577	JHI-Hv50k-2016-149144	3	0.07	1321157	0.373886	0.497778
578	JHI-Hv50k-2016-149871	3	0.85	2010756	0.252486	0.296417
579	JHI-Hv50k-2016-149655	3	1.77	1817107	0.371606	0.493257
580	JHI-Hv50k-2016-362716	3	1.91	661053756	0.374877	0.499755
581	JHI-Hv50k-2016-151820	3	2.41	4569804	0.352259	0.456417
582	BOPA1_1831-241	3	2.55	3868857	0.37493	0.49986
583	JHI-Hv50k-2016-151291	3	2.69	3899653	0.374997	0.499994
584	JHI-Hv50k-2016-152172	3	2.97	6811075	0.346454	0.445842
585	JHI-Hv50k-2016-152539	3	3.05	7321696	0.35671	0.464669
586	JHI-Hv50k-2016-152440	3	3.12	6984695	0.238088	0.276243
587	JHI-Hv50k-2016-152690	3	3.26	7532933	0.37484	0.49968
588	JHI-Hv50k-2016-150703	3	4.22	3246296	0.349251	0.450911
589	BOPA2_12_30297	3	5.31	7847809	0.374639	0.499279
590	JHI-Hv50k-2016-153330	3	6.37	8646157	0.369165	0.488463
591	JHI-Hv50k-2016-153218	3	7.01	8183470	0.237156	0.274956
592	SCRI_RS_132388	3	8.5	9094603	0.364535	0.47949
593	JHI-Hv50k-2016-153137	3	8.51	8166698	0.125865	0.134974
594	SCRI_RS_193258	3	8.78	11634351	0.37499	0.49998
595	JHI-Hv50k-2016-154642	3	8.92	13092523	0.371359	0.49277
596	JHI-Hv50k-2016-153181	3	9.06	8177742	0.337709	0.43028
597	JHI-Hv50k-2016-154958	3	9.24	13630703	0.207478	0.235119
598	JHI-Hv50k-2016-153085	3	9.56	8085099	0.374188	0.498378
599	JHI-Hv50k-2016-153584	3	9.62	10206745	0.317695	0.39617
600	JHI-Hv50k-2016-154833	3	10.55	13456202	0.373535	0.497079
601	JHI-Hv50k-2016-154553	3	11.87	13053070	0.258098	0.304439
602	JHI-Hv50k-2016-158407	3	13.22	19998048	0.329109	0.415378
603	JHI-Hv50k-2016-155109	3	14.17	14026516	0.375	0.5
604	JHI-Hv50k-2016-156660	3	14.87	17404752	0.372423	0.494873
605	SCRI_RS_8644	3	15.01	17460146	0.37499	0.49998
606	JHI-Hv50k-2016-156893	3	15.3	17613222	0.37484	0.49968
607	JHI-Hv50k-2016-155465	3	16.49	15156507	0.374793	0.499587
608	JHI-Hv50k-2016-157075	3	17.35	17888920	0.365127	0.48063
609	JHI-Hv50k-2016-157160	3	18.83	17953416	0.368187	0.486554
610	JHI-Hv50k-2016-157421	3	20	18004737	0.337201	0.429389
611	JHI-Hv50k-2016-158466	3	20.4	20724059	0.363509	0.477523
612	JHI-Hv50k-2016-158346	3	20.57	19823651	0.362796	0.476161
613	JHI-Hv50k-2016-158891	3	23.09	23158274	0.374358	0.498718
614	JHI-Hv50k-2016-158230	3	23.51	19403543	0.369612	0.489337
615	BOPA1_4701-2395	3	23.94	23309513	0.370756	0.491583
616	JHI-Hv50k-2016-158413	3	24.1	20000028	0.362796	0.476161
617	JHI-Hv50k-2016-158610	3	24.68	21657071	0.358034	0.467148
618	JHI-Hv50k-2016-159904	3	24.72	25111300	0.373157	0.496327
619	SCRI_RS_177084	3	25.28	25260299	0.372567	0.495157
620	JHI-Hv50k-2016-160232	3	25.39	26399514	0.305672	0.376577
621	JHI-Hv50k-2016-160096	3	25.5	25862750	0.375	0.5
622	JHI-Hv50k-2016-158676	3	25.83	22515912	0.367312	0.484853
623	JHI-Hv50k-2016-159174	3	26.98	23382124	0.374358	0.498718
624	SCRI_RS_204148	3	28.29	28820397	0.368139	0.486461
625	JHI-Hv50k-2016-160164	3	30.38	26174877	0.364058	0.478574
626	JHI-Hv50k-2016-407027	3	31.15	460087951	0.329109	0.415378
627	JHI-Hv50k-2016-161024	3	33.66	28079061	0.37491	0.49982
628	JHI-Hv50k-2016-161301	3	35.13	31379939	0.161298	0.176955
629	SCRI_RS_230486	3	36.4	31216367	0.314146	0.390322
630	JHI-Hv50k-2016-161336	3	36.47	31653014	0.202134	0.228164
631	JHI-Hv50k-2016-161238	3	36.76	30935818	0.307615	0.379702
632	JHI-Hv50k-2016-160532	3	36.79	27375079	0.261356	0.30914
633	JHI-Hv50k-2016-161331	3	36.83	31649305	0.155754	0.170245
634	JHI-Hv50k-2016-161342	3	36.9	31937651	0.31103	0.385232
635	JHI-Hv50k-2016-162083	3	37.04	33513715	0.37499	0.49998
636	JHI-Hv50k-2016-162677	3	37.39	36388060	0.374977	0.499955
637	JHI-Hv50k-2016-162717	3	37.43	36651520	0.374797	0.499594
638	JHI-Hv50k-2016-162731	3	37.61	36656830	0.375	0.5
639	SCRI_RS_174984	3	37.75	36771559	0.374095	0.498192
640	JHI-Hv50k-2016-162573	3	37.89	35723398	0.374797	0.499594
641	JHI-Hv50k-2016-161147	3	38.28	29998535	0.0915171	0.0961384
642	BOPA2_12_31159	3	38.77	36987723	0.139614	0.151017
643	JHI-Hv50k-2016-162863	3	39.16	37639826	0.268283	0.31924
644	JHI-Hv50k-2016-163675	3	39.45	41439689	0.368139	0.486461
645	JHI-Hv50k-2016-163367	3	39.52	39490425	0.374997	0.499995
646	JHI-Hv50k-2016-163990	3	39.59	43839622	0.371713	0.493469
647	JHI-Hv50k-2016-163961	3	40.58	43675500	0.374266	0.498534
648	JHI-Hv50k-2016-164180	3	40.62	44577323	0.364866	0.480126
649	JHI-Hv50k-2016-163720	3	41.56	41738544	0.357158	0.465505
650	JHI-Hv50k-2016-164109	3	42.44	44327854	0.374697	0.499394
651	JHI-Hv50k-2016-163623	3	42.86	41041742	0.353759	0.459184
652	JHI-Hv50k-2016-164364	3	43.09	46394837	0.321113	0.401859
653	BOPA1_9018-522	3	43.13	47570630	0.347596	0.447905
654	JHI-Hv50k-2016-164264	3	43.69	45314385	0.324405	0.407387
655	BOPA2_12_30785	3	44.09	49677532	0.332533	0.421265
656	JHI-Hv50k-2016-164467	3	44.26	48841246	0.347596	0.447905
657	JHI-Hv50k-2016-165211	3	45.82	75133844	0.374977	0.499955
658	JHI-Hv50k-2016-165924	3	46.32	82847337	0.373017	0.496049
659	JHI-Hv50k-2016-166048	3	46.35	104722801	0.17403	0.192572
660	JHI-Hv50k-2016-166004	3	46.88	102068365	0.207478	0.235119
661	JHI-Hv50k-2016-166392	3	47.1	130790360	0.369408	0.488939
662	JHI-Hv50k-2016-166224	3	47.15	107213241	0.196672	0.221118
663	JHI-Hv50k-2016-166354	3	48.11	119246584	0.125865	0.134974
664	JHI-Hv50k-2016-166955	3	48.62	147613350	0.177582	0.196984
665	JHI-Hv50k-2016-164652	3	48.71	51060834	0.234053	0.27069
666	JHI-Hv50k-2016-166854	3	49.13	144876884	0.177582	0.196984
667	JHI-Hv50k-2016-166817	3	49.29	143211194	0.37499	0.49998
668	JHI-Hv50k-2016-167198	3	49.68	165033159	0.335657	0.426689
669	JHI-Hv50k-2016-167364	3	49.72	169956751	0.37496	0.49992
670	BOPA1_ConsensusGBS0508-1	3	50.11	186950158	0.370936	0.491938
671	JHI-Hv50k-2016-167178	3	50.14	164620074	0.339876	0.434095
672	JHI-Hv50k-2016-167669	3	50.5	173447271	0.37496	0.49992
673	JHI-Hv50k-2016-167465	3	50.59	170989167	0.228206	0.262716
674	BOPA2_12_31008	3	50.71	183438724	0.344693	0.442672
675	JHI-Hv50k-2016-407516	3	50.98	464560521	0.176033	0.195057
676	JHI-Hv50k-2016-168893	3	51.2	203953584	0.374089	0.498181
677	JHI-Hv50k-2016-168921	3	51.27	206059717	0.37484	0.49968
678	JHI-Hv50k-2016-167832	3	51.28	180392187	0.367593	0.485399
679	SCRI_RS_165264	3	51.35	353175383	0.374937	0.499874
680	JHI-Hv50k-2016-180452	3	51.45	442172598	0.374874	0.499748
681	JHI-Hv50k-2016-167864	3	51.48	180893272	0.371138	0.492336
682	JHI-Hv50k-2016-170197	3	51.56	233011291	0.374997	0.499995
683	JHI-Hv50k-2016-182807	3	51.63	483533250	0.375	0.5
684	JHI-Hv50k-2016-179748	3	51.67	431181312	0.237156	0.274956
685	JHI-Hv50k-2016-181539	3	51.7	460765532	0.373672	0.497351
686	JHI-Hv50k-2016-182723	3	51.77	481481316	0.37499	0.49998
687	JHI-Hv50k-2016-180598	3	52.01	444128949	0.374637	0.499274
688	JHI-Hv50k-2016-167911	3	52.03	182126489	0.37091	0.491886
689	JHI-Hv50k-2016-183207	3	52.46	490244247	0.374697	0.499394
690	JHI-Hv50k-2016-183072	3	52.76	489394052	0.374997	0.499995
691	JHI-Hv50k-2016-181314	3	53.01	454709874	0.192963	0.216372
692	JHI-Hv50k-2016-182952	3	53.26	485950532	0.374877	0.499755
693	JHI-Hv50k-2016-183480	3	53.9	491428837	0.374354	0.49871
694	JHI-Hv50k-2016-184162	3	54.45	497617163	0.374577	0.499154
695	BOPA1_2338-1572	3	55.1	499361359	0.362796	0.476161
696	JHI-Hv50k-2016-185325	3	55.24	507364547	0.353759	0.459184
697	JHI-Hv50k-2016-185121	3	55.35	504706811	0.356469	0.464218
698	JHI-Hv50k-2016-184646	3	55.52	500561015	0.373258	0.496528
699	JHI-Hv50k-2016-260184	3	56.55	595963832	0.350702	0.45356
700	JHI-Hv50k-2016-185268	3	56.91	507024435	0.361684	0.474043
701	JHI-Hv50k-2016-185241	3	57.08	506941673	0.374997	0.499995
702	JHI-Hv50k-2016-185812	3	57.37	511131157	0.37484	0.49968
703	JHI-Hv50k-2016-185889	3	57.4	511670303	0.362796	0.476161
704	JHI-Hv50k-2016-185880	3	57.44	511548038	0.374797	0.499594
705	JHI-Hv50k-2016-185948	3	57.54	512037578	0.249099	0.29162
706	SCRI_RS_157479	3	57.65	514758383	0.366733	0.483732
707	SCRI_RS_137934	3	58.57	517968310	0.37496	0.499919
708	JHI-Hv50k-2016-186535	3	58.99	518261663	0.374937	0.499875
709	JHI-Hv50k-2016-186582	3	59.14	519010867	0.370268	0.490623
710	JHI-Hv50k-2016-186729	3	59.28	520312788	0.369408	0.488939
711	JHI-Hv50k-2016-187003	3	59.53	524816549	0.320363	0.400604
712	SCRI_RS_158555	3	60.89	532393236	0.371505	0.493058
713	JHI-Hv50k-2016-187443	3	61.71	529008881	0.371163	0.492384
714	SCRI_RS_161744	3	61.76	530420176	0.37475	0.499499
715	BOPA2_12_30754	3	62.25	535790327	0.374188	0.498378
716	JHI-Hv50k-2016-189557	3	62.39	542299569	0.374997	0.499995
717	JHI-Hv50k-2016-189868	3	62.61	543738881	0.323594	0.40602
718	SCRI_RS_237939	3	62.68	543465095	0.37435	0.498702
719	JHI-Hv50k-2016-189832	3	62.96	543657843	0.374095	0.498192
720	JHI-Hv50k-2016-191925	3	62.97	557952236	0.283091	0.341352
721	SCRI_RS_175710	3	63.54	544018709	0.366133	0.48257
722	SCRI_RS_164675	3	64.31	550216180	0.373302	0.496615
723	JHI-Hv50k-2016-190829	3	64.48	552639299	0.251055	0.294386
724	JHI-Hv50k-2016-191204	3	64.66	554369441	0.353408	0.458535
725	JHI-Hv50k-2016-190757	3	65.89	552001956	0.365765	0.481859
726	SCRI_RS_189039	3	67.63	558790971	0.374748	0.499496
727	JHI-Hv50k-2016-192110	3	67.71	558857770	0.372582	0.495188
728	JHI-Hv50k-2016-192171	3	67.78	559146951	0.369646	0.489405
729	JHI-Hv50k-2016-191725	3	68.13	556704244	0.351227	0.454523
730	JHI-Hv50k-2016-193742	3	68.22	569482311	0.374977	0.499955
731	JHI-Hv50k-2016-192817	3	68.24	565658616	0.373554	0.497116
732	JHI-Hv50k-2016-192822	3	68.27	565672037	0.373554	0.497116
733	JHI-Hv50k-2016-193869	3	68.6	570093902	0.374095	0.498192
734	JHI-Hv50k-2016-194120	3	68.98	570911732	0.374796	0.499592
735	BOPA2_12_30278	3	69.74	571162239	0.374977	0.499955
736	JHI-Hv50k-2016-193604	3	69.9	568972443	0.176033	0.195057
737	JHI-Hv50k-2016-193845	3	70.04	570005617	0.374697	0.499394
738	JHI-Hv50k-2016-193593	3	70.18	568916121	0.374797	0.499594
739	JHI-Hv50k-2016-194216	3	70.51	571151572	0.370545	0.491167
740	JHI-Hv50k-2016-194736	3	70.9	574097657	0.374358	0.498718
741	JHI-Hv50k-2016-194156	3	70.98	571065799	0.368139	0.486461
742	JHI-Hv50k-2016-194756	3	71.29	574430642	0.369879	0.48986
743	JHI-Hv50k-2016-194354	3	71.46	571322370	0.374436	0.498873
744	JHI-Hv50k-2016-194733	3	73.02	573807015	0.374358	0.498718
745	JHI-Hv50k-2016-194971	3	74.79	581131165	0.339459	0.433359
746	JHI-Hv50k-2016-194989	3	75	581274661	0.338131	0.43102
747	JHI-Hv50k-2016-195383	3	75.21	583165753	0.374188	0.498378
748	BOPA2_12_30663	3	75.71	585223663	0.365191	0.480752
749	JHI-Hv50k-2016-195755	3	75.92	585086407	0.373997	0.497997
750	JHI-Hv50k-2016-195563	3	75.99	584357587	0.374909	0.499819
751	SCRI_RS_116760	3	76.84	586993972	0.374877	0.499753
752	JHI-Hv50k-2016-196962	3	77.69	590364192	0.373785	0.497577
753	JHI-Hv50k-2016-196486	3	79.43	587482254	0.279525	0.335959
754	SCRI_RS_199887	3	81.97	592564317	0.374635	0.49927
755	JHI-Hv50k-2016-197493	3	83.63	594194111	0.351384	0.45481
756	JHI-Hv50k-2016-197914	3	83.85	595665155	0.372089	0.494212
757	JHI-Hv50k-2016-198040	3	83.92	596518672	0.375	0.5
758	JHI-Hv50k-2016-198292	3	83.99	597307108	0.354382	0.460338
759	SCRI_RS_185339	3	84.42	597773435	0.369408	0.488939
760	BOPA2_12_30250	3	84.63	597724095	0.135094	0.14571
761	JHI-Hv50k-2016-197824	3	84.7	595504434	0.371734	0.493511
762	JHI-Hv50k-2016-198512	3	86.05	598853499	0.348156	0.448921
763	JHI-Hv50k-2016-198498	3	86.19	598840820	0.345679	0.444444
764	JHI-Hv50k-2016-198582	3	86.33	599466531	0.374797	0.499594
765	JHI-Hv50k-2016-198550	3	86.51	599163530	0.368877	0.487901
766	JHI-Hv50k-2016-199122	3	86.95	602735994	0.296438	0.361937
767	JHI-Hv50k-2016-198976	3	87.39	601476688	0.370328	0.490742
768	JHI-Hv50k-2016-199460	3	87.68	604508602	0.34225	0.438306
769	JHI-Hv50k-2016-199246	3	87.82	603246403	0.294352	0.358676
770	JHI-Hv50k-2016-199520	3	87.96	604675429	0.374095	0.498192
771	SCRI_RS_174067	3	88.24	605220894	0.37399	0.497984
772	JHI-Hv50k-2016-201011	3	88.68	612633048	0.101664	0.107435
773	JHI-Hv50k-2016-199943	3	88.81	606519742	0.374997	0.499995
774	JHI-Hv50k-2016-200069	3	89.45	607582446	0.374977	0.499955
775	JHI-Hv50k-2016-200174	3	90.01	608249881	0.351384	0.45481
776	JHI-Hv50k-2016-201018	3	90.08	612670172	0.351227	0.454523
777	JHI-Hv50k-2016-200188	3	90.16	608254860	0.374997	0.499995
778	JHI-Hv50k-2016-200779	3	90.23	611185001	0.37207	0.494175
779	BOPA2_12_10344	3	90.58	611561552	0.207478	0.235119
780	JHI-Hv50k-2016-201048	3	90.86	613897881	0.366436	0.483156
781	JHI-Hv50k-2016-200982	3	91.02	612491045	0.345874	0.444796
782	BOPA2_12_11255	3	91.04	612888241	0.347028	0.446879
783	JHI-Hv50k-2016-201287	3	91.22	614794116	0.372582	0.495188
784	JHI-Hv50k-2016-201013	3	92.03	612650870	0.351384	0.45481
785	JHI-Hv50k-2016-201319	3	92.41	615066666	0.366626	0.483524
786	JHI-Hv50k-2016-201400	3	93.37	615448162	0.369408	0.488939
787	JHI-Hv50k-2016-201308	3	93.81	615047790	0.373302	0.496615
788	JHI-Hv50k-2016-201300	3	94.28	614883376	0.368877	0.487901
789	JHI-Hv50k-2016-201745	3	96.46	617387280	0.330005	0.416913
790	JHI-Hv50k-2016-201886	3	97.17	619314552	0.144073	0.156285
791	JHI-Hv50k-2016-202499	3	97.46	621794235	0.375	0.5
792	SCRI_RS_149566	3	97.8	620058295	0.374877	0.499755
793	BOPA1_5253-1318	3	98.02	619931777	0.291073	0.353584
794	JHI-Hv50k-2016-202332	3	98.51	621299490	0.365511	0.481368
795	BOPA1_ConsensusGBS0510-2	3	98.58	621816542	0.361213	0.473147
796	JHI-Hv50k-2016-202813	3	98.65	622531894	0.372886	0.495789
797	JHI-Hv50k-2016-202619	3	98.69	621899993	0.374639	0.499279
798	JHI-Hv50k-2016-203182	3	99.24	623761873	0.369646	0.489405
799	JHI-Hv50k-2016-202728	3	100.13	621986597	0.374509	0.499019
800	SCRI_RS_155	3	100.28	622659975	0.263017	0.311549
801	JHI-Hv50k-2016-202881	3	100.42	622786454	0.374877	0.499755
802	JHI-Hv50k-2016-203343	3	100.58	624130553	0.374436	0.498873
803	JHI-Hv50k-2016-203453	3	101.03	624910313	0.37484	0.49968
804	SCRI_RS_166189	3	101.48	625106933	0.369299	0.488726
805	JHI-Hv50k-2016-203769	3	101.93	626143496	0.370268	0.490623
806	JHI-Hv50k-2016-203479	3	103.12	624933627	0.373535	0.497079
807	JHI-Hv50k-2016-204255	3	104.32	627790631	0.37484	0.49968
808	JHI-Hv50k-2016-204079	3	104.39	627150170	0.37491	0.49982
809	JHI-Hv50k-2016-204312	3	104.46	627876452	0.37496	0.49992
810	JHI-Hv50k-2016-204497	3	105.95	630038519	0.37484	0.49968
811	JHI-Hv50k-2016-204445	3	106.09	628933642	0.368139	0.486461
812	BOPA1_76-1059	3	107.25	630722599	0.37475	0.499499
813	SCRI_RS_170370	3	108.07	16105399	0.370199	0.490488
814	JHI-Hv50k-2016-204534	3	108.15	630472306	0.37491	0.49982
815	JHI-Hv50k-2016-204890	3	108.43	631486962	0.37499	0.49998
816	JHI-Hv50k-2016-205000	3	108.57	632318274	0.373672	0.497351
817	JHI-Hv50k-2016-205324	3	108.71	633495278	0.329109	0.415378
818	JHI-Hv50k-2016-205562	3	108.85	634801729	0.374839	0.499678
819	JHI-Hv50k-2016-204563	3	109.03	630557637	0.373302	0.496615
820	JHI-Hv50k-2016-205550	3	109.21	634625107	0.374877	0.499753
821	JHI-Hv50k-2016-206490	3	109.84	640183406	0.336349	0.427896
822	JHI-Hv50k-2016-206585	3	112.29	640481946	0.210976	0.239705
823	JHI-Hv50k-2016-205976	3	115.74	637930072	0.374358	0.498718
824	JHI-Hv50k-2016-205772	3	116.18	637659177	0.359304	0.469536
825	JHI-Hv50k-2016-206600	3	116.36	641852514	0.372089	0.494212
826	JHI-Hv50k-2016-206526	3	116.62	640203928	0.340346	0.434926
827	JHI-Hv50k-2016-206705	3	116.68	641975945	0.278316	0.334141
828	JHI-Hv50k-2016-207107	3	117	644701025	0.373554	0.497116
829	JHI-Hv50k-2016-206962	3	117.5	643884344	0.374188	0.498378
830	JHI-Hv50k-2016-207248	3	117.63	644958966	0.374997	0.499995
831	JHI-Hv50k-2016-207326	3	117.64	645471624	0.373029	0.496074
832	JHI-Hv50k-2016-207331	3	117.92	645472633	0.368139	0.486461
833	JHI-Hv50k-2016-207005	3	117.94	644296955	0.374271	0.498544
834	JHI-Hv50k-2016-207339	3	118.2	645477145	0.373029	0.496074
835	JHI-Hv50k-2016-207601	3	118.37	646968927	0.257229	0.303192
836	JHI-Hv50k-2016-207635	3	118.91	647436977	0.360121	0.471078
837	JHI-Hv50k-2016-207766	3	119.25	648311993	0.237156	0.274956
838	JHI-Hv50k-2016-208049	3	120.13	649225193	0.339042	0.432623
839	JHI-Hv50k-2016-208080	3	120.79	649805117	0.349799	0.451911
840	JHI-Hv50k-2016-208184	3	120.89	650219706	0.332093	0.420506
841	JHI-Hv50k-2016-208689	3	122.03	651951286	0.374977	0.499955
842	BOPA2_12_31251	3	122.59	654499243	0.37496	0.49992
843	JHI-Hv50k-2016-208800	3	122.63	652430367	0.371734	0.493511
844	JHI-Hv50k-2016-209031	3	122.75	652761624	0.373997	0.497997
845	JHI-Hv50k-2016-208564	3	122.91	651476559	0.121486	0.129927
846	JHI-Hv50k-2016-209194	3	123.23	653295101	0.374977	0.499955
847	JHI-Hv50k-2016-209393	3	123.62	654230757	0.254798	0.299712
848	SCRI_RS_162863	3	124.49	654789078	0.37475	0.499499
849	BOPA2_12_30482	3	125.81	660284941	0.372551	0.495127
850	JHI-Hv50k-2016-212094	3	126.24	660651124	0.116381	0.124079
851	JHI-Hv50k-2016-210726	3	126.7	657474230	0.374432	0.498866
852	JHI-Hv50k-2016-210840	3	127.27	657529032	0.375	0.5
853	JHI-Hv50k-2016-210996	3	127.3	658126068	0.246182	0.287514
854	JHI-Hv50k-2016-211116	3	127.97	658334521	0.371734	0.493511
855	JHI-Hv50k-2016-212262	3	127.98	660846601	0.372089	0.494212
856	JHI-Hv50k-2016-211281	3	128.04	658470160	0.37342	0.496851
857	SCRI_RS_194148	3	128.05	658352656	0.369606	0.489327
858	JHI-Hv50k-2016-211296	3	128.61	658474734	0.374639	0.499279
859	SCRI_RS_231382	3	128.75	659901013	0.374509	0.499019
860	JHI-Hv50k-2016-212487	3	128.84	661180283	0.352911	0.457619
861	JHI-Hv50k-2016-212785	3	131.66	661655691	0.374358	0.498718
862	SCRI_RS_183550	3	131.73	661701428	0.37496	0.49992
863	SCRI_RS_169325	3	131.8	41587407	0.37496	0.49992
864	SCRI_RS_167698	3	132.01	663483189	0.37499	0.49998
865	JHI-Hv50k-2016-73694	3	132.49	29669609	0.355202	0.461859
866	JHI-Hv50k-2016-213788	3	132.93	663664844	0.177582	0.196984
867	JHI-Hv50k-2016-214463	3	133	664997409	0.374937	0.499874
868	JHI-Hv50k-2016-215277	3	135.48	667607429	0.37496	0.49992
869	JHI-Hv50k-2016-215126	3	135.55	666352488	0.161298	0.176955
870	JHI-Hv50k-2016-215413	3	135.62	667946895	0.374997	0.499995
871	JHI-Hv50k-2016-216139	3	137.25	670245919	0.373997	0.497997
872	JHI-Hv50k-2016-215624	3	137.39	668951958	0.332093	0.420506
873	JHI-Hv50k-2016-216563	3	137.61	670565490	0.363155	0.476847
874	SCRI_RS_205957	3	137.75	670387744	0.251971	0.295686
875	JHI-Hv50k-2016-216973	3	137.85	672933436	0.359715	0.470312
876	JHI-Hv50k-2016-216707	3	137.89	671264854	0.369165	0.488463
877	JHI-Hv50k-2016-216809	3	138.17	672054541	0.374959	0.499919
878	JHI-Hv50k-2016-217612	3	138.27	673991139	0.37496	0.499919
879	JHI-Hv50k-2016-217538	3	138.69	673933418	0.307615	0.379702
880	JHI-Hv50k-2016-216826	3	138.74	672398547	0.37342	0.496851
881	JHI-Hv50k-2016-217242	3	139.02	673097825	0.374797	0.499594
882	JHI-Hv50k-2016-218417	3	139.12	675867994	0.368917	0.487978
883	JHI-Hv50k-2016-217167	3	139.16	673063071	0.374695	0.49939
884	JHI-Hv50k-2016-219014	3	142.21	677527746	0.374997	0.499995
885	JHI-Hv50k-2016-218849	3	142.63	676737075	0.374509	0.499019
886	JHI-Hv50k-2016-218450	3	142.78	675885860	0.354727	0.460978
887	JHI-Hv50k-2016-219329	3	142.92	678603230	0.363509	0.477523
888	JHI-Hv50k-2016-219373	3	143.13	679073293	0.374869	0.499738
889	BOPA2_12_30271	3	143.62	681734603	0.24072	0.279889
890	JHI-Hv50k-2016-220283	3	143.91	681728755	0.364535	0.47949
891	JHI-Hv50k-2016-220128	3	143.98	681604817	0.37475	0.499499
892	JHI-Hv50k-2016-220372	3	144.12	681872487	0.374679	0.499358
893	JHI-Hv50k-2016-220519	3	144.9	682161520	0.37484	0.49968
894	BOPA1_ABC38781-pHv2346-01	3	145.54	683722415	0.373785	0.497577
895	JHI-Hv50k-2016-221521	3	145.96	684968721	0.317695	0.39617
896	JHI-Hv50k-2016-220997	3	146.26	683352145	0.157082	0.171847
897	JHI-Hv50k-2016-221822	3	147.17	686480985	0.37499	0.49998
898	JHI-Hv50k-2016-222407	3	148.16	687530226	0.362717	0.476009
899	JHI-Hv50k-2016-222468	3	148.37	687543025	0.35017	0.452588
900	BOPA1_ConsensusGBS0632-3	3	148.51	688380435	0.365191	0.480752
901	JHI-Hv50k-2016-222523	3	148.58	687549567	0.373785	0.497577
902	JHI-Hv50k-2016-223777	3	148.73	689772565	0.350702	0.45356
903	JHI-Hv50k-2016-222222	3	149.16	687384367	0.374639	0.499279
904	JHI-Hv50k-2016-223498	3	149.58	689644176	0.362837	0.47624
905	JHI-Hv50k-2016-223022	3	149.99	688500044	0.363155	0.476847
906	JHI-Hv50k-2016-223619	3	150.81	689738502	0.371359	0.49277
907	JHI-Hv50k-2016-224062	3	151.63	690951681	0.353898	0.459442
908	JHI-Hv50k-2016-224353	3	152.45	693374267	0.362431	0.475465
909	JHI-Hv50k-2016-225101	3	153.27	695810491	0.371895	0.493827
910	JHI-Hv50k-2016-225520	3	154.08	696233496	0.374358	0.498718
911	JHI-Hv50k-2016-225480	3	154.49	696220141	0.257581	0.303697
912	JHI-Hv50k-2016-223712	3	154.85	689769088	0.355202	0.461859
913	JHI-Hv50k-2016-224945	3	154.89	695248637	0.37499	0.49998
914	JHI-Hv50k-2016-225924	4	0.64	381858	0.374927	0.499854
915	SCRI_RS_13428	4	0.71	743336	0.374796	0.499592
916	JHI-Hv50k-2016-227034	4	0.78	2023008	0.37475	0.499499
917	JHI-Hv50k-2016-226951	4	0.94	1808169	0.125865	0.134974
918	JHI-Hv50k-2016-228070	4	1.02	4892549	0.358781	0.468551
919	JHI-Hv50k-2016-227007	4	1.06	1927457	0.37091	0.491886
920	JHI-Hv50k-2016-228077	4	1.96	4926563	0.357599	0.466332
921	SCRI_RS_154517	4	2.9	2259618	0.368139	0.486461
922	JHI-Hv50k-2016-227406	4	3.47	2810996	0.365825	0.481974
923	JHI-Hv50k-2016-227727	4	3.54	3837652	0.356134	0.463593
924	JHI-Hv50k-2016-227648	4	4.19	3730302	0.37484	0.49968
925	JHI-Hv50k-2016-228010	4	6.96	4782725	0.354727	0.460978
926	JHI-Hv50k-2016-228177	4	9.63	5324211	0.198975	0.224082
927	JHI-Hv50k-2016-228484	4	11.38	7405567	0.367025	0.484297
928	JHI-Hv50k-2016-228383	4	12.27	6481931	0.374937	0.499874
929	JHI-Hv50k-2016-230077	4	14.43	10687816	0.368758	0.487667
930	JHI-Hv50k-2016-229333	4	14.94	9728493	0.37484	0.49968
931	SCRI_RS_105960	4	14.98	10036554	0.362431	0.475465
932	JHI-Hv50k-2016-228570	4	16.1	7719283	0.360121	0.471078
933	JHI-Hv50k-2016-230302	4	17.85	11543783	0.371914	0.493866
934	JHI-Hv50k-2016-230361	4	18.06	12076350	0.314627	0.391111
935	JHI-Hv50k-2016-230444	4	18.27	12286325	0.373302	0.496615
936	JHI-Hv50k-2016-230386	4	18.38	12261989	0.372089	0.494212
937	SCRI_RS_150585	4	18.48	12449243	0.375	0.5
938	JHI-Hv50k-2016-228593	4	19.66	7738485	0.373785	0.497577
939	JHI-Hv50k-2016-230631	4	20.89	14394965	0.35671	0.464669
940	JHI-Hv50k-2016-230685	4	21.03	14605473	0.322775	0.404643
941	JHI-Hv50k-2016-230622	4	21.18	14283002	0.370962	0.491988
942	JHI-Hv50k-2016-228673	4	21.22	8211769	0.372423	0.494873
943	SCRI_RS_98443	4	22.24	15278660	0.334959	0.425473
944	JHI-Hv50k-2016-228988	4	22.79	8858157	0.37499	0.49998
945	JHI-Hv50k-2016-230880	4	24.07	16124056	0.374574	0.499148
946	JHI-Hv50k-2016-229091	4	24.38	9448303	0.374877	0.499753
947	JHI-Hv50k-2016-231038	4	25.85	17600060	0.374877	0.499755
948	JHI-Hv50k-2016-231066	4	25.92	17919789	0.37499	0.49998
949	JHI-Hv50k-2016-231001	4	26.35	17377068	0.374977	0.499954
950	JHI-Hv50k-2016-231059	4	26.56	17918449	0.374977	0.499954
951	JHI-Hv50k-2016-231536	4	26.77	20063345	0.373157	0.496327
952	JHI-Hv50k-2016-231550	4	27.48	20493788	0.357599	0.466332
953	JHI-Hv50k-2016-231665	4	27.8	21433569	0.270853	0.323025
954	JHI-Hv50k-2016-229875	4	29.15	10531330	0.375	0.5
955	JHI-Hv50k-2016-230240	4	29.94	11347326	0.370516	0.491111
956	JHI-Hv50k-2016-231825	4	30.03	21790655	0.37484	0.49968
957	JHI-Hv50k-2016-230512	4	33.81	13709787	0.173598	0.192037
958	JHI-Hv50k-2016-230874	4	34.56	16122841	0.374509	0.499019
959	JHI-Hv50k-2016-230888	4	35.31	16125764	0.374574	0.499148
960	JHI-Hv50k-2016-232253	4	35.91	25919461	0.37499	0.49998
961	JHI-Hv50k-2016-230920	4	36.05	16283215	0.363856	0.478189
962	JHI-Hv50k-2016-232713	4	36.35	27331138	0.361976	0.474598
963	SCRI_RS_179489	4	36.86	26673026	0.230903	0.266384
964	JHI-Hv50k-2016-229793	4	37.5	10317592	0.358034	0.467148
965	JHI-Hv50k-2016-232602	4	37.82	26675745	0.364535	0.47949
966	JHI-Hv50k-2016-232682	4	39.8	27325123	0.374509	0.499019
967	SCRI_RS_145412	4	39.91	27784777	0.363856	0.478189
968	SCRI_RS_6956	4	40.01	27590029	0.374182	0.498367
969	JHI-Hv50k-2016-232208	4	41.58	24369430	0.303189	0.372608
970	JHI-Hv50k-2016-232815	4	41.96	30205621	0.148469	0.161513
971	SCRI_RS_183399	4	42.07	30937091	0.365191	0.480752
972	JHI-Hv50k-2016-231888	4	42.21	22324263	0.372872	0.495762
973	JHI-Hv50k-2016-232915	4	43.34	30942713	0.365191	0.480752
974	JHI-Hv50k-2016-233000	4	43.48	31839887	0.374639	0.499279
975	SCRI_RS_116338	4	43.63	31944103	0.374509	0.499019
976	JHI-Hv50k-2016-232586	4	44	26501716	0.35704	0.465286
977	JHI-Hv50k-2016-232676	4	44.58	27210425	0.342655	0.439027
978	JHI-Hv50k-2016-234069	4	44.9	36215433	0.361684	0.474043
979	JHI-Hv50k-2016-234381	4	44.99	37601374	0.325666	0.409519
980	JHI-Hv50k-2016-234238	4	45.68	36700167	0.301662	0.370177
981	SCRI_RS_144322	4	48.65	43502233	0.35671	0.464669
982	JHI-Hv50k-2016-234165	4	48.79	36656091	0.312322	0.387338
983	JHI-Hv50k-2016-234169	4	49.15	36658773	0.373554	0.497116
984	SCRI_RS_207030	4	50.89	44247146	0.344092	0.441596
985	JHI-Hv50k-2016-243111	4	50.9	439641962	0.227089	0.261202
986	JHI-Hv50k-2016-235646	4	50.99	48038665	0.374937	0.499874
987	JHI-Hv50k-2016-235425	4	51.03	44461589	0.369165	0.488463
988	SCRI_RS_186944	4	51.06	223960036	0.144452	0.156735
989	JHI-Hv50k-2016-237665	4	51.13	67414807	0.373554	0.497116
990	JHI-Hv50k-2016-240228	4	51.21	123794162	0.336349	0.427896
991	JHI-Hv50k-2016-236924	4	51.33	59724376	0.371895	0.493827
992	JHI-Hv50k-2016-242387	4	51.4	420100453	0.34203	0.437914
993	JHI-Hv50k-2016-242482	4	51.59	420787471	0.352259	0.456417
994	BOPA1_ABC05369-1-3-231	4	51.91	459813388	0.374432	0.498866
995	JHI-Hv50k-2016-235577	4	52.32	47135238	0.37496	0.49992
996	JHI-Hv50k-2016-245550	4	52.59	470939288	0.327571	0.412754
997	JHI-Hv50k-2016-248770	4	53.05	503110502	0.351899	0.455756
998	JHI-Hv50k-2016-236713	4	53.96	57488473	0.275869	0.330476
999	JHI-Hv50k-2016-245611	4	54.04	471100336	0.189201	0.211585
1000	JHI-Hv50k-2016-246473	4	54.24	478369041	0.372089	0.494212
1001	BOPA1_ABC06247-1-1-122	4	54.32	500201395	0.37491	0.49982
1002	JHI-Hv50k-2016-247919	4	54.6	491740664	0.349799	0.451911
1003	JHI-Hv50k-2016-249706	4	55.28	514967815	0.373554	0.497116
1004	JHI-Hv50k-2016-241108	4	55.64	282085131	0.278316	0.334141
1005	JHI-Hv50k-2016-249692	4	55.74	514445200	0.373554	0.497116
1006	JHI-Hv50k-2016-249545	4	55.75	510640529	0.374639	0.499279
1007	JHI-Hv50k-2016-249684	4	55.87	514073243	0.373554	0.497116
1008	JHI-Hv50k-2016-249669	4	56.05	512653165	0.373554	0.497116
1009	JHI-Hv50k-2016-252011	4	56.23	535503939	0.374937	0.499874
1010	SCRI_RS_189180	4	56.41	535568894	0.374748	0.499496
1011	JHI-Hv50k-2016-251758	4	56.59	534321524	0.373785	0.497577
1012	JHI-Hv50k-2016-249665	4	56.67	512646955	0.373554	0.497116
1013	SCRI_RS_13921	4	56.94	535815764	0.371734	0.493511
1014	SCRI_RS_109600	4	58.36	537011278	0.374695	0.49939
1015	JHI-Hv50k-2016-254087	4	58.7	554097384	0.203929	0.230492
1016	SCRI_RS_207394	4	59.49	537436328	0.374695	0.49939
1017	JHI-Hv50k-2016-254192	4	59.65	555179732	0.280723	0.337766
1018	JHI-Hv50k-2016-252385	4	59.7	539982557	0.0943467	0.0992744
1019	JHI-Hv50k-2016-253828	4	59.77	552174543	0.373997	0.497997
1020	JHI-Hv50k-2016-253498	4	59.99	547715886	0.374509	0.499019
1021	JHI-Hv50k-2016-255317	4	60.77	565364643	0.372831	0.49568
1022	JHI-Hv50k-2016-249711	4	61.3	514975887	0.37342	0.496851
1023	JHI-Hv50k-2016-255236	4	61.69	565257005	0.368139	0.486461
1024	JHI-Hv50k-2016-253987	4	61.94	553947387	0.352259	0.456417
1025	JHI-Hv50k-2016-255657	4	62.54	566802163	0.37499	0.49998
1026	JHI-Hv50k-2016-255446	4	62.89	565563360	0.357923	0.466939
1027	JHI-Hv50k-2016-255256	4	63.14	565277166	0.358023	0.467127
1028	JHI-Hv50k-2016-255752	4	63.24	567080958	0.37484	0.49968
1029	JHI-Hv50k-2016-256049	4	63.39	568317935	0.374997	0.499995
1030	JHI-Hv50k-2016-255620	4	63.53	566549381	0.37475	0.499499
1031	JHI-Hv50k-2016-256327	4	63.67	570786203	0.309063	0.382041
1032	SCRI_RS_179444	4	65.53	572908722	0.355202	0.461859
1033	SCRI_RS_143825	4	66.72	572803177	0.373785	0.497577
1034	BOPA1_ConsensusGBS0589-1	4	67	574543534	0.332093	0.420506
1035	JHI-Hv50k-2016-257045	4	67.07	574557909	0.302679	0.371795
1036	JHI-Hv50k-2016-257103	4	67.56	574794950	0.374358	0.498718
1037	JHI-Hv50k-2016-258154	4	69.21	580484122	0.370936	0.491938
1038	JHI-Hv50k-2016-257801	4	69.33	578979202	0.371138	0.492336
1039	SCRI_RS_238610	4	69.85	580621434	0.367545	0.485306
1040	SCRI_RS_119486	4	70.33	580160646	0.364866	0.480126
1041	JHI-Hv50k-2016-258243	4	71.16	580597580	0.350334	0.452887
1042	JHI-Hv50k-2016-258355	4	71.82	581070111	0.362796	0.476161
1043	JHI-Hv50k-2016-258183	4	72.5	580557518	0.258616	0.305185
1044	JHI-Hv50k-2016-258560	4	73.18	583407708	0.348738	0.449979
1045	JHI-Hv50k-2016-258889	4	73.58	586058068	0.374877	0.499755
1046	JHI-Hv50k-2016-258949	4	73.65	586246134	0.373893	0.497792
1047	JHI-Hv50k-2016-258571	4	73.87	583697950	0.347596	0.447905
1048	BOPA1_2196-195	4	74.57	585200008	0.366733	0.483732
1049	JHI-Hv50k-2016-259236	4	74.96	590052546	0.367593	0.485399
1050	JHI-Hv50k-2016-259337	4	76.27	590411420	0.374358	0.498718
1051	JHI-Hv50k-2016-259749	4	78.54	594277857	0.336349	0.427896
1052	JHI-Hv50k-2016-259627	4	78.61	593632226	0.350862	0.453854
1053	JHI-Hv50k-2016-259791	4	78.68	594569193	0.373302	0.496615
1054	BOPA1_ConsensusGBS0461-3	4	78.75	590917631	0.37491	0.49982
1055	JHI-Hv50k-2016-260254	4	78.82	596300829	0.368139	0.486461
1056	JHI-Hv50k-2016-259764	4	79.46	594402118	0.373997	0.497997
1057	BOPA2_12_31246	4	80.45	599001572	0.374997	0.499995
1058	JHI-Hv50k-2016-261119	4	80.81	599520335	0.363155	0.476847
1059	JHI-Hv50k-2016-260529	4	80.95	598648894	0.374639	0.499279
1060	JHI-Hv50k-2016-260998	4	81.02	599329929	0.374695	0.49939
1061	JHI-Hv50k-2016-260946	4	81.09	599239810	0.374635	0.49927
1062	JHI-Hv50k-2016-262645	4	81.57	605495951	0.344092	0.441596
1063	SCRI_RS_176669	4	81.59	598310777	0.369646	0.489405
1064	JHI-Hv50k-2016-262431	4	82.3	604939022	0.373997	0.497997
1065	JHI-Hv50k-2016-261416	4	82.79	600635541	0.371359	0.49277
1066	JHI-Hv50k-2016-261697	4	83.01	601705393	0.372052	0.494138
1067	JHI-Hv50k-2016-261820	4	83.72	602692661	0.310465	0.384313
1068	JHI-Hv50k-2016-261435	4	85.13	600666352	0.37484	0.49968
1069	BOPA1_4564-604	4	85.34	601568256	0.350862	0.453854
1070	BOPA1_5245-304	4	85.55	604403847	0.371734	0.493511
1071	JHI-Hv50k-2016-262714	4	87.25	607602445	0.340346	0.434926
1072	JHI-Hv50k-2016-262784	4	88.64	607801267	0.360121	0.471078
1073	SCRI_RS_165236	4	91.15	608061733	0.374748	0.499496
1074	JHI-Hv50k-2016-263019	4	91.29	608377213	0.353121	0.458005
1075	JHI-Hv50k-2016-263263	4	91.39	611858089	0.360822	0.472406
1076	JHI-Hv50k-2016-263557	4	91.5	613639046	0.242743	0.282704
1077	JHI-Hv50k-2016-263102	4	91.71	609225618	0.37499	0.49998
1078	JHI-Hv50k-2016-263331	4	92.06	612088378	0.34449	0.442308
1079	JHI-Hv50k-2016-263395	4	92.73	612096829	0.345088	0.443381
1080	JHI-Hv50k-2016-263525	4	92.85	613449816	0.338379	0.431456
1081	JHI-Hv50k-2016-263541	4	97.09	613524427	0.232484	0.268542
1082	JHI-Hv50k-2016-264375	4	97.45	617411992	0.374796	0.499592
1083	JHI-Hv50k-2016-263987	4	97.59	615700972	0.374577	0.499154
1084	BOPA2_12_30554	4	97.66	618415678	0.374997	0.499995
1085	JHI-Hv50k-2016-265495	4	97.85	620258316	0.373302	0.496615
1086	JHI-Hv50k-2016-265728	4	98.85	620839393	0.245218	0.286163
1087	JHI-Hv50k-2016-265290	4	99.08	619704364	0.374997	0.499995
1088	JHI-Hv50k-2016-265622	4	99.43	620634415	0.37475	0.499499
1089	JHI-Hv50k-2016-266331	4	99.72	622608905	0.351384	0.45481
1090	JHI-Hv50k-2016-263639	4	100.29	613776745	0.200327	0.225825
1091	JHI-Hv50k-2016-266763	4	101.28	623207668	0.37377	0.497546
1092	SCRI_RS_156130	4	101.7	623360843	0.373785	0.497577
1093	JHI-Hv50k-2016-267154	4	102.12	623655762	0.368663	0.487482
1094	JHI-Hv50k-2016-267212	4	102.62	623746652	0.368139	0.486461
1095	JHI-Hv50k-2016-267839	4	102.69	626174686	0.364198	0.478845
1096	JHI-Hv50k-2016-267371	4	102.76	624585373	0.374997	0.499995
1097	JHI-Hv50k-2016-267776	4	103.28	626101655	0.139614	0.151017
1098	JHI-Hv50k-2016-267291	4	103.75	624563107	0.367868	0.485935
1099	JHI-Hv50k-2016-268606	4	103.87	628099286	0.362061	0.474759
1100	JHI-Hv50k-2016-268095	4	103.89	626792533	0.374271	0.498544
1101	JHI-Hv50k-2016-267907	4	103.9	626279385	0.374977	0.499955
1102	JHI-Hv50k-2016-268610	4	105.05	628312310	0.319595	0.399326
1103	JHI-Hv50k-2016-268868	4	109.64	630337488	0.374997	0.499995
1104	SCRI_RS_76975	4	110.45	630864221	0.37484	0.49968
1105	JHI-Hv50k-2016-269379	4	110.69	631728515	0.371335	0.492724
1106	JHI-Hv50k-2016-269162	4	110.76	631421217	0.337457	0.429836
1107	JHI-Hv50k-2016-269151	4	110.91	631306587	0.346454	0.445842
1108	JHI-Hv50k-2016-270289	4	111.22	633602249	0.374577	0.499154
1109	JHI-Hv50k-2016-271410	4	111.33	636320948	0.350702	0.45356
1110	JHI-Hv50k-2016-270319	4	112.98	633840820	0.37395	0.497905
1111	JHI-Hv50k-2016-271622	4	113.39	636432938	0.373554	0.497116
1112	SCRI_RS_9164	4	113.74	636574078	0.312322	0.387338
1113	JHI-Hv50k-2016-271401	4	114.07	636319750	0.189201	0.211585
1114	JHI-Hv50k-2016-271882	4	114.73	637350455	0.139985	0.151454
1115	JHI-Hv50k-2016-276495	4	114.78	645503791	0.374436	0.498873
1116	JHI-Hv50k-2016-177962	4	115.15	405259121	0.374697	0.499394
1117	JHI-Hv50k-2016-272205	4	115.23	638053641	0.374997	0.499995
1118	BOPA2_12_30476	4	115.69	638223519	0.366436	0.483156
1119	JHI-Hv50k-2016-273025	4	116.23	640534957	0.374796	0.499592
1120	JHI-Hv50k-2016-273164	4	116.76	640584449	0.355414	0.462253
1121	JHI-Hv50k-2016-276166	4	117.29	644854874	0.37499	0.49998
1122	JHI-Hv50k-2016-276997	5	0	396184	0.37499	0.49998
1123	JHI-Hv50k-2016-277307	5	0.14	1316159	0.374997	0.499995
1124	JHI-Hv50k-2016-277279	5	0.47	1131874	0.372708	0.495436
1125	JHI-Hv50k-2016-277520	5	0.8	2436578	0.289962	0.351867
1126	JHI-Hv50k-2016-277530	5	1.09	2450660	0.374937	0.499875
1127	JHI-Hv50k-2016-277557	5	1.11	2455014	0.373168	0.49635
1128	JHI-Hv50k-2016-277560	5	1.45	2459271	0.375	0.5
1129	JHI-Hv50k-2016-277585	5	1.53	2549405	0.374095	0.498192
1130	JHI-Hv50k-2016-277753	5	1.6	2883977	0.374937	0.499875
1131	JHI-Hv50k-2016-277831	5	2.22	2899818	0.374977	0.499955
1132	JHI-Hv50k-2016-277889	5	2.64	2947840	0.358034	0.467148
1133	JHI-Hv50k-2016-278063	5	3.33	3438533	0.374797	0.499594
1134	JHI-Hv50k-2016-278463	5	4.17	4178342	0.37461	0.499221
1135	JHI-Hv50k-2016-278513	5	4.72	4214153	0.227089	0.261202
1136	JHI-Hv50k-2016-278482	5	5.28	4182688	0.373554	0.497116
1137	JHI-Hv50k-2016-278862	5	8.61	5619854	0.374937	0.499875
1138	SCRI_RS_214760	5	9.31	6041150	0.367312	0.484853
1139	SCRI_RS_228061	5	10.61	4734182	0.373655	0.497317
1140	JHI-Hv50k-2016-279191	5	11.42	6358016	0.356257	0.463823
1141	JHI-Hv50k-2016-279366	5	12.01	6616822	0.37341	0.496831
1142	JHI-Hv50k-2016-279300	5	13.12	6551898	0.359205	0.46935
1143	SCRI_RS_179260	5	13.19	7471881	0.354382	0.460338
1144	JHI-Hv50k-2016-279669	5	13.23	7126069	0.356346	0.463989
1145	JHI-Hv50k-2016-278937	5	14.12	5701880	0.269319	0.320764
1146	JHI-Hv50k-2016-280523	5	14.24	8506550	0.374895	0.49979
1147	JHI-Hv50k-2016-279151	5	14.64	6319934	0.367497	0.485212
1148	JHI-Hv50k-2016-280689	5	14.79	8794237	0.207478	0.235119
1149	JHI-Hv50k-2016-281177	5	17.57	9929783	0.374937	0.499875
1150	JHI-Hv50k-2016-280954	5	17.64	9489231	0.358463	0.467954
1151	JHI-Hv50k-2016-281232	5	17.92	10174482	0.234559	0.271383
1152	JHI-Hv50k-2016-281221	5	18.19	10172804	0.275869	0.330476
1153	JHI-Hv50k-2016-281652	5	23.61	12036348	0.37496	0.49992
1154	JHI-Hv50k-2016-281621	5	25.23	11906422	0.121155	0.129547
1155	JHI-Hv50k-2016-281531	5	25.66	11766193	0.357485	0.466117
1156	JHI-Hv50k-2016-281470	5	26.36	11136356	0.317695	0.39617
1157	JHI-Hv50k-2016-282963	5	29.1	15651965	0.374977	0.499955
1158	JHI-Hv50k-2016-281449	5	29.58	11068935	0.317695	0.39617
1159	BOPA1_4684-775	5	30.42	16277132	0.374877	0.499755
1160	JHI-Hv50k-2016-283234	5	30.49	16332840	0.336349	0.427896
1161	JHI-Hv50k-2016-283856	5	30.56	18969067	0.374095	0.498192
1162	JHI-Hv50k-2016-283907	5	30.69	19048181	0.373687	0.497381
1163	SCRI_RS_205508	5	30.83	19885671	0.296438	0.361937
1164	JHI-Hv50k-2016-282235	5	30.91	12610746	0.289962	0.351867
1165	JHI-Hv50k-2016-284841	5	31.67	21971562	0.37499	0.49998
1166	JHI-Hv50k-2016-283159	5	32.02	16324036	0.370298	0.490683
1167	SCRI_RS_156295	5	32.43	23671741	0.374177	0.498357
1168	JHI-Hv50k-2016-285475	5	34.1	24601637	0.374937	0.499874
1169	JHI-Hv50k-2016-286062	5	34.17	25810171	0.374432	0.498866
1170	JHI-Hv50k-2016-286093	5	34.24	25827621	0.373785	0.497577
1171	JHI-Hv50k-2016-286770	5	35.47	29334054	0.194824	0.21875
1172	JHI-Hv50k-2016-284439	5	36.3	20346518	0.358034	0.467148
1173	JHI-Hv50k-2016-284432	5	36.81	20313179	0.367312	0.484853
1174	JHI-Hv50k-2016-286384	5	38.12	28167753	0.374796	0.499592
1175	JHI-Hv50k-2016-286574	5	38.31	28598075	0.371194	0.492445
1176	JHI-Hv50k-2016-286861	5	39.51	30206123	0.371895	0.493827
1177	JHI-Hv50k-2016-298127	5	39.76	330160337	0.37399	0.497984
1178	SCRI_RS_220645	5	40	30703080	0.332821	0.421762
1179	JHI-Hv50k-2016-288318	5	40.76	35239929	0.34203	0.437914
1180	JHI-Hv50k-2016-287507	5	41.32	32590262	0.37475	0.499499
1181	JHI-Hv50k-2016-288996	5	41.46	39816265	0.360121	0.471078
1182	SCRI_RS_114729	5	41.6	42066518	0.374697	0.499394
1183	JHI-Hv50k-2016-287476	5	41.74	32565104	0.309554	0.382835
1184	JHI-Hv50k-2016-291646	5	41.91	71123293	0.370756	0.491583
1185	JHI-Hv50k-2016-286836	5	41.98	29466528	0.359615	0.470123
1186	JHI-Hv50k-2016-290240	5	42.01	48759432	0.294352	0.358676
1187	SCRI_RS_142259	5	42.15	80422910	0.363	0.476551
1188	SCRI_RS_103840	5	42.47	49956976	0.337709	0.43028
1189	JHI-Hv50k-2016-286777	5	42.58	29337595	0.374937	0.499874
1190	SCRI_RS_68142	5	42.78	71508024	0.374937	0.499875
1191	JHI-Hv50k-2016-290996	5	42.81	63315076	0.157082	0.171847
1192	BOPA2_12_31257	5	42.85	67487717	0.370328	0.490742
1193	JHI-Hv50k-2016-291873	5	42.92	72976577	0.375	0.5
1194	BOPA2_12_31155	5	42.99	72936488	0.374997	0.499995
1195	JHI-Hv50k-2016-291811	5	43.54	71841093	0.367593	0.485399
1196	SCRI_RS_134444	5	43.61	275039338	0.356346	0.463989
1197	JHI-Hv50k-2016-292719	5	43.76	85703444	0.37342	0.496851
1198	JHI-Hv50k-2016-295879	5	43.82	199512598	0.374509	0.499019
1199	SCRI_RS_196604	5	43.92	765635785	0.319595	0.399326
1200	JHI-Hv50k-2016-298905	5	43.95	358677271	0.367025	0.484297
1201	JHI-Hv50k-2016-297283	5	43.96	291893338	0.370106	0.490306
1202	JHI-Hv50k-2016-296421	5	43.98	255515254	0.374509	0.499019
1203	JHI-Hv50k-2016-298097	5	44.03	328064201	0.364866	0.480126
1204	BOPA1_9766-787	5	44.1	94132897	0.37499	0.49998
1205	JHI-Hv50k-2016-293789	5	44.13	111218804	0.37496	0.49992
1206	JHI-Hv50k-2016-292109	5	44.17	76823452	0.375	0.5
1207	JHI-Hv50k-2016-292996	5	44.2	92028506	0.37499	0.49998
1208	BOPA1_4154-364	5	44.24	121363943	0.37484	0.49968
1209	BOPA1_4392-450	5	44.38	361450925	0.37475	0.499499
1210	SCRI_RS_229980	5	44.44	361904672	0.35089	0.453904
1211	SCRI_RS_41519	5	44.51	361700802	0.37475	0.499499
1212	BOPA1_ABC05926-1-1-51	5	44.72	363393417	0.334687	0.424999
1213	JHI-Hv50k-2016-299558	5	44.76	363428899	0.221163	0.253225
1214	JHI-Hv50k-2016-300777	5	44.79	376055619	0.368663	0.487482
1215	JHI-Hv50k-2016-299950	5	45.14	369566575	0.353265	0.458272
1216	SCRI_RS_220101	5	45.21	369161275	0.351592	0.455191
1217	SCRI_RS_134798	5	46.18	381284600	0.367822	0.485845
1218	JHI-Hv50k-2016-300387	5	46.49	372904946	0.37342	0.496851
1219	BOPA1_2283-2913	5	46.56	371035139	0.361302	0.473317
1220	SCRI_RS_150803	5	46.6	373450905	0.374639	0.499279
1221	SCRI_RS_153476	5	46.63	379090743	0.367868	0.485935
1222	JHI-Hv50k-2016-301206	5	46.74	384019230	0.303189	0.372608
1223	SCRI_RS_147429	5	47.22	392986610	0.373893	0.497792
1224	JHI-Hv50k-2016-304742	5	47.37	450656911	0.374095	0.498192
1225	JHI-Hv50k-2016-302006	5	47.5	395292890	0.159197	0.174406
1226	JHI-Hv50k-2016-304158	5	47.57	438301857	0.366018	0.482347
1227	SCRI_RS_188367	5	47.64	439205542	0.367822	0.485845
1228	JHI-Hv50k-2016-304155	5	47.71	437811306	0.374977	0.499955
1229	JHI-Hv50k-2016-297922	5	47.72	318167224	0.369879	0.48986
1230	JHI-Hv50k-2016-301458	5	47.85	389308218	0.372737	0.495494
1231	JHI-Hv50k-2016-301781	5	47.99	393286928	0.374697	0.499394
1232	JHI-Hv50k-2016-301698	5	48.12	392360672	0.372423	0.494873
1233	JHI-Hv50k-2016-301575	5	48.19	391517352	0.37499	0.49998
1234	JHI-Hv50k-2016-304153	5	48.26	437718204	0.374997	0.499995
1235	JHI-Hv50k-2016-304840	5	48.33	451059083	0.374637	0.499274
1236	JHI-Hv50k-2016-304298	5	48.7	444207012	0.368403	0.486976
1237	JHI-Hv50k-2016-304304	5	48.82	444209997	0.368403	0.486976
1238	JHI-Hv50k-2016-304643	5	49.6	447605897	0.374095	0.498192
1239	JHI-Hv50k-2016-305191	5	49.65	456778891	0.374436	0.498873
1240	JHI-Hv50k-2016-306053	5	49.83	466659936	0.374637	0.499274
1241	JHI-Hv50k-2016-305093	5	49.88	453611774	0.374436	0.498873
1242	JHI-Hv50k-2016-305837	5	50	464867975	0.373004	0.496024
1243	JHI-Hv50k-2016-306044	5	50.17	466327442	0.374697	0.499394
1244	JHI-Hv50k-2016-85992	5	50.44	109879400	0.284773	0.34391
1245	JHI-Hv50k-2016-307262	5	50.74	480814934	0.371191	0.492438
1246	BOPA1_4234-1944	5	51.46	479122439	0.372737	0.495494
1247	JHI-Hv50k-2016-306921	5	51.53	479112162	0.372737	0.495494
1248	JHI-Hv50k-2016-307484	5	51.6	481616199	0.374997	0.499995
1249	JHI-Hv50k-2016-307527	5	52.29	481899179	0.371914	0.493866
1250	JHI-Hv50k-2016-308123	5	53.1	486428980	0.37499	0.49998
1251	BOPA1_4342-528	5	53.7	482426682	0.374997	0.499995
1252	JHI-Hv50k-2016-308537	5	54.31	488355144	0.125865	0.134974
1253	JHI-Hv50k-2016-308584	5	54.93	489074973	0.251571	0.295118
1254	SCRI_RS_221999	5	55.62	461418404	0.302692	0.371815
1255	JHI-Hv50k-2016-308711	5	56.18	494237377	0.342655	0.439027
1256	JHI-Hv50k-2016-308812	5	57.46	494704550	0.324518	0.407577
1257	JHI-Hv50k-2016-308884	5	58.59	495152606	0.330005	0.416913
1258	JHI-Hv50k-2016-309046	5	59.45	497105858	0.372737	0.495494
1259	JHI-Hv50k-2016-309234	5	60.49	499580055	0.37491	0.49982
1260	JHI-Hv50k-2016-310279	5	60.83	512127467	0.258616	0.305185
1261	JHI-Hv50k-2016-310042	5	62.5	509315928	0.374635	0.49927
1262	BOPA1_171-1301	5	62.88	509768671	0.375	0.5
1263	JHI-Hv50k-2016-309991	5	62.93	506964576	0.36668	0.483628
1264	JHI-Hv50k-2016-309846	5	63.66	505608935	0.167199	0.184156
1265	JHI-Hv50k-2016-310291	5	65.16	512981619	0.360822	0.472406
1266	JHI-Hv50k-2016-310194	5	65.54	510670607	0.159197	0.174406
1267	BOPA1_4389-551	5	65.92	514827552	0.230903	0.266384
1268	SCRI_RS_166296	5	65.97	514651763	0.312322	0.387338
1269	JHI-Hv50k-2016-310426	5	66.69	516538238	0.374997	0.499995
1270	JHI-Hv50k-2016-311261	5	68.26	522146382	0.37499	0.49998
1271	JHI-Hv50k-2016-311366	5	69.31	525834365	0.374697	0.499394
1272	JHI-Hv50k-2016-311325	5	70.14	522926370	0.374639	0.499279
1273	JHI-Hv50k-2016-311590	5	70.29	526797305	0.19201	0.215156
1274	JHI-Hv50k-2016-311410	5	71.55	526114725	0.372373	0.494774
1275	JHI-Hv50k-2016-311649	5	72.41	527145476	0.371163	0.492384
1276	JHI-Hv50k-2016-311989	5	72.84	529074965	0.37496	0.49992
1277	JHI-Hv50k-2016-312001	5	73.27	529076286	0.224459	0.257651
1278	SCRI_RS_11206	5	73.33	532482529	0.319891	0.399819
1279	JHI-Hv50k-2016-312608	5	73.47	532819576	0.371527	0.493102
1280	JHI-Hv50k-2016-312681	5	74.65	533209226	0.37435	0.498702
1281	JHI-Hv50k-2016-313226	5	74.93	534728509	0.344092	0.441596
1282	JHI-Hv50k-2016-313370	5	75.24	534766726	0.2688	0.32
1283	JHI-Hv50k-2016-312060	5	75.56	529427204	0.37499	0.49998
1284	JHI-Hv50k-2016-313689	5	75.9	535624102	0.363078	0.476699
1285	JHI-Hv50k-2016-313744	5	76.04	535807054	0.374089	0.498181
1286	JHI-Hv50k-2016-313958	5	76.11	536449716	0.0966243	0.101807
1287	JHI-Hv50k-2016-312356	5	76.68	532115687	0.371734	0.493511
1288	JHI-Hv50k-2016-313964	5	77.08	536497853	0.289962	0.351867
1289	JHI-Hv50k-2016-311035	5	77.52	519302054	0.356134	0.463593
1290	JHI-Hv50k-2016-314042	5	79.75	536852325	0.344092	0.441596
1291	JHI-Hv50k-2016-314664	5	80.35	541704674	0.323239	0.405422
1292	JHI-Hv50k-2016-315706	5	80.42	545294986	0.348535	0.449609
1293	JHI-Hv50k-2016-315800	5	80.49	545995289	0.375	0.5
1294	JHI-Hv50k-2016-316000	5	80.73	546259246	0.374977	0.499955
1295	JHI-Hv50k-2016-316103	5	80.9	546805545	0.26435	0.313486
1296	JHI-Hv50k-2016-316219	5	81.32	547124504	0.331358	0.419239
1297	JHI-Hv50k-2016-315261	5	81.96	543898276	0.315937	0.393266
1298	JHI-Hv50k-2016-316829	5	82.75	549153140	0.372582	0.495188
1299	JHI-Hv50k-2016-316844	5	83.26	550826490	0.128196	0.137673
1300	JHI-Hv50k-2016-316340	5	83.47	547246027	0.323594	0.40602
1301	JHI-Hv50k-2016-479764	5	83.54	293922670	0.374275	0.498553
1302	BOPA1_5004-375	5	83.61	547429860	0.372423	0.494873
1303	JHI-Hv50k-2016-316599	5	84.37	547622387	0.372567	0.495157
1304	JHI-Hv50k-2016-316754	5	84.38	547835855	0.369165	0.488463
1305	JHI-Hv50k-2016-316655	5	84.79	547765851	0.356134	0.463593
1306	JHI-Hv50k-2016-316854	5	85.56	551800289	0.372886	0.495789
1307	JHI-Hv50k-2016-318762	5	87.36	554854359	0.374937	0.499875
1308	JHI-Hv50k-2016-318041	5	87.5	553579903	0.374697	0.499394
1309	JHI-Hv50k-2016-317460	5	87.72	552963942	0.37343	0.49687
1310	JHI-Hv50k-2016-317277	5	88.35	552721521	0.358355	0.46775
1311	JHI-Hv50k-2016-318803	5	89.5	554877971	0.330616	0.417962
1312	JHI-Hv50k-2016-318766	5	90.03	554870009	0.374839	0.499678
1313	JHI-Hv50k-2016-319057	5	90.56	556369286	0.37484	0.49968
1314	JHI-Hv50k-2016-319301	5	91.09	557080023	0.374275	0.498553
1315	BOPA1_3398-163	5	91.62	557014868	0.374095	0.498192
1316	JHI-Hv50k-2016-319592	5	93.4	557803007	0.374275	0.498553
1317	BOPA1_6913-1235	5	94.44	558935527	0.374997	0.499995
1318	JHI-Hv50k-2016-320147	5	94.72	559189895	0.373554	0.497116
1319	JHI-Hv50k-2016-319289	5	94.86	557017744	0.374095	0.498192
1320	JHI-Hv50k-2016-320510	5	95	561003135	0.37342	0.496851
1321	BOPA2_12_30854	5	95.14	559462764	0.324865	0.408163
1322	SCRI_RS_237352	5	95.49	561601170	0.372886	0.495789
1323	JHI-Hv50k-2016-320890	5	95.9	562314315	0.375	0.5
1324	JHI-Hv50k-2016-322792	5	96.44	569027694	0.37491	0.49982
1325	JHI-Hv50k-2016-321044	5	96.6	563308714	0.366733	0.483732
1326	JHI-Hv50k-2016-321150	5	97.29	563760439	0.374997	0.499995
1327	JHI-Hv50k-2016-322277	5	97.51	568049033	0.374997	0.499995
1328	JHI-Hv50k-2016-321219	5	97.71	563935384	0.370106	0.490306
1329	JHI-Hv50k-2016-323576	5	98.05	572542955	0.369165	0.488463
1330	BOPA1_ABC11221-1-3-410	5	98.12	563474890	0.314146	0.390322
1331	JHI-Hv50k-2016-321578	5	98.54	565767529	0.371713	0.493469
1332	JHI-Hv50k-2016-323081	5	98.59	570745440	0.3648	0.48
1333	SCRI_RS_172024	5	98.72	567260862	0.374877	0.499755
1334	JHI-Hv50k-2016-322514	5	98.89	568567768	0.37491	0.49982
1335	JHI-Hv50k-2016-323914	5	100.21	573575564	0.288221	0.349186
1336	JHI-Hv50k-2016-324297	5	100.75	574464367	0.373785	0.497577
1337	JHI-Hv50k-2016-323623	5	101.29	572734351	0.254941	0.299916
1338	JHI-Hv50k-2016-325133	5	102.91	576048979	0.181511	0.201891
1339	JHI-Hv50k-2016-326414	5	103.99	578910133	0.270853	0.323025
1340	JHI-Hv50k-2016-326778	5	105.07	579959492	0.371312	0.492677
1341	JHI-Hv50k-2016-326797	5	106.14	580293811	0.371734	0.493511
1342	JHI-Hv50k-2016-324180	5	106.6	574153854	0.351899	0.455756
1343	SCRI_RS_199964	5	106.68	581494694	0.374509	0.499019
1344	JHI-Hv50k-2016-327171	5	107.08	580838872	0.330616	0.417962
1345	JHI-Hv50k-2016-327486	5	107.22	581490355	0.373997	0.497997
1346	JHI-Hv50k-2016-324260	5	107.57	574436380	0.373754	0.497514
1347	JHI-Hv50k-2016-327911	5	108.29	582290651	0.37496	0.49992
1348	SCRI_RS_234720	5	109.38	577088888	0.373664	0.497334
1349	SCRI_RS_231239	5	109.65	577199445	0.37484	0.49968
1350	JHI-Hv50k-2016-326609	5	109.86	579419818	0.339042	0.432623
1351	JHI-Hv50k-2016-327388	5	110.07	581314668	0.37499	0.49998
1352	JHI-Hv50k-2016-329686	5	110.43	586319433	0.321113	0.401859
1353	SCRI_RS_162933	5	111.49	247575915	0.366436	0.483156
1354	JHI-Hv50k-2016-330331	5	112.55	587047369	0.373302	0.496615
1355	JHI-Hv50k-2016-327698	5	112.57	581801650	0.368361	0.486893
1356	JHI-Hv50k-2016-327454	5	112.64	581483457	0.370106	0.490306
1357	JHI-Hv50k-2016-327534	5	112.71	581759479	0.370962	0.491988
1358	JHI-Hv50k-2016-327943	5	112.92	582298561	0.373785	0.497577
1359	JHI-Hv50k-2016-327784	5	113.47	581966800	0.345088	0.443381
1360	SCRI_RS_236782	5	113.54	583140620	0.317296	0.39551
1361	BOPA2_12_30524	5	113.61	582884770	0.307615	0.379702
1362	JHI-Hv50k-2016-328555	5	113.89	584643229	0.351227	0.454523
1363	JHI-Hv50k-2016-327990	5	113.96	582424200	0.371895	0.493827
1364	JHI-Hv50k-2016-328308	5	114.03	583658318	0.374874	0.499748
1365	JHI-Hv50k-2016-330610	5	114.66	587436154	0.374997	0.499995
1366	SCRI_RS_239128	5	114.86	585789294	0.313239	0.388835
1367	JHI-Hv50k-2016-334895	5	116.75	597475859	0.350862	0.453854
1368	JHI-Hv50k-2016-332579	5	117.79	591355796	0.365449	0.48125
1369	JHI-Hv50k-2016-330046	5	118.75	586852455	0.260321	0.307643
1370	JHI-Hv50k-2016-334593	5	118.82	597071720	0.355798	0.462967
1371	JHI-Hv50k-2016-330549	5	118.92	587387801	0.368139	0.486461
1372	BOPA2_12_30611	5	118.96	589583192	0.374697	0.499394
1373	BOPA2_12_30590	5	119.1	589146668	0.238689	0.277074
1374	JHI-Hv50k-2016-331706	5	119.24	589371012	0.37499	0.49998
1375	SCRI_RS_167563	5	119.31	589927256	0.364198	0.478845
1376	JHI-Hv50k-2016-330621	5	119.38	587441315	0.363986	0.478437
1377	SCRI_RS_133323	5	119.72	591295900	0.261674	0.309601
1378	BOPA2_12_31286	5	119.79	590541414	0.314146	0.390322
1379	JHI-Hv50k-2016-332447	5	120.07	590967140	0.374839	0.499678
1380	SCRI_RS_188785	5	120.21	592409356	0.348156	0.448921
1381	JHI-Hv50k-2016-332594	5	120.28	591360763	0.277097	0.332314
1382	JHI-Hv50k-2016-333028	5	120.35	592511366	0.343485	0.440509
1383	JHI-Hv50k-2016-332991	5	120.59	592445330	0.358245	0.467544
1384	JHI-Hv50k-2016-333041	5	120.83	592517403	0.34225	0.438306
1385	JHI-Hv50k-2016-333100	5	121.25	593343873	0.309146	0.382176
1386	JHI-Hv50k-2016-333099	5	121.46	593189309	0.348156	0.448921
1387	JHI-Hv50k-2016-333135	5	121.74	593510014	0.345874	0.444796
1388	JHI-Hv50k-2016-337429	5	121.9	602880425	0.203929	0.230492
1389	JHI-Hv50k-2016-333445	5	122.01	593828436	0.373667	0.497342
1390	JHI-Hv50k-2016-333753	5	122.43	594550304	0.372223	0.494477
1391	JHI-Hv50k-2016-333873	5	122.57	594974149	0.374697	0.499394
1392	JHI-Hv50k-2016-334532	5	122.6	596996874	0.357599	0.466332
1393	JHI-Hv50k-2016-335244	5	125.49	597666955	0.365063	0.480506
1394	JHI-Hv50k-2016-335618	5	125.76	598089685	0.374188	0.498378
1395	JHI-Hv50k-2016-336801	5	125.83	600961484	0.34871	0.449928
1396	JHI-Hv50k-2016-336833	5	126.25	601143471	0.370106	0.490306
1397	JHI-Hv50k-2016-336681	5	126.53	600603325	0.289962	0.351867
1398	JHI-Hv50k-2016-337482	5	126.87	602896192	0.370106	0.490306
1399	JHI-Hv50k-2016-334361	5	127.08	596742367	0.355798	0.462967
1400	JHI-Hv50k-2016-337366	5	128.06	602667742	0.312322	0.387338
1401	JHI-Hv50k-2016-334337	5	128.09	596686175	0.346454	0.445842
1402	SCRI_RS_158089	5	128.12	602701584	0.369846	0.489796
1403	JHI-Hv50k-2016-336854	5	128.31	601232579	0.322775	0.404643
1404	SCRI_RS_166857	5	128.37	603103606	0.306648	0.378145
1405	JHI-Hv50k-2016-337782	5	128.54	603972672	0.339876	0.434095
1406	JHI-Hv50k-2016-337827	5	129.44	604252671	0.341807	0.437518
1407	JHI-Hv50k-2016-338020	5	129.65	605364501	0.374977	0.499955
1408	JHI-Hv50k-2016-337983	5	129.72	605313138	0.372845	0.495708
1409	JHI-Hv50k-2016-338482	5	129.79	607229087	0.345679	0.444444
1410	JHI-Hv50k-2016-338495	5	129.93	607269214	0.373302	0.496615
1411	JHI-Hv50k-2016-338592	5	130.69	607885305	0.374746	0.499493
1412	BOPA2_12_30556	5	131.18	609152097	0.375	0.5
1413	JHI-Hv50k-2016-339272	5	131.6	609412755	0.349799	0.451911
1414	SCRI_RS_185613	5	131.67	609483601	0.372845	0.495708
1415	JHI-Hv50k-2016-340076	5	131.74	610289183	0.121155	0.129547
1416	JHI-Hv50k-2016-340337	5	133.47	610623985	0.309554	0.382835
1417	JHI-Hv50k-2016-340792	5	133.61	611299948	0.37499	0.49998
1418	JHI-Hv50k-2016-340689	5	133.75	611262195	0.375	0.5
1419	JHI-Hv50k-2016-341119	5	134.31	612200353	0.364535	0.47949
1420	JHI-Hv50k-2016-341947	5	134.72	613723447	0.37496	0.49992
1421	JHI-Hv50k-2016-342080	5	135.07	614054605	0.374358	0.498718
1422	SCRI_RS_188572	5	135.21	614133141	0.374695	0.49939
1423	JHI-Hv50k-2016-342445	5	135.35	614687561	0.37491	0.49982
1424	JHI-Hv50k-2016-342512	5	135.42	614888014	0.363856	0.478189
1425	JHI-Hv50k-2016-342853	5	135.83	615398751	0.165456	0.182022
1426	JHI-Hv50k-2016-343381	5	135.95	617133783	0.363856	0.478189
1427	JHI-Hv50k-2016-342699	5	136.11	615129597	0.37491	0.49982
1428	JHI-Hv50k-2016-343718	5	136.39	617777954	0.374997	0.499995
1429	JHI-Hv50k-2016-343475	5	136.6	617222953	0.373168	0.49635
1430	JHI-Hv50k-2016-343340	5	136.61	617112726	0.344061	0.44154
1431	JHI-Hv50k-2016-343089	5	136.79	616403717	0.165456	0.182022
1432	JHI-Hv50k-2016-343523	5	136.81	617242751	0.361302	0.473317
1433	JHI-Hv50k-2016-343805	5	137.5	618180034	0.374697	0.499394
1434	BOPA2_12_30400	5	137.92	618182978	0.372259	0.494547
1435	JHI-Hv50k-2016-343930	5	138.33	618540287	0.373157	0.496327
1436	JHI-Hv50k-2016-344094	5	138.44	619597866	0.295694	0.360773
1437	SCRI_RS_204797	5	138.54	619306489	0.374797	0.499594
1438	SCRI_RS_152484	5	138.68	619657111	0.374977	0.499955
1439	JHI-Hv50k-2016-346463	5	138.96	625091471	0.373879	0.497764
1440	JHI-Hv50k-2016-346565	5	139.03	625446657	0.372737	0.495494
1441	JHI-Hv50k-2016-344252	5	139.1	619892661	0.375	0.5
1442	JHI-Hv50k-2016-345517	5	139.24	623470432	0.374748	0.499496
1443	SCRI_RS_222839	5	140.08	625351346	0.374997	0.499995
1444	JHI-Hv50k-2016-346864	5	140.89	626469377	0.148469	0.161513
1445	JHI-Hv50k-2016-347007	5	142.01	627190517	0.366436	0.483156
1446	JHI-Hv50k-2016-346913	5	142.71	626693212	0.37484	0.49968
1447	JHI-Hv50k-2016-346855	5	142.85	626403947	0.152806	0.1667
1448	JHI-Hv50k-2016-347025	5	142.99	627198855	0.369646	0.489405
1449	SCRI_RS_7678	5	143.12	626698733	0.373997	0.497997
1450	JHI-Hv50k-2016-347295	5	143.26	628395083	0.37496	0.49992
1451	JHI-Hv50k-2016-349595	5	143.29	635858057	0.358463	0.467954
1452	JHI-Hv50k-2016-347269	5	143.4	628375053	0.37491	0.49982
1453	JHI-Hv50k-2016-348172	5	143.54	630309270	0.374436	0.498873
1454	JHI-Hv50k-2016-348124	5	143.68	630213067	0.374909	0.499819
1455	JHI-Hv50k-2016-348277	5	143.82	630450966	0.374997	0.499995
1456	JHI-Hv50k-2016-348042	5	143.96	630053901	0.364866	0.480126
1457	JHI-Hv50k-2016-349146	5	144.38	633197113	0.165456	0.182022
1458	SCRI_RS_235092	5	144.51	632995904	0.374797	0.499594
1459	JHI-Hv50k-2016-182557	5	144.65	477051144	0.370756	0.491583
1460	JHI-Hv50k-2016-348421	5	144.79	630953291	0.165456	0.182022
1461	BOPA1_11470-478	5	144.93	632298125	0.349799	0.451911
1462	JHI-Hv50k-2016-349772	5	145.65	636122921	0.373302	0.496615
1463	SCRI_RS_19741	5	145.69	633762348	0.363784	0.47805
1464	JHI-Hv50k-2016-349400	5	145.76	634857634	0.31942	0.399035
1465	SCRI_RS_720	5	145.83	635984959	0.344077	0.441568
1466	JHI-Hv50k-2016-349695	5	146.05	635938660	0.355202	0.461859
1467	JHI-Hv50k-2016-349486	5	146.11	635423468	0.361302	0.473317
1468	JHI-Hv50k-2016-349686	5	146.45	635935655	0.324405	0.407387
1469	JHI-Hv50k-2016-349864	5	149.03	636678106	0.34871	0.449928
1470	JHI-Hv50k-2016-350877	5	149.79	639130555	0.372423	0.494873
1471	SCRI_RS_1458	5	149.93	639355529	0.372567	0.495157
1472	JHI-Hv50k-2016-350133	5	150.07	637280789	0.374997	0.499995
1473	BOPA1_3931-1434	5	150.17	636606455	0.28771	0.348402
1474	JHI-Hv50k-2016-351510	5	151.11	640774996	0.37484	0.49968
1475	JHI-Hv50k-2016-352526	5	151.25	642697652	0.374657	0.499314
1476	JHI-Hv50k-2016-352506	5	151.53	642627422	0.334959	0.425473
1477	JHI-Hv50k-2016-352363	5	151.67	642401048	0.37499	0.49998
1478	JHI-Hv50k-2016-353238	5	151.88	643151990	0.37499	0.49998
1479	JHI-Hv50k-2016-351853	5	151.89	641774142	0.121486	0.129927
1480	JHI-Hv50k-2016-352643	5	152.12	642922903	0.34449	0.442308
1481	JHI-Hv50k-2016-354216	5	152.36	645022969	0.37496	0.49992
1482	JHI-Hv50k-2016-354659	5	152.47	645635168	0.363856	0.478189
1483	JHI-Hv50k-2016-351810	5	153.54	641665179	0.362431	0.475465
1484	SCRI_RS_186008	5	155.12	646681828	0.37496	0.49992
1485	JHI-Hv50k-2016-354890	5	155.42	646293016	0.326003	0.410091
1486	JHI-Hv50k-2016-354996	5	155.48	646506327	0.374509	0.499019
1487	SCRI_RS_157318	5	155.56	646856689	0.374877	0.499753
1488	JHI-Hv50k-2016-354814	5	155.59	646078729	0.375	0.5
1489	JHI-Hv50k-2016-357013	5	155.62	649916618	0.347228	0.447239
1490	JHI-Hv50k-2016-355569	5	156.87	647326950	0.374977	0.499955
1491	BOPA1_3362-644	5	157.36	650754844	0.371914	0.493866
1492	JHI-Hv50k-2016-357799	5	157.85	651049650	0.374797	0.499594
1493	JHI-Hv50k-2016-358372	5	158.06	651918992	0.16171	0.177455
1494	JHI-Hv50k-2016-357900	5	158.26	651149512	0.36668	0.483628
1495	SCRI_RS_235652	5	158.89	652929697	0.209233	0.237417
1496	JHI-Hv50k-2016-358410	5	159.59	652086916	0.230903	0.266384
1497	JHI-Hv50k-2016-361293	5	160.14	657487341	0.373997	0.497997
1498	JHI-Hv50k-2016-360507	5	160.69	656633554	0.370756	0.491583
1499	BOPA1_5219-773	5	160.9	657884383	0.374509	0.499019
1500	JHI-Hv50k-2016-360716	5	161.18	656677823	0.0966243	0.101807
1501	JHI-Hv50k-2016-359473	5	161.25	654990401	0.374697	0.499394
1502	JHI-Hv50k-2016-361118	5	161.32	657257118	0.37484	0.49968
1503	JHI-Hv50k-2016-361819	5	161.39	657933309	0.37491	0.49982
1504	JHI-Hv50k-2016-361337	5	161.53	657499748	0.246182	0.287514
1505	JHI-Hv50k-2016-361124	5	161.56	657262794	0.373554	0.497116
1506	JHI-Hv50k-2016-361878	5	161.6	657969627	0.346454	0.445842
1507	JHI-Hv50k-2016-361439	5	161.81	657525479	0.283605	0.342132
1508	JHI-Hv50k-2016-361466	5	162.5	657535313	0.332821	0.421762
1509	JHI-Hv50k-2016-362138	5	163.61	658786450	0.355798	0.462967
1510	JHI-Hv50k-2016-362302	5	163.65	659419522	0.300661	0.368591
1511	JHI-Hv50k-2016-362327	5	163.68	659463365	0.370962	0.491988
1512	JHI-Hv50k-2016-362189	5	164.2	658975717	0.260321	0.307643
1513	JHI-Hv50k-2016-363108	5	165.69	661587626	0.123855	0.132653
1514	JHI-Hv50k-2016-362587	5	165.83	660823217	0.370936	0.491938
1515	JHI-Hv50k-2016-362482	5	165.97	659823355	0.37491	0.49982
1516	JHI-Hv50k-2016-364026	5	166.15	662995889	0.128196	0.137673
1517	JHI-Hv50k-2016-363837	5	166.32	662628744	0.371527	0.493102
1518	JHI-Hv50k-2016-363644	5	166.67	662197221	0.374937	0.499875
1519	SCRI_RS_110018	5	166.74	662133845	0.0997137	0.105253
1520	JHI-Hv50k-2016-363915	5	166.81	662807282	0.371138	0.492336
1521	JHI-Hv50k-2016-363905	5	167.17	662755416	0.359715	0.470312
1522	JHI-Hv50k-2016-364374	5	167.71	663482485	0.358887	0.46875
1523	JHI-Hv50k-2016-364126	5	167.81	663083251	0.374639	0.499279
1524	JHI-Hv50k-2016-364798	5	167.92	664222301	0.157082	0.171847
1525	JHI-Hv50k-2016-365671	5	168.12	665033674	0.374796	0.499592
1526	JHI-Hv50k-2016-366064	5	168.54	666185547	0.374876	0.499752
1527	JHI-Hv50k-2016-367342	5	168.89	668430624	0.374997	0.499995
1528	SCRI_RS_10702	5	169.13	668442300	0.364866	0.480126
1529	SCRI_RS_127921	5	169.38	667021271	0.37499	0.49998
1530	JHI-Hv50k-2016-368816	6	0	1580570	0.367545	0.485306
1531	JHI-Hv50k-2016-369461	6	0.28	4782828	0.374358	0.498718
1532	JHI-Hv50k-2016-369605	6	0.5	4826215	0.369165	0.488463
1533	SCRI_RS_10770	6	1.42	5169774	0.363155	0.476847
1534	JHI-Hv50k-2016-370455	6	1.84	5697038	0.37499	0.49998
1535	JHI-Hv50k-2016-370565	6	2.62	5819639	0.374937	0.499875
1536	JHI-Hv50k-2016-369292	6	2.72	3970079	0.169036	0.186411
1537	JHI-Hv50k-2016-369071	6	3.1	3204206	0.135455	0.146133
1538	JHI-Hv50k-2016-368201	6	3.75	958717	0.374797	0.499594
1539	JHI-Hv50k-2016-368230	6	4.08	965055	0.37491	0.49982
1540	JHI-Hv50k-2016-368763	6	4.82	1357263	0.374342	0.498685
1541	JHI-Hv50k-2016-370907	6	5.24	6352740	0.37496	0.49992
1542	JHI-Hv50k-2016-371448	6	7.15	7467248	0.373145	0.496303
1543	BOPA2_12_30651	6	9.84	7701030	0.365825	0.481974
1544	JHI-Hv50k-2016-371719	6	10.13	7879728	0.365449	0.48125
1545	SCRI_RS_231003	6	10.84	8933544	0.374839	0.499678
1546	JHI-Hv50k-2016-375012	6	11.94	13952837	0.360121	0.471078
1547	JHI-Hv50k-2016-374033	6	13.53	12464231	0.374989	0.499979
1548	JHI-Hv50k-2016-374056	6	13.67	12505810	0.365825	0.481974
1549	JHI-Hv50k-2016-375644	6	13.75	14928114	0.190577	0.213333
1550	JHI-Hv50k-2016-375891	6	14.7	15314550	0.24072	0.279889
1551	JHI-Hv50k-2016-376058	6	15.03	15538291	0.332093	0.420506
1552	JHI-Hv50k-2016-374121	6	15.16	12662385	0.374937	0.499875
1553	JHI-Hv50k-2016-374334	6	15.58	13212190	0.255924	0.301321
1554	JHI-Hv50k-2016-376481	6	15.69	16103701	0.314627	0.391111
1555	JHI-Hv50k-2016-374374	6	15.72	13271453	0.347041	0.446902
1556	JHI-Hv50k-2016-374265	6	16.01	13136360	0.303688	0.373403
1557	JHI-Hv50k-2016-375038	6	16.08	13960545	0.334254	0.424246
1558	JHI-Hv50k-2016-374987	6	16.15	13935054	0.368917	0.487978
1559	JHI-Hv50k-2016-376572	6	16.38	16152314	0.373302	0.496615
1560	JHI-Hv50k-2016-377268	6	17.08	16481017	0.35671	0.464669
1561	BOPA2_12_30842	6	17.71	14332107	0.374977	0.499955
1562	JHI-Hv50k-2016-377312	6	18.57	16583609	0.374748	0.499496
1563	BOPA2_12_30603	6	21.44	17924349	0.338379	0.431456
1564	JHI-Hv50k-2016-377677	6	24.36	16890650	0.372551	0.495127
1565	JHI-Hv50k-2016-377584	6	24.58	16746504	0.336086	0.427438
1566	JHI-Hv50k-2016-377967	6	24.65	17641459	0.374997	0.499995
1567	JHI-Hv50k-2016-379431	6	27.39	23928817	0.210976	0.239705
1568	JHI-Hv50k-2016-379330	6	27.95	22895578	0.292176	0.355292
1569	JHI-Hv50k-2016-378076	6	28.47	18826164	0.37496	0.499919
1570	JHI-Hv50k-2016-378969	6	28.51	21409166	0.37499	0.49998
1571	BOPA1_4611-178	6	28.54	21816820	0.374997	0.499995
1572	JHI-Hv50k-2016-379107	6	28.9	22019030	0.325666	0.409519
1573	JHI-Hv50k-2016-379197	6	30.1	22257115	0.364866	0.480126
1574	JHI-Hv50k-2016-379163	6	30.17	22231281	0.311398	0.385831
1575	JHI-Hv50k-2016-379211	6	30.24	22274769	0.365645	0.481627
1576	JHI-Hv50k-2016-379579	6	31.94	24329515	0.37496	0.49992
1577	JHI-Hv50k-2016-380423	6	32.37	26808628	0.366733	0.483732
1578	JHI-Hv50k-2016-379838	6	33.22	25047267	0.370487	0.491054
1579	JHI-Hv50k-2016-379979	6	35.62	25304115	0.374937	0.499874
1580	JHI-Hv50k-2016-380091	6	35.8	25866346	0.352259	0.456417
1581	JHI-Hv50k-2016-379923	6	35.98	25291141	0.157082	0.171847
1582	JHI-Hv50k-2016-380509	6	36.97	28142845	0.373302	0.496615
1583	JHI-Hv50k-2016-380492	6	37.54	27834646	0.345287	0.443739
1584	JHI-Hv50k-2016-381219	6	38.96	30377738	0.372089	0.494212
1585	JHI-Hv50k-2016-380965	6	39.55	29624546	0.181612	0.202018
1586	BOPA2_12_30361	6	41.01	30508253	0.37491	0.49982
1587	JHI-Hv50k-2016-381470	6	42.28	30784248	0.373168	0.49635
1588	JHI-Hv50k-2016-381313	6	43.7	30607435	0.234468	0.271258
1589	JHI-Hv50k-2016-382667	6	43.77	34832737	0.375	0.5
1590	JHI-Hv50k-2016-383480	6	44.05	36632416	0.374261	0.498525
1591	JHI-Hv50k-2016-383635	6	46.1	37240381	0.374577	0.499154
1592	JHI-Hv50k-2016-383599	6	46.25	37017917	0.374571	0.499143
1593	JHI-Hv50k-2016-383920	6	46.67	38151700	0.374877	0.499755
1594	JHI-Hv50k-2016-384379	6	47.52	39764633	0.373893	0.497792
1595	JHI-Hv50k-2016-384271	6	47.73	39432561	0.374785	0.49957
1596	JHI-Hv50k-2016-384307	6	47.95	39466915	0.374997	0.499995
1597	JHI-Hv50k-2016-383565	6	48.74	36909344	0.310012	0.383578
1598	JHI-Hv50k-2016-385015	6	48.87	41917814	0.374095	0.498192
1599	JHI-Hv50k-2016-384334	6	48.94	39470226	0.374997	0.499995
1600	JHI-Hv50k-2016-384979	6	49.01	41765859	0.350334	0.452887
1601	BOPA1_6018-235	6	49.22	47366298	0.375	0.5
1602	JHI-Hv50k-2016-397327	6	49.44	338285314	0.148857	0.161975
1603	SCRI_RS_196459	6	49.5	293030582	0.374997	0.499995
1604	JHI-Hv50k-2016-389112	6	49.74	83656417	0.374436	0.498873
1605	BOPA1_3764-666	6	49.79	48979786	0.374937	0.499875
1606	JHI-Hv50k-2016-389494	6	50.21	89573494	0.157082	0.171847
1607	JHI-Hv50k-2016-394051	6	50.24	190269991	0.363155	0.476847
1608	BOPA1_1009-1089	6	50.76	109120105	0.265671	0.315414
1609	JHI-Hv50k-2016-390392	6	51.52	107463000	0.28696	0.347253
1610	JHI-Hv50k-2016-390119	6	52.05	97840418	0.34871	0.449928
1611	BOPA1_4258-1498	6	52.62	132308055	0.374997	0.499995
1612	JHI-Hv50k-2016-390861	6	52.69	118998875	0.37475	0.499499
1613	JHI-Hv50k-2016-390577	6	52.8	115446425	0.37496	0.49992
1614	JHI-Hv50k-2016-391531	6	52.83	131705555	0.37496	0.49992
1615	JHI-Hv50k-2016-389624	6	52.9	91923483	0.374577	0.499154
1616	JHI-Hv50k-2016-392258	6	53.33	146604548	0.37491	0.49982
1617	JHI-Hv50k-2016-390799	6	53.43	117912149	0.304688	0.375
1618	JHI-Hv50k-2016-294835	6	53.47	139736790	0.374639	0.499279
1619	JHI-Hv50k-2016-392315	6	53.54	147877333	0.374838	0.499675
1620	BOPA2_12_21482	6	53.6	351737595	0.322775	0.404643
1621	SCRI_RS_121418	6	53.61	145009475	0.374877	0.499753
1622	JHI-Hv50k-2016-392119	6	53.82	145799769	0.37499	0.49998
1623	JHI-Hv50k-2016-396693	6	54.02	327236057	0.130511	0.140362
1624	JHI-Hv50k-2016-391697	6	54.07	134061610	0.374877	0.499753
1625	SCRI_RS_11588	6	54.18	152364422	0.371359	0.49277
1626	JHI-Hv50k-2016-393199	6	54.61	167654160	0.351746	0.455475
1627	JHI-Hv50k-2016-392048	6	54.74	144739550	0.359304	0.469536
1628	JHI-Hv50k-2016-391924	6	54.75	144015513	0.37484	0.49968
1629	JHI-Hv50k-2016-394621	6	54.82	224545791	0.364535	0.47949
1630	JHI-Hv50k-2016-396697	6	54.85	327239397	0.362431	0.475465
1631	JHI-Hv50k-2016-397602	6	54.96	343187838	0.373785	0.497577
1632	JHI-Hv50k-2016-397954	6	55.02	348618495	0.313832	0.389807
1633	BOPA1_210-450	6	55.03	359588787	0.37499	0.49998
1634	JHI-Hv50k-2016-398315	6	55.08	353413357	0.237156	0.274956
1635	JHI-Hv50k-2016-394884	6	55.21	240373116	0.364535	0.47949
1636	JHI-Hv50k-2016-392699	6	55.84	154903357	0.340758	0.435656
1637	SCRI_RS_226330	6	59.63	409523008	0.366436	0.483156
1638	SCRI_RS_129321	6	59.91	404717696	0.374188	0.498378
1639	JHI-Hv50k-2016-404465	6	59.92	414962817	0.37496	0.49992
1640	SCRI_RS_170672	6	60.06	408534083	0.375	0.5
1641	JHI-Hv50k-2016-404715	6	60.13	417828955	0.366436	0.483156
1642	JHI-Hv50k-2016-405285	6	60.2	424209662	0.227706	0.262037
1643	SCRI_RS_168964	6	60.39	432107382	0.325208	0.408744
1644	JHI-Hv50k-2016-405321	6	60.48	424354945	0.372567	0.495157
1645	JHI-Hv50k-2016-406906	6	60.55	459506611	0.303688	0.373403
1646	SCRI_RS_211289	6	60.62	425269533	0.371734	0.493511
1647	SCRI_RS_236545	6	60.72	634732801	0.228709	0.263398
1648	JHI-Hv50k-2016-406397	6	60.8	442231048	0.370106	0.490306
1649	JHI-Hv50k-2016-407075	6	60.91	460162406	0.368877	0.487901
1650	SCRI_RS_125526	6	61.05	460615165	0.371734	0.493511
1651	JHI-Hv50k-2016-406678	6	61.38	452114186	0.346454	0.445842
1652	JHI-Hv50k-2016-407247	6	62.75	461432258	0.364535	0.47949
1653	JHI-Hv50k-2016-394717	6	63.46	229191688	0.360121	0.471078
1654	JHI-Hv50k-2016-408298	6	63.88	475606604	0.323239	0.405422
1655	JHI-Hv50k-2016-409340	6	64.36	483150567	0.121155	0.129547
1656	JHI-Hv50k-2016-408493	6	64.38	477280685	0.370106	0.490306
1657	JHI-Hv50k-2016-408588	6	64.45	477801227	0.374509	0.499019
1658	JHI-Hv50k-2016-409337	6	65.02	483143864	0.106636	0.113023
1659	SCRI_RS_165986	6	65.58	478197375	0.374278	0.498559
1660	JHI-Hv50k-2016-408985	6	65.93	479726357	0.37496	0.49992
1661	JHI-Hv50k-2016-409568	6	66.01	486604841	0.374358	0.498718
1662	BOPA1_3048-1349	6	66.08	498863494	0.355202	0.461859
1663	SCRI_RS_140155	6	68.2	500735756	0.37496	0.49992
1664	JHI-Hv50k-2016-411901	6	68.48	506195397	0.34871	0.449928
1665	JHI-Hv50k-2016-412218	6	68.91	507545254	0.351899	0.455756
1666	SCRI_RS_204363	6	69.05	510938368	0.367025	0.484297
1667	SCRI_RS_16773	6	70.41	91484910	0.37499	0.49998
1668	JHI-Hv50k-2016-412988	6	71.19	515254305	0.353265	0.458272
1669	JHI-Hv50k-2016-412816	6	71.67	512835460	0.373886	0.497778
1670	JHI-Hv50k-2016-413028	6	71.78	515528779	0.372089	0.494212
1671	SCRI_RS_153227	6	71.88	517961155	0.374838	0.499675
1672	JHI-Hv50k-2016-413143	6	72.03	516793766	0.336775	0.428642
1673	JHI-Hv50k-2016-412905	6	72.17	514099813	0.371359	0.49277
1674	JHI-Hv50k-2016-415668	6	72.2	533877840	0.107233	0.113696
1675	JHI-Hv50k-2016-413644	6	72.24	520320823	0.373997	0.497997
1676	BOPA1_4454-1080	6	72.31	521667884	0.370545	0.491167
1677	BOPA2_12_30573	6	72.37	519372817	0.33539	0.426223
1678	SCRI_RS_221951	6	72.38	521785189	0.370545	0.491167
1679	JHI-Hv50k-2016-413752	6	72.95	521539382	0.293268	0.356989
1680	SCRI_RS_171096	6	73.17	522766967	0.370962	0.491988
1681	JHI-Hv50k-2016-413743	6	73.37	521538052	0.367593	0.485399
1682	SCRI_RS_152224	6	73.8	91716994	0.370962	0.491988
1683	JHI-Hv50k-2016-413976	6	73.98	524731859	0.353898	0.459442
1684	SCRI_RS_100903	6	75.04	529227135	0.373029	0.496074
1685	JHI-Hv50k-2016-414738	6	75.5	528057335	0.333541	0.423009
1686	JHI-Hv50k-2016-414911	6	75.64	529575496	0.373029	0.496074
1687	JHI-Hv50k-2016-414876	6	75.78	529217968	0.373785	0.497577
1688	JHI-Hv50k-2016-415565	6	75.96	533209080	0.355798	0.462967
1689	JHI-Hv50k-2016-415103	6	76.48	530324040	0.370729	0.491529
1690	JHI-Hv50k-2016-414958	6	77.09	529879937	0.346841	0.446541
1691	JHI-Hv50k-2016-415326	6	77.77	531859919	0.169982	0.187574
1692	JHI-Hv50k-2016-415658	6	78.12	533616336	0.37475	0.499499
1693	JHI-Hv50k-2016-415572	6	78.2	533268641	0.375	0.5
1694	JHI-Hv50k-2016-416043	6	78.4	535577507	0.37499	0.49998
1695	JHI-Hv50k-2016-416287	6	78.64	536277760	0.24072	0.279889
1696	JHI-Hv50k-2016-416097	6	79	535837305	0.240211	0.279182
1697	JHI-Hv50k-2016-416237	6	79.07	536080684	0.24072	0.279889
1698	JHI-Hv50k-2016-416380	6	79.6	536573612	0.305691	0.376608
1699	JHI-Hv50k-2016-416598	6	80.85	538074371	0.221163	0.253225
1700	JHI-Hv50k-2016-416642	6	81.3	538106115	0.330288	0.417399
1701	JHI-Hv50k-2016-416739	6	81.74	538498106	0.374188	0.498378
1702	JHI-Hv50k-2016-416777	6	82.37	538635801	0.37484	0.49968
1703	JHI-Hv50k-2016-416887	6	82.65	539745374	0.373672	0.497351
1704	JHI-Hv50k-2016-416933	6	84.48	540211351	0.315937	0.393266
1705	BOPA1_5926-798	6	85.76	541489081	0.353898	0.459442
1706	JHI-Hv50k-2016-417229	6	85.84	541831843	0.374977	0.499955
1707	JHI-Hv50k-2016-417029	6	85.88	540809136	0.374697	0.499394
1708	JHI-Hv50k-2016-417195	6	86.26	541674533	0.372551	0.495127
1709	JHI-Hv50k-2016-417362	6	86.76	542414146	0.352409	0.456693
1710	JHI-Hv50k-2016-417671	6	86.97	543738571	0.37491	0.49982
1711	JHI-Hv50k-2016-417889	6	87.32	544593975	0.327571	0.412754
1712	JHI-Hv50k-2016-418255	6	87.61	545563147	0.373554	0.497116
1713	JHI-Hv50k-2016-417928	6	87.75	544657143	0.366076	0.482459
1714	SCRI_RS_222802	6	88.6	545740702	0.373893	0.497792
1715	JHI-Hv50k-2016-418661	6	88.74	546166003	0.37499	0.49998
1716	JHI-Hv50k-2016-418778	6	88.88	546518078	0.374908	0.499815
1717	JHI-Hv50k-2016-419155	6	90.14	547553206	0.374577	0.499154
1718	JHI-Hv50k-2016-421248	6	91.1	553903312	0.34225	0.438306
1719	JHI-Hv50k-2016-421298	6	91.58	553922774	0.35054	0.453264
1720	SCRI_RS_152228	6	92.07	19924584	0.373997	0.497997
1721	JHI-Hv50k-2016-421972	6	92.23	556373783	0.37343	0.49687
1722	JHI-Hv50k-2016-418730	6	92.28	546497956	0.37499	0.49998
1723	JHI-Hv50k-2016-421716	6	92.55	555747524	0.321581	0.40264
1724	JHI-Hv50k-2016-421703	6	93.04	555717271	0.374839	0.499678
1725	JHI-Hv50k-2016-419606	6	93.13	548941152	0.37496	0.499919
1726	JHI-Hv50k-2016-420407	6	93.48	551257392	0.361598	0.473878
1727	JHI-Hv50k-2016-420344	6	93.63	550913584	0.361302	0.473317
1728	JHI-Hv50k-2016-422470	6	94.02	557776009	0.230903	0.266384
1729	JHI-Hv50k-2016-420569	6	94.9	551991927	0.374275	0.498553
1730	JHI-Hv50k-2016-421076	6	94.97	553018087	0.373291	0.496594
1731	JHI-Hv50k-2016-422456	6	94.99	557710790	0.369128	0.48839
1732	JHI-Hv50k-2016-421149	6	95.04	553265013	0.362267	0.475151
1733	JHI-Hv50k-2016-422609	6	95.48	558057438	0.217818	0.248758
1734	JHI-Hv50k-2016-421802	6	97.38	555831111	0.374639	0.499279
1735	SCRI_RS_223732	6	99.15	554913615	0.366133	0.48257
1736	JHI-Hv50k-2016-422535	6	100.64	557893162	0.373302	0.496615
1737	SCRI_RS_189611	6	100.85	559878297	0.371359	0.49277
1738	JHI-Hv50k-2016-423501	6	100.99	560159376	0.374083	0.498169
1739	JHI-Hv50k-2016-423970	6	102.05	561800560	0.374877	0.499755
1740	JHI-Hv50k-2016-424195	6	102.92	562349621	0.17041	0.188101
1741	JHI-Hv50k-2016-424084	6	102.97	561989108	0.361302	0.473317
1742	JHI-Hv50k-2016-424258	6	103.92	562781468	0.211947	0.240983
1743	JHI-Hv50k-2016-424485	6	104.92	563104662	0.311883	0.386621
1744	JHI-Hv50k-2016-425379	6	104.96	565063591	0.37399	0.497984
1745	JHI-Hv50k-2016-424867	6	105.1	563996319	0.374837	0.499673
1746	JHI-Hv50k-2016-425636	6	105.17	565516728	0.37484	0.49968
1747	JHI-Hv50k-2016-424321	6	105.24	562817846	0.315525	0.392588
1748	JHI-Hv50k-2016-425785	6	105.31	565686436	0.374577	0.499154
1749	JHI-Hv50k-2016-426124	6	105.52	566296188	0.330616	0.417962
1750	JHI-Hv50k-2016-425919	6	105.59	565792527	0.368455	0.487076
1751	SCRI_RS_182275	6	105.92	565354818	0.370298	0.490683
1752	JHI-Hv50k-2016-426290	6	109.91	566731846	0.356346	0.463989
1753	JHI-Hv50k-2016-426355	6	111.9	566944121	0.201272	0.227048
1754	JHI-Hv50k-2016-426454	6	112.4	567221199	0.310012	0.383578
1755	JHI-Hv50k-2016-426709	6	112.89	567913264	0.37491	0.49982
1756	SCRI_RS_157323	6	113.17	571454032	0.367593	0.485399
1757	JHI-Hv50k-2016-427343	6	113.21	571144737	0.373785	0.497577
1758	SCRI_RS_161343	6	113.24	571367939	0.374695	0.49939
1759	JHI-Hv50k-2016-427112	6	114.87	570137247	0.374509	0.499019
1760	JHI-Hv50k-2016-428216	6	115.01	572779671	0.374877	0.499755
1761	BOPA1_1007-651	6	115.93	574051819	0.319034	0.398393
1762	JHI-Hv50k-2016-428246	6	115.94	572790688	0.374797	0.499594
1763	SCRI_RS_226875	6	115.97	92723418	0.328167	0.41377
1764	SCRI_RS_126069	6	116.01	92767626	0.370701	0.491475
1765	JHI-Hv50k-2016-428953	6	116.15	574797785	0.368917	0.487978
1766	JHI-Hv50k-2016-429028	6	116.22	575038639	0.356922	0.465065
1767	SCRI_RS_159529	6	117.81	575423184	0.374271	0.498544
1768	SCRI_RS_10655	6	117.99	576542953	0.373157	0.496327
1769	BOPA1_4126-1180	6	118.56	577508241	0.369646	0.489405
1770	JHI-Hv50k-2016-430267	6	118.98	577459725	0.374697	0.499394
1771	JHI-Hv50k-2016-431815	6	119.06	579519901	0.163385	0.179493
1772	JHI-Hv50k-2016-431138	6	119.12	578729042	0.374937	0.499875
1773	JHI-Hv50k-2016-432279	6	120.24	579880927	0.37328	0.496572
1774	JHI-Hv50k-2016-433188	6	121.68	581422140	0.375	0.5
1775	JHI-Hv50k-2016-431958	6	122.16	579596681	0.371114	0.492287
1776	JHI-Hv50k-2016-434473	6	126.49	583266977	0.375	0.5
1777	JHI-Hv50k-2016-437051	7	0.21	2084891	0.374977	0.499955
1778	JHI-Hv50k-2016-437709	7	0.57	2546649	0.374015	0.498034
1779	JHI-Hv50k-2016-437689	7	0.74	2527977	0.336349	0.427896
1780	SCRI_RS_166511	7	0.92	2610855	0.360426	0.471655
1781	JHI-Hv50k-2016-438007	7	1.49	2728440	0.315937	0.393266
1782	JHI-Hv50k-2016-440886	7	1.56	5166025	0.374796	0.499592
1783	JHI-Hv50k-2016-439028	7	1.63	3756293	0.375	0.5
1784	JHI-Hv50k-2016-442303	7	2.05	6718326	0.354382	0.460338
1785	JHI-Hv50k-2016-441585	7	2.76	5507675	0.349799	0.451911
1786	JHI-Hv50k-2016-446019	7	3.71	10427448	0.366869	0.483995
1787	JHI-Hv50k-2016-443311	7	3.97	7625616	0.374748	0.499496
1788	JHI-Hv50k-2016-444990	7	5.02	9464450	0.294352	0.358676
1789	JHI-Hv50k-2016-445336	7	5.93	9880616	0.374976	0.499953
1790	JHI-Hv50k-2016-444581	7	6.39	9177073	0.296945	0.362732
1791	JHI-Hv50k-2016-445468	7	6.85	9915132	0.374275	0.498553
1792	JHI-Hv50k-2016-449199	7	7.32	13674178	0.368917	0.487978
1793	JHI-Hv50k-2016-447364	7	7.78	11508159	0.361684	0.474043
1794	JHI-Hv50k-2016-447710	7	8.71	12705337	0.37484	0.49968
1795	JHI-Hv50k-2016-447196	7	9.07	11285535	0.374909	0.499819
1796	SCRI_RS_186187	7	9.65	15061564	0.363078	0.476699
1797	JHI-Hv50k-2016-448120	7	9.77	12948541	0.322517	0.404209
1798	SCRI_RS_111979	7	11.05	12890134	0.374877	0.499753
1799	JHI-Hv50k-2016-447970	7	11.3	12880607	0.373029	0.496074
1800	JHI-Hv50k-2016-449475	7	11.54	14294840	0.374429	0.498859
1801	JHI-Hv50k-2016-449631	7	11.69	14573494	0.266982	0.317332
1802	JHI-Hv50k-2016-449360	7	11.83	14115192	0.374358	0.498718
1803	JHI-Hv50k-2016-451555	7	12.49	17693379	0.365261	0.480887
1804	JHI-Hv50k-2016-450673	7	13.6	16241963	0.37484	0.49968
1805	SCRI_RS_235422	7	13.88	15923460	0.374937	0.499874
1806	JHI-Hv50k-2016-451655	7	13.95	18344824	0.374937	0.499875
1807	JHI-Hv50k-2016-451807	7	14.66	18519291	0.366436	0.483156
1808	JHI-Hv50k-2016-452259	7	15.37	19053643	0.37499	0.49998
1809	JHI-Hv50k-2016-452629	7	16.34	20021934	0.364128	0.47871
1810	JHI-Hv50k-2016-452655	7	17.32	20074411	0.151629	0.165289
1811	JHI-Hv50k-2016-452092	7	17.49	18910755	0.371734	0.493511
1812	JHI-Hv50k-2016-452550	7	17.56	19918528	0.37475	0.499499
1813	JHI-Hv50k-2016-452666	7	17.99	20275597	0.371914	0.493866
1814	JHI-Hv50k-2016-452744	7	18.29	21067964	0.35671	0.464669
1815	JHI-Hv50k-2016-452873	7	20.82	23169138	0.37499	0.49998
1816	SCRI_RS_179528	7	20.96	23277506	0.371713	0.493469
1817	JHI-Hv50k-2016-453151	7	21.39	24061826	0.373893	0.497792
1818	JHI-Hv50k-2016-452991	7	21.64	23582473	0.0943467	0.0992744
1819	SCRI_RS_47235	7	22.73	25425538	0.374937	0.499875
1820	JHI-Hv50k-2016-454074	7	23.3	26408386	0.373302	0.496615
1821	JHI-Hv50k-2016-454253	7	23.65	26737545	0.351746	0.455475
1822	JHI-Hv50k-2016-454335	7	23.73	26817144	0.373302	0.496615
1823	JHI-Hv50k-2016-455140	7	23.76	27989098	0.232484	0.268542
1824	JHI-Hv50k-2016-455799	7	23.8	29729518	0.190991	0.213859
1825	JHI-Hv50k-2016-454690	7	24.08	27507809	0.373004	0.496024
1826	SCRI_RS_219709	7	24.15	28112055	0.374639	0.499279
1827	JHI-Hv50k-2016-455651	7	24.33	29236543	0.373778	0.497561
1828	SCRI_RS_150053	7	27.34	31222419	0.356469	0.464218
1829	SCRI_RS_106456	7	27.62	31337461	0.374632	0.499265
1830	JHI-Hv50k-2016-455713	7	28.04	29566833	0.370756	0.491583
1831	JHI-Hv50k-2016-456287	7	29.05	30863841	0.372886	0.495789
1832	SCRI_RS_149724	7	29.55	30701587	0.37496	0.49992
1833	JHI-Hv50k-2016-456115	7	29.89	30561806	0.37207	0.494175
1834	JHI-Hv50k-2016-458331	7	29.96	34399413	0.374937	0.499875
1835	JHI-Hv50k-2016-457631	7	31.58	32493764	0.374877	0.499753
1836	JHI-Hv50k-2016-459470	7	32.79	37805069	0.37342	0.496851
1837	BK_05	7	34.21	39681222	0.370043	0.490182
1838	JHI-Hv50k-2016-460106	7	34.28	40907438	0.375	0.5
1839	JHI-Hv50k-2016-459978	7	34.35	40404951	0.37491	0.49982
1840	JHI-Hv50k-2016-461113	7	37.7	45665101	0.151842	0.165545
1841	JHI-Hv50k-2016-460794	7	38.21	43145614	0.123518	0.132265
1842	JHI-Hv50k-2016-461230	7	38.72	46835174	0.368622	0.487402
1843	JHI-Hv50k-2016-461139	7	38.81	45707876	0.37499	0.49998
1844	SCRI_RS_91662	7	40.65	47583134	0.374877	0.499755
1845	BOPA2_12_30143	7	41.43	48203463	0.374748	0.499496
1846	JHI-Hv50k-2016-461642	7	41.71	48517499	0.294352	0.358676
1847	SCRI_RS_223017	7	42	48405886	0.374509	0.499019
1848	JHI-Hv50k-2016-462290	7	43.84	50107615	0.37496	0.499919
1849	JHI-Hv50k-2016-463320	7	43.91	52168557	0.368139	0.486461
1850	JHI-Hv50k-2016-463406	7	44.32	52450538	0.363509	0.477523
1851	JHI-Hv50k-2016-463397	7	44.41	52407293	0.374509	0.499019
1852	JHI-Hv50k-2016-463337	7	44.83	52283255	0.369879	0.48986
1853	JHI-Hv50k-2016-463374	7	45.84	52394960	0.37475	0.499499
1854	JHI-Hv50k-2016-464036	7	46.39	54651216	0.374977	0.499955
1855	JHI-Hv50k-2016-461354	7	46.71	47480839	0.362717	0.476009
1856	JHI-Hv50k-2016-464308	7	47.03	55241859	0.37484	0.49968
1857	JHI-Hv50k-2016-464339	7	47.31	55256600	0.372582	0.495188
1858	JHI-Hv50k-2016-464490	7	47.59	56319478	0.307633	0.379731
1859	JHI-Hv50k-2016-464786	7	48.73	57649623	0.375	0.5
1860	JHI-Hv50k-2016-465824	7	49.33	62460279	0.370929	0.491924
1861	SCRI_RS_171008	7	49.86	61623057	0.374275	0.498553
1862	SCRI_RS_202653	7	49.89	59710274	0.228206	0.262716
1863	SCRI_RS_196063	7	51.98	65071681	0.374432	0.498866
1864	JHI-Hv50k-2016-466953	7	52.27	65434535	0.373302	0.496615
1865	JHI-Hv50k-2016-466990	7	52.97	65632392	0.350334	0.452887
1866	JHI-Hv50k-2016-467349	7	56.89	66743526	0.354109	0.459831
1867	JHI-Hv50k-2016-468052	7	57.89	69938536	0.369128	0.48839
1868	JHI-Hv50k-2016-468192	7	57.93	70525896	0.365127	0.48063
1869	BOPA1_2669-1012	7	58.04	70162054	0.373554	0.497116
1870	JHI-Hv50k-2016-468636	7	58.14	72974093	0.374937	0.499873
1871	JHI-Hv50k-2016-468061	7	58.87	69981977	0.374188	0.498378
1872	JHI-Hv50k-2016-468869	7	59.8	75059390	0.26435	0.313486
1873	JHI-Hv50k-2016-468175	7	60.69	70503552	0.374937	0.499874
1874	JHI-Hv50k-2016-468035	7	61.11	69933106	0.368663	0.487482
1875	BOPA2_12_31357	7	61.19	68396239	0.35659	0.464444
1876	JHI-Hv50k-2016-469172	7	61.33	77745662	0.352409	0.456693
1877	JHI-Hv50k-2016-469609	7	61.47	81670297	0.371549	0.493145
1878	JHI-Hv50k-2016-469734	7	61.61	82424371	0.330616	0.417962
1879	JHI-Hv50k-2016-469970	7	62.11	84257535	0.374909	0.499819
1880	JHI-Hv50k-2016-470645	7	62.18	87916840	0.373893	0.497792
1881	SCRI_RS_182	7	63.95	94005875	0.369336	0.488798
1882	JHI-Hv50k-2016-472488	7	64.21	98424042	0.332093	0.420506
1883	JHI-Hv50k-2016-472007	7	64.57	95638185	0.373785	0.497577
1884	JHI-Hv50k-2016-471568	7	64.92	91724924	0.349799	0.451911
1885	JHI-Hv50k-2016-473212	7	65.12	105061725	0.364535	0.47949
1886	JHI-Hv50k-2016-472788	7	65.27	101902628	0.374977	0.499955
1887	BOPA1_3186-1560	7	65.44	110758014	0.374506	0.499012
1888	JHI-Hv50k-2016-472983	7	65.62	102719226	0.374639	0.499279
1889	JHI-Hv50k-2016-472617	7	65.76	99420096	0.261674	0.309601
1890	JHI-Hv50k-2016-473227	7	65.96	107731314	0.370268	0.490623
1891	JHI-Hv50k-2016-494930	7	66.64	600507352	0.345874	0.444796
1892	JHI-Hv50k-2016-473663	7	67.25	114662499	0.361976	0.474598
1893	JHI-Hv50k-2016-473774	7	67.28	115429145	0.37496	0.49992
1894	JHI-Hv50k-2016-473453	7	67.32	112343687	0.333541	0.423009
1895	BOPA2_12_30496	7	67.42	116658838	0.37499	0.49998
1896	JHI-Hv50k-2016-475327	7	67.6	146582048	0.37399	0.497984
1897	JHI-Hv50k-2016-475633	7	67.85	161040482	0.365191	0.480752
1898	JHI-Hv50k-2016-475614	7	67.99	150611802	0.374697	0.499394
1899	JHI-Hv50k-2016-475638	7	68	164658594	0.363155	0.476847
1900	JHI-Hv50k-2016-475592	7	68.06	150365424	0.374697	0.499394
1901	JHI-Hv50k-2016-115172	7	68.36	692450921	0.359412	0.46974
1902	JHI-Hv50k-2016-474880	7	68.41	141981874	0.374436	0.498873
1903	JHI-Hv50k-2016-475639	7	68.72	166036314	0.126207	0.135369
1904	BOPA2_12_31120	7	69.09	176885969	0.374509	0.499019
1905	BOPA1_5-1593	7	69.26	176154907	0.374432	0.498866
1906	JHI-Hv50k-2016-73673	7	69.45	29625497	0.308724	0.381492
1907	JHI-Hv50k-2016-475672	7	69.78	190137585	0.359615	0.470123
1908	BOPA2_12_30344	7	70.07	180474019	0.352108	0.456139
1909	JHI-Hv50k-2016-481258	7	70.5	325104937	0.37484	0.49968
1910	JHI-Hv50k-2016-475914	7	70.54	225593178	0.37499	0.49998
1911	JHI-Hv50k-2016-475706	7	70.55	206559049	0.294352	0.358676
1912	JHI-Hv50k-2016-483333	7	70.57	385858552	0.367497	0.485212
1913	JHI-Hv50k-2016-475876	7	70.58	225228013	0.37499	0.49998
1914	JHI-Hv50k-2016-482996	7	70.61	368771755	0.374509	0.499019
1915	JHI-Hv50k-2016-480017	7	70.68	298441510	0.355798	0.462967
1916	JHI-Hv50k-2016-481538	7	70.8	333366167	0.374432	0.498866
1917	JHI-Hv50k-2016-480103	7	70.93	301830374	0.328023	0.413525
1918	JHI-Hv50k-2016-484962	7	70.96	424607413	0.363509	0.477523
1919	JHI-Hv50k-2016-484210	7	71.25	408938841	0.372089	0.494212
1920	JHI-Hv50k-2016-487194	7	71.58	453951005	0.374509	0.499019
1921	JHI-Hv50k-2016-487285	7	73.16	455901116	0.374997	0.499995
1922	BOPA2_12_21115	7	74.04	471268170	0.213192	0.242625
1923	JHI-Hv50k-2016-487257	7	74.22	455416229	0.372737	0.495494
1924	JHI-Hv50k-2016-487398	7	74.29	459131547	0.330312	0.41744
1925	JHI-Hv50k-2016-487963	7	74.36	495013188	0.28426	0.343129
1926	SCRI_RS_231916	7	74.43	456137737	0.37499	0.49998
1927	JHI-Hv50k-2016-487412	7	74.5	462879245	0.135094	0.14571
1928	JHI-Hv50k-2016-489616	7	74.58	518621212	0.371549	0.493145
1929	JHI-Hv50k-2016-489432	7	74.74	517091581	0.325208	0.408744
1930	JHI-Hv50k-2016-487123	7	75.07	453387674	0.374509	0.499019
1931	BOPA2_12_31513	7	75.14	475182581	0.27137	0.323789
1932	SCRI_RS_190352	7	76.29	518163689	0.373096	0.496207
1933	JHI-Hv50k-2016-490087	7	76.42	522494441	0.374977	0.499955
1934	JHI-Hv50k-2016-489219	7	76.47	515902361	0.152806	0.1667
1935	JHI-Hv50k-2016-489053	7	76.52	512596401	0.21999	0.251655
1936	JHI-Hv50k-2016-490065	7	76.56	522444619	0.374977	0.499955
1937	JHI-Hv50k-2016-490155	7	76.7	522784443	0.374937	0.499875
1938	JHI-Hv50k-2016-491174	7	76.75	537951995	0.37484	0.49968
1939	JHI-Hv50k-2016-490928	7	76.98	534770634	0.374188	0.498378
1940	JHI-Hv50k-2016-490973	7	77	534938213	0.345874	0.444796
1941	JHI-Hv50k-2016-491514	7	77.12	560183221	0.372259	0.494547
1942	JHI-Hv50k-2016-491409	7	77.25	543239570	0.343485	0.440509
1943	JHI-Hv50k-2016-490847	7	77.27	532355891	0.373785	0.497577
1944	JHI-Hv50k-2016-486979	7	77.34	451175301	0.351384	0.45481
1945	JHI-Hv50k-2016-490986	7	77.41	535376086	0.37499	0.49998
1946	JHI-Hv50k-2016-490909	7	77.62	534310236	0.373664	0.497334
1947	BOPA2_12_30999	7	77.83	528801086	0.374997	0.499995
1948	JHI-Hv50k-2016-491516	7	77.9	560941471	0.371914	0.493866
1949	BOPA2_12_30996	7	78.05	554189661	0.230903	0.266384
1950	JHI-Hv50k-2016-491475	7	78.62	546913302	0.312322	0.387338
1951	JHI-Hv50k-2016-491481	7	78.91	547208572	0.312322	0.387338
1952	JHI-Hv50k-2016-492602	7	84.31	589098317	0.185383	0.206758
1953	JHI-Hv50k-2016-491734	7	84.45	573569122	0.373554	0.497116
1954	JHI-Hv50k-2016-491708	7	84.56	571215612	0.178906	0.198634
1955	JHI-Hv50k-2016-491897	7	84.94	575840098	0.28884	0.350139
1956	JHI-Hv50k-2016-491792	7	85.33	574967595	0.245218	0.286163
1957	JHI-Hv50k-2016-491919	7	85.98	576017243	0.374637	0.499274
1958	JHI-Hv50k-2016-492318	7	89.14	578964494	0.360636	0.472052
1959	JHI-Hv50k-2016-492817	7	89.52	590238546	0.373997	0.497997
1960	JHI-Hv50k-2016-492846	7	89.99	590491140	0.358463	0.467954
1961	JHI-Hv50k-2016-492355	7	90.43	581061460	0.207478	0.235119
1962	JHI-Hv50k-2016-492852	7	90.87	590541949	0.358781	0.468551
1963	JHI-Hv50k-2016-493106	7	91.32	591544202	0.27463	0.328628
1964	JHI-Hv50k-2016-492409	7	91.77	582607198	0.343485	0.440509
1965	JHI-Hv50k-2016-493281	7	91.78	592417868	0.366133	0.48257
1966	JHI-Hv50k-2016-493991	7	91.86	597526275	0.30318	0.372592
1967	JHI-Hv50k-2016-493603	7	91.93	593206158	0.374509	0.499019
1968	BOPA2_12_31440	7	92	593707032	0.222817	0.255443
1969	JHI-Hv50k-2016-493972	7	93.02	595623926	0.116381	0.124079
1970	JHI-Hv50k-2016-493969	7	93.58	595405049	0.11185	0.118922
1971	JHI-Hv50k-2016-494046	7	93.84	597901026	0.345283	0.443732
1972	JHI-Hv50k-2016-494035	7	93.87	597897990	0.358135	0.467337
1973	JHI-Hv50k-2016-494138	7	95.25	598676556	0.320271	0.400452
1974	JHI-Hv50k-2016-493928	7	96.06	594980142	0.121155	0.129547
1975	JHI-Hv50k-2016-495677	7	96.36	602678956	0.322414	0.404036
1976	SCRI_RS_152402	7	96.82	601923649	0.374177	0.498357
1977	JHI-Hv50k-2016-494184	7	97.1	598951957	0.373291	0.496594
1978	JHI-Hv50k-2016-494493	7	97.24	599452700	0.374977	0.499955
1979	SCRI_RS_150049	7	97.27	599396580	0.371914	0.493866
1980	JHI-Hv50k-2016-496334	7	97.31	604483774	0.328023	0.413525
1981	JHI-Hv50k-2016-497105	7	97.75	606866283	0.370962	0.491988
1982	JHI-Hv50k-2016-496396	7	98.16	604528561	0.37499	0.49998
1983	JHI-Hv50k-2016-497207	7	98.22	607443116	0.339459	0.433359
1984	JHI-Hv50k-2016-496913	7	98.23	605148916	0.335657	0.426689
1985	JHI-Hv50k-2016-495463	7	98.3	602207079	0.368318	0.48681
1986	JHI-Hv50k-2016-497396	7	98.44	607943785	0.341956	0.437783
1987	JHI-Hv50k-2016-497386	7	99.11	607942420	0.338131	0.43102
1988	JHI-Hv50k-2016-497225	7	99.86	607554135	0.37496	0.49992
1989	JHI-Hv50k-2016-497177	7	99.93	607370278	0.373886	0.497778
1990	SCRI_RS_174285	7	102.19	610822080	0.358778	0.468546
1991	JHI-Hv50k-2016-498082	7	102.2	610745000	0.266982	0.317332
1992	JHI-Hv50k-2016-498168	7	102.34	610996009	0.336775	0.428642
1993	JHI-Hv50k-2016-497727	7	102.35	609406570	0.321948	0.403256
1994	JHI-Hv50k-2016-497640	7	102.8	609010264	0.180887	0.20111
1995	JHI-Hv50k-2016-498181	7	103.05	611106760	0.358355	0.46775
1996	JHI-Hv50k-2016-497686	7	103.25	609393333	0.32288	0.404819
1997	JHI-Hv50k-2016-498356	7	103.54	611213274	0.374788	0.499576
1998	JHI-Hv50k-2016-498862	7	104.14	613490799	0.330005	0.416913
[truncated: 67 more rows]
