# Supplementary material for: Genome-Wide Association Study of Leaf Rust Resistance at Seedling and Adult Plant Stages in a Global Barley Panel
Source: MDPI journal article supplement (doi:10.3390/agriculture12111829), 2022-11-01
Supplement: s1 [file s1 › agriculture-1930506-supplementary/Supplementary Table S5.xlsx]

## Sheet: Supplementary Table S5
Table S5 Principle components PC1 and PC2.
ID	PC1	PC2
AM1	20.9269	29.3512
AM2	-27.5067	-15.3281
AM3	-5.99202	-0.744959
AM4	16.6299	-16.3227
AM5	19.2906	4.75186
AM6	27.03	-35.9787
AM7	-33.4279	-16.7327
AM8	28.9571	3.63546
AM9	-0.819964	0.321041
AM10	19.7691	27.8608
AM11	29.2852	-31.5181
AM12	-21.3633	-2.29063
AM13	21.9032	19.0147
AM14	14.8759	-8.66322
AM15	33.1304	11.2041
AM16	14.8831	-8.66334
AM17	4.65039	1.1021
AM18	18.6217	-14.6323
AM19	28.9851	13.4899
AM20	18.7852	-20.6838
AM21	-19.6242	-1.37058
AM22	-9.21198	-12.053
AM23	19.7791	27.8798
AM24	21.4771	-10.6336
AM25	-9.86639	6.03328
AM26	29.3481	-21.2269
AM27	12.2183	-5.17014
AM28	29.1468	-26.9197
AM29	27.0265	-35.9809
AM30	21.5897	-8.60746
AM31	28.5766	15.9813
AM32	27.0149	-35.9792
AM33	18.441	6.77033
AM34	26.0624	13.0387
AM35	30.9581	9.67523
AM36	23.9378	12.6982
AM37	-22.675	-4.07877
AM38	-6.46013	14.3971
AM39	29.4626	12.4234
AM40	21.2795	-10.2165
AM41	-21.8684	-0.307376
AM42	-22.3735	-4.50211
AM43	-32.4232	-4.20137
AM44	18.8602	-11.9131
AM45	5.9424	22.2291
AM46	-37.5658	-5.42072
AM47	24.965	17.8111
AM48	-2.03429	22.604
AM49	10.692	39.7376
AM50	-41.791	-4.72604
AM51	21.1279	-8.47331
AM52	25.7613	-12.4289
AM53	33.2089	18.8978
AM54	25.8546	-12.383
AM55	34.3146	12.0096
AM56	27.8273	13.1879
AM57	5.75647	9.13945
AM58	11.1476	40.6096
AM59	5.54219	36.3147
AM60	-3.46354	20.7702
AM61	1.74707	26.4166
AM62	-10.0982	21.6162
AM63	-20.92	11.9555
AM64	-14.5644	16.5835
AM65	31.4907	-12.2845
AM66	22.8667	-25.4457
AM67	11.9997	-15.6231
AM68	9.66943	13.2229
AM69	-39.01	-0.048384
AM70	-37.392	-2.23692
AM71	26.8907	12.8251
AM72	-39.7881	-1.17611
AM73	-39.9061	-1.83482
AM74	-44.5327	-7.67127
AM75	-44.5466	-5.18882
AM76	-45.5713	-7.52761
AM77	-45.5782	-1.37826
AM78	-41.0375	-2.59049
AM79	-44.3331	-2.60054
AM80	-42.2609	-12.0529
AM81	-42.9595	-3.02709
AM82	-44.5194	-3.77557
AM83	-35.2099	-11.4469
AM84	-46.0486	-9.12061
AM85	-1.12786	23.1439
AM86	19.0588	29.4854
AM87	-43.397	-4.98672
AM88	-45.7774	-9.13056
AM89	-46.2908	-7.17507
AM90	-40.889	0.0130304
AM91	-44.2773	-2.69545
AM92	-43.7864	-4.30808
AM93	-45.9896	-5.66973
AM94	20.7243	31.1951
AM95	-40.1001	-10.0518
AM96	-45.8737	-3.52458
AM97	-45.3798	-6.42649
AM98	-43.2469	-4.78323
AM99	-7.02764	16.1252
AM100	-2.61419	21.4255
AM101	20.6238	13.7099
AM102	-13.1856	15.3525
AM103	-9.53552	21.9923
AM104	8.74433	37.3141
AM105	-23.4479	10.6842
AM106	-0.148104	23.9221
AM107	28.6287	15.9579
AM108	33.977	10.4711
AM109	-15.0368	-0.870492
AM110	27.3009	15.9064
AM111	10.7604	11.8792
AM112	20.9002	8.30343
AM113	15.3197	36.3916
AM114	30.9514	13.7742
AM115	7.60792	32.0558
AM116	27.1351	-8.51517
AM117	-17.3528	-7.55796
AM118	22.1955	-9.86742
AM119	21.601	-14.895
AM120	23.0127	-15.9562
AM121	31.1651	-19.2461
AM122	23.1939	-12.527
AM123	-45.6543	-3.21868
AM124	-41.0304	-2.57672
AM125	-40.4988	-3.23796
AM126	-47.1448	-5.45821
AM127	-44.4173	-5.03183
AM128	-42.8487	-3.56048
AM129	-40.9704	-7.19587
AM130	-42.2632	-11.722
AM131	-46.5292	-7.07974
AM132	-42.2902	-9.45096
AM133	-39.5167	-6.09875
AM134	-41.4463	-8.20703
AM135	-42.3833	-4.7894
AM136	-44.2046	-5.98605
AM137	-38.2396	-3.67013
AM138	-44.5339	-1.88505
AM139	-21.4511	-8.33877
AM140	-45.2369	-4.7542
AM141	-45.9709	-4.84898
AM142	26.2782	-6.94427
AM143	22.8891	-13.3698
AM144	25.992	-13.307
AM145	22.4735	-14.3464
AM146	-29.9069	-6.85725
AM147	-34.0825	-6.72247
AM148	11.9165	-6.10564
AM149	-33.9742	-6.61066
AM150	-32.1851	-5.76582
AM151	25.1359	-7.32565
AM152	18.5983	-19.2921
AM153	11.8449	-14.6434
AM154	3.16756	-5.41301
AM155	1.25291	-10.8315
AM156	5.84579	4.2312
AM157	22.6247	-2.74567
AM159	32.2452	9.18548
AM161	32.1609	14.9722
AM162	24.2357	10.5207
AM163	24.4203	5.33333
AM164	24.7883	-3.29499
AM165	30.8786	11.5042
AM166	24.7272	-0.686961
AM167	33.6764	0.592396
AM168	11.2325	25.5832
AM169	23.5957	11.1025
AM170	1.0375	26.9934
AM171	-1.77659	-8.70076
AM172	16.042	-7.02087
AM173	16.0832	19.7574
AM174	30.0662	17.6086
AM175	12.6067	15.8284
AM176	-3.62129	20.2333
AM177	10.7396	26.0848
AM178	-8.08829	23.1018
AM179	17.9621	9.63078
AM180	0.104397	16.2049
AM181	8.43122	17.1217
AM182	25.9712	19.7487
AM183	8.89643	16.2154
AM184	5.78819	20.3183
AM185	-8.09121	23.1161
AM186	0.561566	5.05992
AM187	2.47121	23.0466
AM188	31.0376	-21.9355
AM189	23.0352	-15.986
AM190	21.4443	-15.2285
AM191	24.1949	22.4778
AM192	23.9646	-13.8646
AM193	21.419	-14.8661
AM194	28.1162	-20.4371
AM195	24.8865	18.0138
AM196	21.2377	-14.9779
AM197	21.6128	-14.8854
AM198	19.7726	-8.58151
AM199	22.9818	-12.5832
AM200	20.3496	-9.81753
AM201	22.2829	11.3559
AM202	-1.21451	-12.079
AM203	20.1043	-18.235
AM204	-38.3154	-10.0978
AM205	-28.4107	-8.10965
AM206	18.5467	-10.0325
AM207	16.571	12.5815
AM208	25.3419	-16.1481
AM209	29.0183	-19.522
AM210	29.0032	-19.5002
AM211	8.15386	-14.3177
AM212	32.82	-23.3212
AM213	20.7708	-8.13054
AM214	33.0285	-19.8095
AM215	24.3007	5.93198
AM216	2.93694	28.4171
AM217	-20.0679	-5.40043
AM218	20.36	-11.8717
AM219	-21.7879	-2.0638
AM220	-30.4784	-8.9905
AM221	-21.2879	-6.3013
AM222	7.99045	11.9146
AM223	-8.67946	-11.1898
AM224	33.872	14.7593
AM225	27.8599	-34.6299
AM226	23.4257	-12.737
AM227	18.778	-20.6771
AM228	27.2328	-35.8173
AM229	18.7837	-20.682
AM230	-39.8152	-9.92295
AM231	-6.38749	-12.4485
AM232	-19.6135	-13.8313
AM233	-17.6095	-13.7996
AM234	24.7502	0.873619
AM235	-21.6392	-13.358
AM236	30.1747	6.95126
AM237	24.2574	-3.63415
AM238	30.985	8.32716
AM239	26.4372	3.95955
AM240	-18.6577	-10.3253
AM241	-35.3219	-7.58375
AM242	-34.3971	-4.34453
AM243	-21.5797	-12.3746
AM244	-21.2648	-8.6212
AM245	-34.1518	-11.9988
AM246	-20.2846	-13.0648
AM247	-16.8358	-3.24786
AM248	23.0344	23.2261
AM249	-43.3408	-11.5039
AM250	-22.2993	-10.4597
AM251	-19.9502	-14.7092
AM252	-20.2605	-2.33218
AM253	-34.9202	-4.28987
AM254	24.6752	-30.7242
AM255	16.2054	29.5986
AM256	-25.5165	-9.26053
AM257	-12.2458	-11.3528
AM258	-12.1753	-12.7595
AM259	-18.028	23.1051
AM260	9.18068	-5.6808
AM261	-14.3229	24.2687
AM262	-20.0013	20.9777
AM263	-10.1035	26.304
AM264	-9.50153	24.6189
AM265	-11.2941	26.6824
AM266	-21.2636	0.4253
AM267	-19.0344	23.1133
AM268	-9.22948	21.5742
AM269	-14.2131	19.0879
AM270	-15.0456	17.4919
AM271	-15.3148	24.0282
AM272	-23.6636	23.401
AM273	-11.4471	24.7577
AM274	-12.1385	23.3108
AM275	-8.75087	21.5196
AM276	-26.1016	16.3133
AM277	-9.70613	23.2832
AM278	-14.3832	-10.2274
AM279	-20.0611	22.6883
AM280	1.83742	18.9063
AM281	-20.5537	24.7469
AM282	-9.98261	16.9012
AM283	-21.9026	21.9988
AM284	23.6206	-22.6261
AM285	27.6477	-19.6675
AM286	0.386651	-5.43672
AM287	15.9241	14.3619
AM288	20.6133	31.1143
AM289	25.0357	4.23322
AM290	18.8813	-18.2752
AM291	17.2698	-6.53107
AM292	17.9295	-5.35251
AM293	28.579	-24.1366
AM294	29.2725	-31.517
AM295	17.3491	-19.2754
AM296	20.3855	-27.5049
AM297	12.6609	-11.6529
AM298	17.6137	-3.55631
AM299	29.2809	-31.5216
AM300	22.211	-8.59184
AM301	29.2789	-31.5147
AM302	-21.1255	-11.0301
AM303	20.1054	-15.1897
AM304	27.9012	-35.7408
AM305	-10.7441	-12.2555
AM306	22.7226	-27.926
AM307	18.5907	-17.1539
AM308	-35.0711	-7.23663
AM309	-31.514	-9.68741
AM310	-21.1215	-11.0309
AM311	26.7781	-26.1293
AM312	26.0137	24.0898
AM313	22.116	-6.64351
AM314	11.8601	24.9144
AM315	23.9348	-7.34625
AM316	17.6044	-11.5134
AM317	34.1652	12.4907
AM318	11.8597	22.3341
