# Supplementary material for: Genome-Wide Association Study of Leaf Rust Resistance at Seedling and Adult Plant Stages in a Global Barley Panel
Source: MDPI journal article supplement (doi:10.3390/agriculture12111829), 2022-11-01
Supplement: s1 [file s1 › agriculture-1930506-supplementary/Supplementary Table S6.xlsx]

## Sheet: AM17-K2
Table S6 Q matrix from STRUCTURE analysis.
<trait>	Q1	Q2
AM1	0.995	0.005
AM2	0.212	0.788
AM3	0.466	0.534
AM4	0.755	0.245
AM5	0.914	0.086
AM6	0.926	0.074
AM7	0.102	0.898
AM8	0.965	0.035
AM9	0.588	0.412
AM10	0.975	0.025
AM11	0.998	0.002
AM12	0.235	0.765
AM13	0.914	0.086
AM14	0.715	0.285
AM15	0.998	0.002
AM16	0.715	0.285
AM17	0.658	0.342
AM18	0.808	0.192
AM19	0.999	0.001
AM20	0.818	0.182
AM21	0.275	0.725
AM22	0.52	0.48
AM23	0.973	0.027
AM24	0.916	0.084
AM25	0.469	0.531
AM26	0.997	0.003
AM27	0.848	0.152
AM28	0.992	0.008
AM29	0.926	0.074
AM30	0.8	0.2
AM31	0.994	0.006
AM32	0.926	0.074
AM33	0.867	0.133
AM34	0.977	0.023
AM35	0.998	0.002
AM36	0.946	0.054
AM37	0.276	0.724
AM38	0.507	0.493
AM39	0.993	0.007
AM40	0.775	0.225
AM41	0.216	0.784
AM42	0.245	0.755
AM43	0.064	0.936
AM44	0.706	0.294
AM45	0.648	0.352
AM46	0.029	0.971
AM47	0.947	0.053
AM48	0.667	0.333
AM49	0.83	0.17
AM50	0	1
AM51	0.836	0.164
AM52	0.794	0.206
AM53	0.999	0.001
AM54	0.772	0.228
AM55	0.998	0.002
AM56	0.999	0.001
AM57	0.64	0.36
AM58	0.833	0.167
AM59	0.733	0.267
AM60	0.546	0.454
AM61	0.657	0.343
AM62	0.428	0.572
AM63	0.299	0.701
AM64	0.385	0.615
AM65	0.998	0.002
AM66	0.904	0.096
AM67	0.738	0.262
AM68	0.722	0.278
AM69	0.024	0.976
AM70	0.07	0.93
AM71	0.982	0.018
AM72	0.017	0.983
AM73	0.005	0.995
AM74	0.001	0.999
AM75	0.002	0.998
AM76	0	1
AM77	0	1
AM78	0.001	0.999
AM79	0.001	0.999
AM80	0.001	0.999
AM81	0.001	0.999
AM82	0	1
AM83	0.094	0.906
AM84	0	1
AM85	0.69	0.31
AM86	0.959	0.041
AM87	0.001	0.999
AM88	0.001	0.999
AM89	0.001	0.999
AM90	0.033	0.967
AM91	0.001	0.999
AM92	0.001	0.999
AM93	0.001	0.999
AM94	0.996	0.004
AM95	0.003	0.997
AM96	0.001	0.999
AM97	0.001	0.999
AM98	0.001	0.999
AM99	0.495	0.505
AM100	0.533	0.467
AM101	0.851	0.149
AM102	0.455	0.545
AM103	0.469	0.531
AM104	0.813	0.187
AM105	0.233	0.767
AM106	0.615	0.385
AM107	0.994	0.006
AM108	0.998	0.002
AM109	0.299	0.701
AM110	0.98	0.02
AM111	0.736	0.264
AM112	0.753	0.247
AM113	0.9	0.1
AM114	0.998	0.002
AM115	0.731	0.269
AM116	0.876	0.124
AM117	0.312	0.688
AM118	0.913	0.087
AM119	0.889	0.111
AM120	0.916	0.084
AM121	0.999	0.001
AM122	0.949	0.051
AM123	0.001	0.999
AM124	0.001	0.999
AM125	0.001	0.999
AM126	0.001	0.999
AM127	0.001	0.999
AM128	0.001	0.999
AM129	0.003	0.997
AM130	0.001	0.999
AM131	0	1
AM132	0.002	0.998
AM133	0.039	0.961
AM134	0.001	0.999
AM135	0.007	0.993
AM136	0	1
AM137	0.051	0.949
AM138	0.001	0.999
AM139	0.229	0.771
AM140	0.002	0.998
AM141	0.001	0.999
AM142	0.796	0.204
AM143	0.741	0.259
AM144	0.783	0.217
AM145	0.737	0.263
AM146	0.089	0.911
AM147	0.05	0.95
AM148	0.85	0.15
AM149	0.042	0.958
AM150	0.075	0.925
AM151	0.908	0.092
AM152	0.806	0.194
AM153	0.758	0.242
AM154	0.663	0.337
AM155	0.609	0.391
AM156	0.641	0.359
AM157	0.851	0.149
AM159	0.999	0.001
AM161	0.999	0.001
AM162	0.923	0.077
AM163	0.883	0.117
AM164	0.82	0.18
AM165	0.997	0.003
AM166	0.87	0.13
AM167	0.975	0.025
AM168	0.698	0.302
AM169	0.912	0.088
AM170	0.692	0.308
AM171	0.566	0.434
AM172	0.67	0.33
AM173	0.833	0.167
AM174	0.999	0.001
AM175	0.697	0.303
AM176	0.569	0.431
AM177	0.745	0.255
AM178	0.465	0.535
AM179	0.811	0.189
AM180	0.622	0.378
AM181	0.666	0.334
AM182	0.957	0.043
AM183	0.749	0.251
AM184	0.674	0.326
AM185	0.464	0.536
AM186	0.612	0.388
AM187	0.652	0.348
AM188	0.998	0.002
AM189	0.917	0.083
AM190	0.894	0.106
AM191	0.948	0.052
AM192	0.925	0.075
AM193	0.889	0.111
AM194	0.988	0.012
AM195	0.998	0.002
AM196	0.889	0.111
AM197	0.889	0.111
AM198	0.848	0.152
AM199	0.924	0.076
AM200	0.873	0.127
AM201	0.891	0.109
AM202	0.556	0.444
AM203	0.866	0.134
AM204	0.002	0.998
AM205	0.145	0.855
AM206	0.86	0.14
AM207	0.768	0.232
AM208	0.94	0.06
AM209	0.999	0.001
AM210	0.999	0.001
AM211	0.67	0.33
AM212	0.998	0.002
AM213	0.92	0.08
AM214	0.999	0.001
AM215	0.951	0.049
AM216	0.651	0.349
AM217	0.231	0.769
AM218	0.783	0.217
AM219	0.252	0.748
AM220	0.126	0.874
AM221	0.208	0.792
AM222	0.716	0.284
AM223	0.49	0.51
AM224	0.999	0.001
AM225	0.927	0.073
AM226	0.948	0.052
AM227	0.817	0.183
AM228	0.923	0.077
AM229	0.818	0.182
AM230	0.003	0.997
AM231	0.528	0.472
AM232	0.326	0.674
AM233	0.374	0.626
AM234	0.861	0.139
AM235	0.313	0.687
AM236	0.998	0.002
AM237	0.929	0.071
AM238	0.999	0.001
AM239	0.988	0.012
AM240	0.343	0.657
AM241	0.067	0.933
AM242	0.034	0.966
AM243	0.313	0.687
AM244	0.231	0.769
AM245	0.104	0.896
AM246	0.254	0.746
AM247	0.242	0.758
AM248	0.912	0.088
AM249	0.011	0.989
AM250	0.212	0.788
AM251	0.278	0.722
AM252	0.246	0.754
AM253	0.04	0.96
AM254	0.935	0.065
AM255	0.867	0.133
AM256	0.225	0.775
AM257	0.423	0.577
AM258	0.457	0.543
AM259	0.326	0.674
AM260	0.757	0.243
AM261	0.406	0.594
AM262	0.322	0.678
AM263	0.459	0.541
AM264	0.461	0.539
AM265	0.466	0.534
AM266	0.263	0.737
AM267	0.372	0.628
AM268	0.442	0.558
AM269	0.354	0.646
AM270	0.356	0.644
AM271	0.361	0.639
AM272	0.278	0.722
AM273	0.409	0.591
AM274	0.381	0.619
AM275	0.452	0.548
AM276	0.269	0.731
AM277	0.432	0.568
AM278	0.347	0.653
AM279	0.298	0.702
AM280	0.587	0.413
AM281	0.295	0.705
AM282	0.434	0.566
AM283	0.256	0.744
AM284	0.882	0.118
AM285	0.971	0.029
AM286	0.613	0.387
AM287	0.887	0.113
AM288	0.993	0.007
AM289	0.983	0.017
AM290	0.828	0.172
AM291	0.889	0.111
AM292	0.886	0.114
AM293	0.954	0.046
AM294	0.998	0.002
AM295	0.815	0.185
AM296	0.853	0.147
AM297	0.69	0.31
AM298	0.852	0.148
AM299	0.998	0.002
AM300	0.848	0.152
AM301	0.998	0.002
AM302	0.299	0.701
AM303	0.829	0.171
AM304	0.935	0.065
AM305	0.436	0.564
AM306	0.859	0.141
AM307	0.897	0.103
AM308	0.094	0.906
AM309	0.145	0.855
AM310	0.299	0.701
AM311	0.926	0.074
AM312	0.994	0.006
AM313	0.891	0.109
AM314	0.796	0.204
AM315	0.881	0.119
AM316	0.764	0.236
AM317	0.998	0.002
AM318	0.812	0.188
