# Supplementary material for: Genome-Wide Association Study of Leaf Rust Resistance at Seedling and Adult Plant Stages in a Global Barley Panel
Source: MDPI journal article supplement (doi:10.3390/agriculture12111829), 2022-11-01
Supplement: s1 [file s1 › agriculture-1930506-supplementary/Supplimentary Table S2.xlsx]

## Sheet: Sheet1
Table S2 Average monthly temperature, precipitation, and humidity in Sidi Allal Tazi (Morocco) during 2016-2017 and 2018-2019 cropping seasons.
Month	2016-2017			2018-2019
	Average Temperature (°C)	Total Precipitation (mm)	Average Humidity (%)	Average Temperature (°C)	Total Precipitation (mm)	Average Humidity (%)
November	18.68	145.48	68.1	18.61	73.58	71.7
December	15.54	100.51	79.0645	17.91	5.21	67.8065
January	13.48	38.82	73.129	14.58	77.22	73.0323
February	15.72	76.03	83.0357	16.67	46.04	71.4643
March	18.25	73.72	74.5161	18.7	38.28	71.1613
April	24.03	60.18	60.8667	19.43	79.77	71.7
May	26.72	13.62	61.4516	26.93	7.67	56.2903
June	32.68	3.96	50.5	26.62	0.54	59.3333
July	33.11	1.61	47.0968	28.3	1.7	65.3226
