# Supplementary material for: Genome-Wide Association Study of Leaf Rust Resistance at Seedling and Adult Plant Stages in a Global Barley Panel
Source: MDPI journal article supplement (doi:10.3390/agriculture12111829), 2022-11-01
Supplement: s1 [file s1 › agriculture-1930506-supplementary/Supplimentary Table S4.xlsx]

## Sheet: Feuil1
Table S4 Response of barley genotypes to P. hordei for each reaction class evaluated at the seedling and at the adult plant stages.
Response to LR	Seedling resistance		Adult plant resistance
	SRT-SAT	SRT-MRC	APR-SAT17	APR-SAT19
Number of R genotypes	66	45	46	6
% of R genotypes	20.6%	14.1%	15.0%	2.0%
Number of MR genotypes	153	155	17	40
% of MR genotypes	47.8%	48.4%	5.5%	13.6%
Number of MS genotypes	84	105	25	63
% of MS genotypes	26.2%	32.8%	8.1%	21.4%
Number of S genotypes	17	15	219	186
% of S genotypes	5.3%	4.7%	71.3%	63.1%
Missing genotypes	-	-	13	25
Total genotypes evaluated	320	320	307	295
LSD	0.55	0.53	11.596	7.412
CV	40.1	34.7	60.3	41.6
R: resistant; MR: moderately resistant; MS: moderately susceptible; S: susceptible; HS: highly susceptible
LSD: Least Significant Difference; CV (%): coefficient of variation.
